# Supplementary material for: Switching photorelease to singlet oxygen generation by oxygen functionalization of phenothiazine photocages
Source: Royal Society of Chemistry journal article supplement (doi:10.1039/d1cc06950k), 2022-01-01
Supplement: d1cc06950k1.pdf [file d1cc06950k1.pdf]

## Supporting information

# Modulating Photorelease to Singlet Oxygen Generation by Oxygen Functionalization of Phenothiazine Photocages

Mamata Ojha,<sup>a</sup> Moumita Banerjee,<sup>b</sup> Souvik Ray,<sup>a</sup> Amit Kumar Singh,<sup>a</sup> Anakuthil Anoop,<sup>\*b</sup> and N. D. Pradeep Singh<sup>\*a</sup>

<sup>\*</sup>Department of Chemistry, Indian Institute of Technology Kharagpur, 721302, West Bengal, India.

| Table of content                                                     | Page No.    |
|----------------------------------------------------------------------|-------------|
| <b>1.</b> General procedure and materials                            | <b>4</b>    |
| <b>2.</b> Synthesis of phenothiazine caged ester                     | <b>4</b>    |
| <b>3.</b> Experimental Procedure and spectroscopic data              | <b>5</b>    |
| Synthesis and spectroscopic data of <b>3</b>                         | <b>5</b>    |
| Synthesis and spectroscopic data of <b>4a</b>                        | <b>5-6</b>  |
| Synthesis and spectroscopic data of <b>4b</b>                        | <b>6</b>    |
| Synthesis and spectroscopic data of <b>4c</b>                        | <b>6</b>    |
| Synthesis and spectroscopic data of <b>4d</b>                        | <b>6</b>    |
| Synthesis and spectroscopic data of <b>4e</b>                        | <b>7</b>    |
| Synthesis and spectroscopic data of <b>5a</b>                        | <b>7</b>    |
| Synthesis and spectroscopic data of <b>7</b>                         | <b>7-8</b>  |
| Synthesis and spectroscopic data of <b>8a</b>                        | <b>8</b>    |
| Synthesis and spectroscopic data of <b>8b</b>                        | <b>8</b>    |
| Synthesis and spectroscopic data of <b>8c</b>                        | <b>9</b>    |
| Synthesis and spectroscopic data of <b>9a</b>                        | <b>9</b>    |
| Synthesis and spectroscopic data of <b>10a</b>                       | <b>9-10</b> |
| Synthesis and spectroscopic data of <b>11</b>                        | <b>10</b>   |
| Synthesis and spectroscopic data of <b>12a</b>                       | <b>10</b>   |
| Synthesis and spectroscopic data of <b>12b</b>                       | <b>11</b>   |
| <b>4.</b> <sup>1</sup> H and <sup>13</sup> C NMR spectra of <b>3</b> | <b>12</b>   |

|                                                              |           |
|--------------------------------------------------------------|-----------|
| <sup>1</sup> H and <sup>13</sup> C NMR spectra of <b>4a</b>  | <b>13</b> |
| <sup>1</sup> H and <sup>13</sup> C NMR spectra of <b>4b</b>  | <b>14</b> |
| <sup>1</sup> H and <sup>13</sup> C NMR spectra of <b>4c</b>  | <b>15</b> |
| <sup>1</sup> H and <sup>13</sup> C NMR spectra of <b>4d</b>  | <b>16</b> |
| <sup>1</sup> H and <sup>13</sup> C NMR spectra of <b>4e</b>  | <b>17</b> |
| <sup>1</sup> H and <sup>13</sup> C NMR spectra of <b>5a</b>  | <b>18</b> |
| <sup>1</sup> H and <sup>13</sup> C NMR spectra of <b>7</b>   | <b>19</b> |
| <sup>1</sup> H and <sup>13</sup> C NMR spectra of <b>8a</b>  | <b>20</b> |
| <sup>1</sup> H and <sup>13</sup> C NMR spectra of <b>8b</b>  | <b>21</b> |
| <sup>1</sup> H and <sup>13</sup> C NMR spectra of <b>8c</b>  | <b>22</b> |
| <sup>1</sup> H and <sup>13</sup> C NMR spectra of <b>9a</b>  | <b>23</b> |
| <sup>1</sup> H and <sup>13</sup> C NMR spectra of <b>10a</b> | <b>24</b> |
| <sup>1</sup> H and <sup>13</sup> C NMR spectra of <b>11</b>  | <b>25</b> |
| <sup>1</sup> H and <sup>13</sup> C NMR spectra of <b>12a</b> | <b>26</b> |
| <sup>1</sup> H and <sup>13</sup> C NMR spectra of <b>12b</b> | <b>27</b> |
| <b>5. HRMS spectra of 4a</b>                                 | <b>28</b> |
| HRMS spectra of <b>4b</b>                                    | <b>28</b> |
| HRMS spectra of <b>4c</b>                                    | <b>28</b> |
| HRMS spectra of <b>4d</b>                                    | <b>28</b> |
| HRMS spectra of <b>4e</b>                                    | <b>29</b> |
| HRMS spectra of <b>5a</b>                                    | <b>29</b> |
| HRMS spectra of <b>8a</b>                                    | <b>29</b> |
| HRMS spectra of <b>8b</b>                                    | <b>29</b> |
| HRMS spectra of <b>8c</b>                                    | <b>30</b> |
| HRMS spectra of <b>9a</b>                                    | <b>30</b> |
| HRMS spectra of <b>10a</b>                                   | <b>30</b> |
| HRMS spectra of <b>11</b>                                    | <b>30</b> |
| HRMS spectra of <b>12a</b>                                   | <b>31</b> |
| HRMS spectra of <b>12b</b>                                   | <b>31</b> |

|                                                                                                                                                                                                                                          |              |
|------------------------------------------------------------------------------------------------------------------------------------------------------------------------------------------------------------------------------------------|--------------|
| <b>6. Photophysical properties of phenothiazine caged esters 4a-e, 5a, 8a-c, 9a, 10a and 12a-b</b>                                                                                                                                       | <b>31-32</b> |
| <b>7. Measurement of fluorescence quantum yields</b>                                                                                                                                                                                     | <b>32-33</b> |
| <b>8. Characterisation of photoproduct for photolysis of single-arm caged ester 4a</b>                                                                                                                                                   | <b>33</b>    |
| <b>9. Characterisation of photoproduct for photolysis of dual-arm (same) caged ester 8a</b> a) <sup>1</sup> H NMR study of dual-arm caged ester <b>8a</b> during photolysis.<br>b) HRMS spectra of dual-arm (same) caged ester <b>8a</b> | <b>33-35</b> |
| <b>10. Characterisation of photoproduct for photolysis of dual-arm (different) caged ester 12a by HRMS spectra</b>                                                                                                                       | <b>35-36</b> |
| <b>11. Hydrolytic stability of the caged ester (4a-e, 8a-c, and 12a-b) in dark</b>                                                                                                                                                       | <b>36</b>    |
| <b>12. Quenching study of photolysis</b>                                                                                                                                                                                                 | <b>37</b>    |
| <b>13. Measurement of singlet oxygen quantum yields of 5a, 10a in acetonitrile</b>                                                                                                                                                       | <b>37</b>    |
| <b>14. Determination of incident photon flux (I<sub>0</sub>) of the UV lamp by potassium ferrioxalate actinometry</b>                                                                                                                    | <b>38-39</b> |
| <b>15. Measurement of photochemical quantum yields and photochemical rate constant determination for the photodegradation of single-arm caged ester 4a and dual-arm caged ester 8a</b>                                                   | <b>39</b>    |
| <b>16. Computational data</b>                                                                                                                                                                                                            | <b>40-42</b> |
| <b>17. Electron density map at the critical point around the C-O cleaved site</b>                                                                                                                                                        | <b>42-43</b> |
| <b>18. Coordinates used in DFT and TDDFT Calculations</b>                                                                                                                                                                                | <b>43-48</b> |
| <b>19. References</b>                                                                                                                                                                                                                    | <b>49</b>    |



POCl<sub>3</sub> (1.1 equiv), DMF, 60°C, 12 h; (ii) NaBH<sub>4</sub>, MeOH, rt, 3 h; (iii) EDC (1 eq.), R<sub>1</sub>COOH (1 eq.), DMAP, dry DCM, 3 h; (iv) mCPBA, CH<sub>2</sub>Cl<sub>2</sub>; (v) POCl<sub>3</sub> (10 equiv), DMF, Chlorobenzene, 110°C, 6 h; (vi) NaBH<sub>4</sub>, MeOH, rt, 3 h; (vii) EDC (3 eq.), R<sub>2</sub>COOH (3 eq.), DMAP, dry DCM, 3 h; (viii) mCPBA, CH<sub>2</sub>Cl<sub>2</sub>; (ix) H<sub>2</sub>O<sub>2</sub>, Acetic Acid; (x) EDC (1 eq.), R<sub>3</sub>COOH (1 eq.), DMAP, dry DCM, 30 min; (xi) EDC (1 eq.), R<sub>4</sub>COOH (1 eq.), DMAP, dry DCM, 3 h.

### 3. Experimental Procedure and spectroscopic data:

**Synthesis of 10-ethyl-10H-phenothiazine (1):** The compound **1** was synthesized according to the literature procedure.<sup>1</sup>

**Synthesis of 10-ethyl-10H-phenothiazine-3-carbaldehyde (2):** The compound was synthesized according to the literature procedure.<sup>2</sup>

#### Synthesis of (10-ethyl-10H-phenothiazin-3-yl)methanol<sup>3</sup> (3):

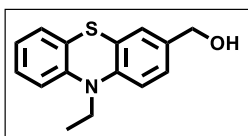

To a stirred solution of the formyl derivative (256 mg, 1 mmol, 1 equiv) in dry methanol (10 ml), NaBH<sub>4</sub> (76 mg, 2 mmol, 2 equiv) was added portionwise at 0°C and the resulting mixture was stirred further at room temperature for 1 hr.

The mixture was concentrated in vacuo & the residue was diluted with ethyl acetate. The organic layers was washed with water & then brine, dried over anhydrous Na<sub>2</sub>SO<sub>4</sub> and give the colourless solid. (Yield 235 mg, 91%). <sup>1</sup>H NMR (500 MHz, CDCl<sub>3</sub>) δ 7.16 – 7.10 (m, 4H), 6.92 – 6.88 (m, 1H), 6.86 (d, *J* = 8.2 Hz, 1H), 6.83 (d, *J* = 8.8 Hz, 1H), 4.55 (s, 2H), 3.91 (q, *J* = 7.0 Hz, 2H), 1.41 (t, *J* = 7.0 Hz, 3H). <sup>13</sup>C NMR (126 MHz, CDCl<sub>3</sub>) δ 145.0, 144.6, 135.1, 127.5, 127.4, 126.4, 126.3, 124.8, 124.3, 122.5, 115.2, 115.2, 64.8, 42.0, 13.1.

#### General procedure for the synthesis of single-arm caged esters (4a-e):

1.2 equiv of the corresponding acid and EDC-HCl (1.2 equiv) was dissolved in dry DCM and cooled to 0°C. After 5 min compound, **3** (50 mg, 0.19 mmol) and DMAP (cat.) were added to the reaction mixture. The reaction was allowed to stir at room temperature for 3 h. After completion of the reaction, it was extracted with DCM, washed with saturated NaHCO<sub>3</sub> solution, and dried over Na<sub>2</sub>SO<sub>4</sub>. The solvent was removed in rotary evaporation under reduced pressure, and the crude residue was purified by column chromatography using EtOAc in hexane.

#### Synthesis of (10-ethyl-10H-phenothiazin-3-yl)methyl 4-methoxybenzoate (4a):

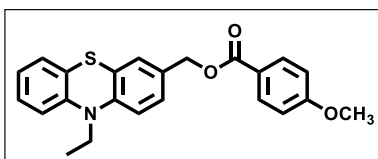

4-Methoxybenzoic acid was treated with compound **3** as aforementioned procedure, and the crude residue was purified by chromatography on silica gel using 20% EtOAc in pet ether to give the pale greenish coloured gel product. (Yield 69 mg, 92%).

$^1\text{H}$  NMR (500 MHz,  $\text{CDCl}_3$ )  $\delta$  8.03 – 8.00 (m, 2H), 7.22 (dd,  $J = 4.3, 2.3$  Hz, 2H), 7.16 – 7.11 (m, 2H), 6.93 – 6.90 (m, 2H), 6.90 (s, 1H), 6.85 (t,  $J = 7.8$  Hz, 2H), 5.22 (s, 2H), 3.92 (q,  $J = 6.9$  Hz, 2H), 3.84 (s, 3H), 1.41 (t,  $J = 7.0$  Hz, 3H).  $^{13}\text{C}$  NMR (126 MHz,  $\text{CDCl}_3$ )  $\delta$  166.3, 163.6, 145.2, 144.9, 131.9, 130.5, 127.8, 127.4, 124.3, 122.8, 122.6, 115.2, 115.1, 113.8, 7.96, 55.6, 42.0, 13.1. HRMS (ESI $^+$ ) calcd for  $\text{C}_{23}\text{H}_{22}\text{NO}_3\text{S}$   $[\text{M}+\text{H}]^+$ , 392.1320; found: 392.1330.

#### Synthesis of (10-ethyl-10H-phenothiazin-3-yl)methyl 4-methylbenzoate (4b):

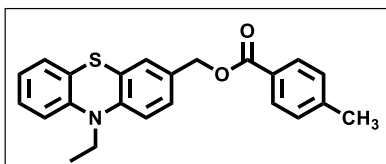

Toluic acid was treated with compound **3** using the aforementioned procedure, and the crude residue was purified by chromatography on silica gel using 20% EtOAc in pet ether to give the pale yellow coloured gel product. (Yield 65 mg, 90%).

$^1\text{H}$  NMR (500 MHz,  $\text{CDCl}_3$ )  $\delta$  7.92 (d,  $J = 7.9$  Hz, 1H), 7.39 (t,  $J = 7.5$  Hz, 1H), 7.25 – 7.20 (m, 4H), 7.14 (dd,  $J = 16.1, 7.7$  Hz, 2H), 6.91 (s, 1H), 6.86 (t,  $J = 7.1$  Hz, 2H), 5.22 (s, 2H), 3.93 (q, 2H), 2.60 (s, 3H), 1.42 (t,  $J = 6.9$  Hz, 3H).  $^{13}\text{C}$  NMR (101 MHz,  $\text{CDCl}_3$ )  $\delta$  167.5, 145.1, 140.4, 132.2, 131.8, 130.9, 129.6, 127.8, 127.5, 125.8, 124.8, 124.1, 122.7, 115.3, 115.1, 65.6, 42.0, 22.1, 13.2. HRMS (ESI $^+$ ) calcd for  $\text{C}_{23}\text{H}_{22}\text{NO}_2\text{S}$   $[\text{M}+\text{H}]^+$ , 376.1371; found: 376.1382.

#### Synthesis of (10-ethyl-10H-phenothiazin-3-yl)methyl 2-chlorobenzoate (4c):

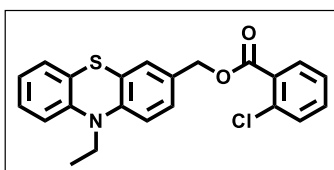

*o*-chloro benzoic acid was treated with compound **3** as aforementioned procedure and the crude residue was purified by chromatography on silica gel using 20% EtOAc in pet ether to give the pale yellow coloured gel product. (Yield 67 mg, 88%).  $^1\text{H}$  NMR (400 MHz,  $\text{CDCl}_3$ )  $\delta$  7.82

(dd,  $J = 7.7, 1.5$  Hz, 1H), 7.42 (m, 2H), 7.31 – 7.28 (m, 1H), 7.25 – 7.21 (m, 2H), 7.18 – 7.09 (m, 2H), 6.91 (m, 1H), 6.86 (dd,  $J = 8.0, 5.1$  Hz, 2H), 5.24 (s, 2H), 3.92 (q,  $J = 6.9$  Hz, 2H), 1.41 (t,  $J = 6.9$  Hz, 3H).  $^{13}\text{C}$  NMR (126 MHz,  $\text{CDCl}_3$ )  $\delta$  165.5, 145.3, 144.8, 133.9, 132.6, 131.6, 131.2, 130.1, 129.7, 128.0, 127.8, 127.5, 127.4, 126.6, 124.8, 124.2, 122.6, 115.2, 115.0, 66.8, 42.0, 13.1. HRMS (ESI $^+$ ) calcd for  $\text{C}_{22}\text{H}_{19}\text{ClNO}_2\text{S}$   $[\text{M}+\text{H}]^+$ , 396.0825; found: 396.0832.

#### Synthesis of (10-ethyl-10H-phenothiazin-3-yl)methyl acetate (4d):

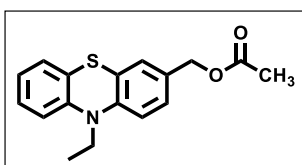

Acetic acid was treated with compound **3** as aforementioned procedure and the crude residue was purified by chromatography on silica gel using 20% EtOAc in pet ether to give the pale yellow coloured gel product. (Yield 48 mg, 85%).  $^1\text{H}$  NMR (400 MHz,  $\text{CDCl}_3$ )  $\delta$  7.16 – 7.08 (m, 4H), 6.90 (s, 1H),

6.84 (dd,  $J = 12.3, 8.5$  Hz, 2H), 4.98 (s, 2H), 3.91 (q, 2H), 2.08 (s, 3H), 1.41 (t,  $J = 6.9$  Hz, 3H).  $^{13}\text{C}$  NMR (126 MHz,  $\text{CDCl}_3$ )  $\delta$  171.0, 145.2, 144.8, 130.1, 127.8, 127.7, 127.5, 127.4, 124.8, 124.2, 122.6, 115.2, 115.0, 65.8, 42.0, 21.1, 13.1. HRMS calcd for  $\text{C}_{17}\text{H}_{18}\text{NO}_2\text{S}$   $[\text{M}+\text{H}]^+$ , 300.1058, found: 300.1063.

### Synthesis of (10-ethyl-10H-phenothiazin-3-yl)methyl (tert-butoxycarbonyl)glycinate (4e):

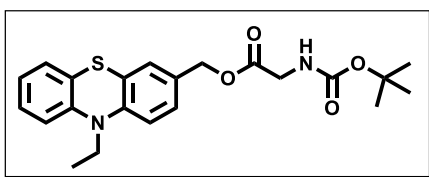

(tert-butoxycarbonyl)glycinate was treated with compound **3** as aforementioned procedure and the crude residue was purified by chromatography on silica gel using 20% EtOAc in pet ether to give the pale yellow coloured gel product. (Yield 64 mg, 80%).

$^1\text{H}$  NMR (500 MHz,  $\text{CDCl}_3$ )  $\delta$  7.16 – 7.08 (m, 4H), 6.91 (d,  $J = 7.3$  Hz, 1H), 6.84 (dd,  $J = 17.8, 8.2$  Hz, 2H), 5.05 (s, 2H), 4.98 (s, 1H), 3.92 (m, 4H), 1.44 (s, 9H), 1.41 (t,  $J = 6.9$  Hz, 3H).  $^{13}\text{C}$  NMR (126 MHz,  $\text{CDCl}_3$ )  $\delta$  170.4, 155.8, 145.4, 144.8, 129.4, 128.0, 127.9, 127.5, 127.4, 124.9, 124.2, 122.7, 115.3, 115.1, 66.6, 42.7, 42.0, 28.4, 13.1. HRMS (ESI $^+$ ) calcd for  $\text{C}_{22}\text{H}_{26}\text{N}_2\text{NaO}_4\text{S}$  [ $\text{M}+\text{Na}$ ] $^+$ , 437.1511; found: 437.1488.

### (10-ethyl-5-oxido-10H-phenothiazin-3-yl)methyl 4-methoxybenzoate (5a):

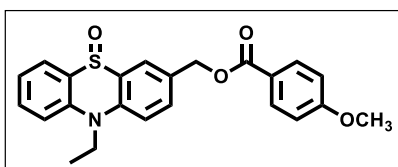

Treatment of **4a** (50 mg, 0.127 mmol) with mCPBA (22 mg, 0.127 mmol) in dry DCM (4 ml) at 0 °C to room temperature for a period of 4 h afforded the conjugate. The crude conjugate was washed with water &  $\text{NaHCO}_3$ , dried over anhydrous  $\text{Na}_2\text{SO}_4$ .

Then the solvent was removed in rotary evaporation under reduced pressure and the crude residue was purified by column chromatography using 40% EtOAc in hexane to give the white solid. (Yield 47 mg, 91%).  $^1\text{H}$  NMR (400 MHz,  $\text{CDCl}_3$ )  $\delta$  8.06 – 7.98 (m, 3H), 7.95 (dd,  $J = 7.6, 1.4$  Hz, 1H), 7.72 (dd,  $J = 8.7, 1.9$  Hz, 1H), 7.67 – 7.60 (m, 1H), 7.47 (dd,  $J = 8.6, 2.2$  Hz, 2H), 7.29 – 7.23 (m, 1H), 6.91 (d,  $J = 8.8$  Hz, 2H), 5.39 (s, 2H), 4.37 (q,  $J = 7.1$  Hz, 2H), 3.85 (s, 3H), 1.58 (t,  $J = 7.1$  Hz, 3H).  $^{13}\text{C}$  NMR (126 MHz,  $\text{CDCl}_3$ )  $\delta$  166.3, 163.7, 138.1, 138.1, 133.4, 133.2, 132.0, 131.9, 130.0, 122.5, 122.1, 115.9, 115.7, 113.8, 65.5, 55.6, 43.0, 12.2. HRMS (ESI $^+$ ) calcd for  $\text{C}_{23}\text{H}_{22}\text{NO}_4\text{S}$  [ $\text{M}+\text{H}$ ] $^+$ , 408.1270; found: 408.1282.

**Synthesis of 10-ethyl-10H-phenothiazine-3,7-dicarbaldehyde (6):** Same as described procedure.<sup>4</sup>

### Synthesis of (10-ethyl-10H-phenothiazine-3,7-diy)dimethanol<sup>5</sup> (7):

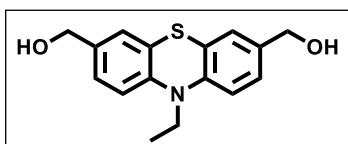

To a stirred solution of the formyl derivative (285 mg, 1 mmol, 1 equiv) in dry methanol (10 ml),  $\text{NaBH}_4$  (95 mg, 2.5 mmol, 2.5 equiv) was added portion-wise at 0°C, and the resulting mixture was stirred further at room temperature for 1 hr. The mixture was concentrated in vacuo & the residue was diluted with ethyl acetate. The organic layer was washed with water & then brine, dried over anhydrous  $\text{Na}_2\text{SO}_4$ . Then the solvent was removed in rotary evaporation under reduced pressure, and the crude residue was purified by column chromatography using 40% EtOAc in hexane to give the pale yellow gel. (Yield 230 mg, 80%).  $^1\text{H}$  NMR (400 MHz,  $\text{CDCl}_3$ )  $\delta$  7.45 (d,  $J = 6.0$ , 1H), 7.20 (d,  $J = 6.0$  Hz, 1H), 7.12 (s,

2H), 6.83 (d,  $J = 8.8$  Hz, 2H), 4.56 (s, 4H), 3.90 (s, 2H), 1.40 (t,  $J = 7.1$  Hz, 3H).  $^{13}\text{C}$  NMR (126 MHz,  $\text{CDCl}_3$ )  $\delta$  144.5, 135.2, 126.4, 124.6, 115.2, 64.8, 42.1, 13.1.

#### General procedure for the synthesis of dual-arm caged esters (8a-c):

2.2 equiv of the corresponding acid and EDC-HCl (2.2 equiv) was dissolved in dry DCM and cooled to  $0^\circ\text{C}$ . After 5 min compound, **7** (50 mg, 0.17 mmol) and DMAP (cat.) were added to the reaction mixture. The reaction was allowed to stir at room temperature for 3 h. After completion of the reaction, it was extracted with DCM, washed with saturated  $\text{NaHCO}_3$  solution, and dried over  $\text{Na}_2\text{SO}_4$ . The solvent was removed in rotary evaporation under reduced pressure, and the crude residue was purified by column chromatography using EtOAc in hexane.

#### Synthesis of (10-ethyl-10H-phenothiazine-3,7-diyl)bis(methylene) bis(4-methoxybenzoate) (8a):

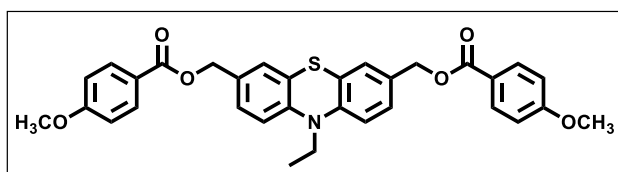

4-Methoxybenzoic acid was treated with compound **7** as aforementioned procedure, and the crude residue was purified by chromatography on silica gel using 30% EtOAc

in pet ether to give the pale greenish coloured gel product. (Yield 67 mg, 69%).  $^1\text{H}$  NMR (500 MHz,  $\text{CDCl}_3$ )  $\delta$  8.00 (d,  $J = 8.6$  Hz, 4H), 7.21 (m, 4H), 6.90 (d,  $J = 8.5$  Hz, 4H), 6.84 (d,  $J = 8.0$  Hz, 2H), 5.20 (s, 4H), 3.92 (m, 2H), 3.85 (s, 6H), 1.41 (t,  $J = 6.9$  Hz, 3H).  $^{13}\text{C}$  NMR (126 MHz,  $\text{CDCl}_3$ )  $\delta$  166.3, 163.6, 144.9, 131.9, 130.7, 127.9, 127.7, 124.5, 122.8, 115.1, 113.8, 65.9, 55.6, 42.1, 13.1. HRMS (ESI $^+$ ) calcd for  $\text{C}_{32}\text{H}_{30}\text{NO}_6\text{S}$   $[\text{M}+\text{H}]^+$ , 556.1794; found: 556.1778.

#### Synthesis of (10-ethyl-10H-phenothiazine-3,7-diyl)bis(methylene) bis(2-chlorobenzoate) (8b):

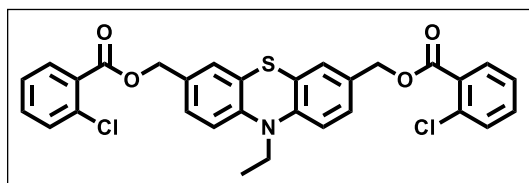

*p*-Chloro benzoic acid was treated with compound **7** as aforementioned procedure, and the crude residue was purified by chromatography on silica gel using 30% EtOAc in pet ether to give the pale greenish coloured

gel product. (Yield 64 mg, 65%).  $^1\text{H}$  NMR (400 MHz,  $\text{CDCl}_3$ )  $\delta$  7.82 (d,  $J = 7.7$  Hz, 2H), 7.42 (m, 7.6 Hz, 4H), 7.29 (t,  $J = 7.5$  Hz, 2H), 7.26 – 7.19 (m, 4H), 6.85 (d,  $J = 8.2$  Hz, 2H), 5.24 (s, 4H), 3.92 (q,  $J = 6.9$  Hz, 2H), 1.41 (t,  $J = 6.9$  Hz, 3H).  $^{13}\text{C}$  NMR (126 MHz,  $\text{CDCl}_3$ )  $\delta$  165.6, 145.0, 134.0, 132.7, 131.7, 131.2, 130.1, 129.9, 128.2, 127.9, 126.7, 124.5, 115.1, 66.8, 42.1, 13.0. HRMS (ESI $^+$ ) calcd for  $\text{C}_{30}\text{H}_{24}\text{Cl}_2\text{NO}_4\text{S}$   $[\text{M}+\text{H}]^+$ , 564.0803; found: 564.0788.



### Synthesis of (10-ethyl-10*H*-phenothiazine-3,7-diyl)bis(methylene) bis(2 propylpentanoate) (**8c**):

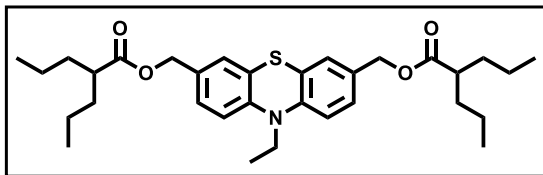

Valproic acid was treated with compound **7** as aforementioned procedure and the crude residue was purified by chromatography on silica gel using 25% EtOAc in pet ether to give the pale yellow coloured

gel product. (Yield 66 mg, 70%). <sup>1</sup>H NMR (500 MHz, CDCl<sub>3</sub>) δ 7.06 – 6.95 (m, 4H), 6.72 (d, *J* = 8.1 Hz, 2H), 4.88 (s, 4H), 3.81 (q, *J* = 6.7 Hz, 2H), 2.30 (dd, *J* = 11.4, 6.4 Hz, 2H), 1.57 – 1.45 (m, 7H), 1.31 (d, *J* = 6.6 Hz, 7H), 1.20 – 1.16 (m, 8H), 0.78 (t, *J* = 7.3 Hz, 9H). <sup>13</sup>C NMR (101 MHz, CDCl<sub>3</sub>) δ 176.6, 144.8, 135.2, 130.5, 127.5, 126.4, 124.4, 115.0, 65.3, 45.4, 42.0, 34.7, 20.7, 14.1, 13.0. HRMS (ESI<sup>+</sup>) calcd for C<sub>32</sub>H<sub>46</sub>NO<sub>4</sub>S [M+H]<sup>+</sup>, 540.3148; found: 540.3133.

### Synthesis of (10-ethyl-5-oxido-10*H*-phenothiazine-3,7-diyl)bis(methylene) bis(4-methoxybenzoate) (**9a**):

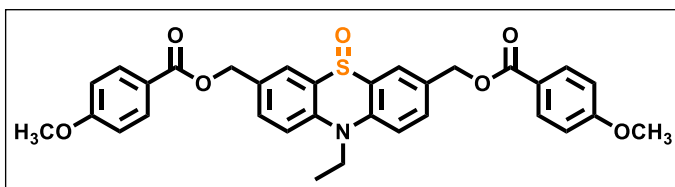

Treatment of **8a** (50 mg, 0.089 mmol) with mCPBA (16 mg, 0.089 mmol) in dry DCM (4 ml) at 0 °C to room temperature for a period of 4 h afforded the conjugate.

The crude conjugate was washed with water & NaHCO<sub>3</sub>, dried over anhydrous Na<sub>2</sub>SO<sub>4</sub>. Then the solvent was removed in rotary evaporation under reduced pressure, and the crude residue was purified by column chromatography using 50% EtOAc in hexane to give the white solid. (Yield 44 mg, 90%). <sup>1</sup>H NMR (500 MHz, CDCl<sub>3</sub>) δ 8.06 – 7.98 (m, 6H), 7.72 (d, *J* = 8.7 Hz, 2H), 7.47 (d, *J* = 8.8 Hz, 2H), 6.91 (d, *J* = 8.2 Hz, 4H), 5.39 (s, 4H), 4.37 (q, *J* = 6.8 Hz, 2H), 3.85 (s, 6H), 1.57 (t, *J* = 7.0 Hz, 3H). <sup>13</sup>C NMR (126 MHz, CDCl<sub>3</sub>) δ 166.2, 163.7, 137.9, 133.4, 131.9, 130.2, 124.1, 122.5, 115.9, 113.8, 65.4, 55.6, 43.0, 12.2. HRMS (ESI<sup>+</sup>) calcd for C<sub>32</sub>H<sub>30</sub>NO<sub>7</sub>S [M+H]<sup>+</sup>, 572.1743; found: 572.1715.

### Synthesis of (10-ethyl-5,5-dioxido-10*H*-phenothiazine-3,7-diyl)bis(methylene) bis(4-methoxybenzoate) (**10a**):

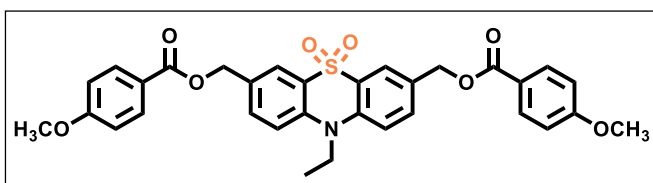

Oxidation of **9a** (50 mg, 0.085 mmol) with H<sub>2</sub>O<sub>2</sub> (0.05 ml) in the presence of acetic acid (0.25 ml) at 50°C for a period of 2 h afforded compound **10a**. The crude

conjugate was extracted with DCM and washed with water, dried over anhydrous Na<sub>2</sub>SO<sub>4</sub>. Then the solvent was removed in rotary evaporation under reduced pressure and the crude residue was purified by column chromatography using 80% EtOAc in hexane to give the white solid. (Yield 23 mg, 47%). <sup>1</sup>H NMR (400 MHz, CDCl<sub>3</sub>) δ 8.22 (s, 2H), 8.01 (d, *J* = 8.7 Hz, 4H), 7.72 (d, *J* = 8.7 Hz, 2H), 7.39 (d, *J* = 8.8 Hz, 2H), 6.91 (d, *J* = 8.7 Hz, 4H), 5.38 (s, 4H), 4.28 (q, *J* = 7.1 Hz, 2H), 3.85 (s, 6H), 1.55 (t, *J*

= 7.0 Hz, 3H).  $^{13}\text{C}$  NMR (101 MHz,  $\text{CDCl}_3$ )  $\delta$  166.1, 163.7, 140.3, 133.6, 131.9, 130.5, 124.1, 123.7, 122.3, 116.1, 113.8, 65.2, 55.5, 43.4, 12.6. HRMS (ESI<sup>+</sup>) calcd for  $\text{C}_{32}\text{H}_{33}\text{N}_2\text{O}_8\text{S}$  [ $\text{M}+\text{NH}_4$ ]<sup>+</sup>, 605.1958; found: 605.1947.

### Synthesis of (10-ethyl-7-(hydroxymethyl)-10H-phenothiazin-3-yl)methyl 4-methoxybenzoate

(11):

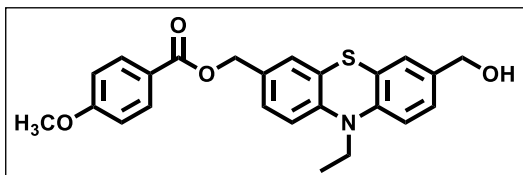

Anisic acid (0.9 equiv.) and EDC-HCl (1.0 equiv.) was dissolved in dry DCM and cooled to 0 °C. After 5 min compound **7** (200 mg, 0.97 mmol) and DMAP (cat.) was added to the reaction mixture. The reaction was allowed

to stir at room temperature for 3 h. After completion of the reaction it was extracted with DCM and washed with saturated  $\text{NaHCO}_3$  solution and dried over  $\text{Na}_2\text{SO}_4$ . The solvent was removed in rotary evaporation under reduced pressure and the crude residue was purified by column chromatography using 30% EtOAc in hexane. (Yield 148 mg, 50%).  $^1\text{H}$  NMR (500 MHz,  $\text{CDCl}_3$ )  $\delta$  8.00 (d,  $J$  = 8.5 Hz, 2H), 7.21 (d,  $J$  = 8.6 Hz, 2H), 7.12 (s, 2H), 6.90 (d,  $J$  = 8.5 Hz, 2H), 6.84 (d,  $J$  = 5.5 Hz, 2H), 5.20 (s, 2H), 4.57 (s, 2H), 3.91 (m, 2H), 3.85 (s, 3H), 1.41 (t,  $J$  = 6.9 Hz, 3H).  $^{13}\text{C}$  NMR (126 MHz,  $\text{CDCl}_3$ )  $\delta$  166.3, 163.6, 135.4, 131.9, 130.6, 127.9, 127.7, 126.4, 124.6, 122.8, 115.2, 115.0, 113.8, 65.93 (s), 55.6, 42.1, 13.1. HRMS (ESI<sup>+</sup>) calcd for  $\text{C}_{24}\text{H}_{24}\text{NO}_4\text{S}$  [ $\text{M}+\text{H}$ ]<sup>+</sup>, 422.1426; found: 422.1409.

### Synthesis of (10-ethyl-7-(((4-methoxybenzoyl)oxy)methyl)-10H-phenothiazin-3-yl)methyl 4-methylbenzoate (12a):

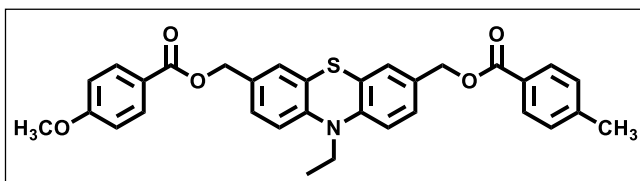

Toluic acid (0.9 equiv, ) and EDC-HCl (1.0 equiv, ) was dissolved in dry DCM and cooled to 0 °C. After 5 min compound **11** (50 mg, 0.12 mmol) and DMAP (cat.) was added

to the reaction mixture. The reaction was allowed to stir at room temperature for 3 h. After completion of the reaction it was extracted with DCM and washed with saturated  $\text{NaHCO}_3$  solution and dried over  $\text{Na}_2\text{SO}_4$ . The solvent was removed in rotary evaporation under reduced pressure and the crude residue was purified by column chromatography using 20% EtOAc in hexane. (Yield 49 mg, 77%).  $^1\text{H}$  NMR (500 MHz,  $\text{CDCl}_3$ )  $\delta$  8.00 (d,  $J$  = 8.0 Hz, 2H), 7.91 (d,  $J$  = 7.6 Hz, 1H), 7.38 (t,  $J$  = 7.4 Hz, 1H), 7.25 – 7.17 (m, 6H), 6.90 (d,  $J$  = 7.9 Hz, 2H), 6.84 (d,  $J$  = 8.1 Hz, 2H), 5.21 (s, 4H), 3.92 (q, 2H), 3.85 (s, 3H), 2.59 (s, 3H), 1.41 (t,  $J$  = 6.8 Hz, 3H).  $^{13}\text{C}$  NMR (126 MHz,  $\text{CDCl}_3$ )  $\delta$  167.6, 166.2, 163.7, 140.6, 132.4, 131.9, 131.7, 130.6, 129.6, 127.8, 127.6, 126.0, 122.3, 115.1, 113.8, 65.9, 55.6, 43.4, 41.8, 22.0. HRMS (ESI<sup>+</sup>) calcd for  $\text{C}_{32}\text{H}_{30}\text{NO}_5\text{S}$  [ $\text{M}+\text{H}$ ]<sup>+</sup>, 540.1845; found: 540.1829.

**Synthesis of (10-ethyl-7-((2-phenylacetoxy)methyl)-10H-phenothiazin-3-yl)methyl 4-methoxybenzoate (12b):**

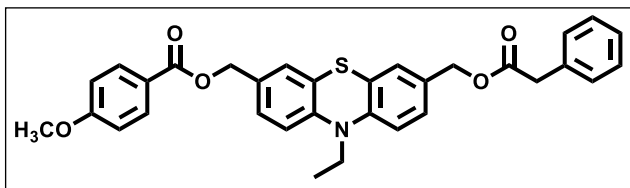

Phenyl acetic acid (0.9 equiv, ) and EDC-HCl (1.0 equiv, ) was dissolved in dry DCM and cooled to 0 °C. After 5 min compound **11** (50 mg, 0.12 mmol) and DMAP (cat.) was added

to the reaction mixture. The reaction was allowed to stir at room temperature for 3 h. After completion of the reaction it was extracted with DCM and washed with saturated NaHCO<sub>3</sub> solution and dried over Na<sub>2</sub>SO<sub>4</sub>. The solvent was removed in rotary evaporation under reduced pressure and the crude residue was purified by column chromatography using 20% EtOAc in hexane. (Yield 45 mg, 70%). <sup>1</sup>H NMR (500 MHz, CDCl<sub>3</sub>) δ 8.00 (d, *J* = 8.6 Hz, 2H), 7.35 – 7.29 (m, 2H), 7.27 (d, *J* = 7.5 Hz, 4H), 7.21 (d, *J* = 9.4 Hz, 2H), 7.08 (d, *J* = 11.8 Hz, 2H), 6.90 (d, *J* = 8.6 Hz, 2H), 6.84 (d, *J* = 8.1 Hz, 1H), 6.80 (d, *J* = 8.2 Hz, 1H), 5.20 (s, 2H), 5.00 (s, 2H), 3.91 (q, *J* = 6.9 Hz, 2H), 3.85 (s, 3H), 3.63 (s, 2H), 1.40 (t, *J* = 6.9 Hz, 3H). <sup>13</sup>C NMR (126 MHz, CDCl<sub>3</sub>) δ 171.4, 166.2, 163.5, 144.7, 133.9, 131.7, 130.5, 130.1, 129.3, 128.6, 127.6, 127.1, 124.3, 122.6, 114.9, 113.6, 65.9, 65.7, 55.4, 41.9, 41.4, 12.8. HRMS (ESI<sup>+</sup>) calcd for C<sub>32</sub>H<sub>30</sub>NO<sub>5</sub>S [M+H]<sup>+</sup>, 540.1845; found: 540.1833.

#### 4. $^1\text{H}$ and $^{13}\text{C}$ NMR of the caged compounds:

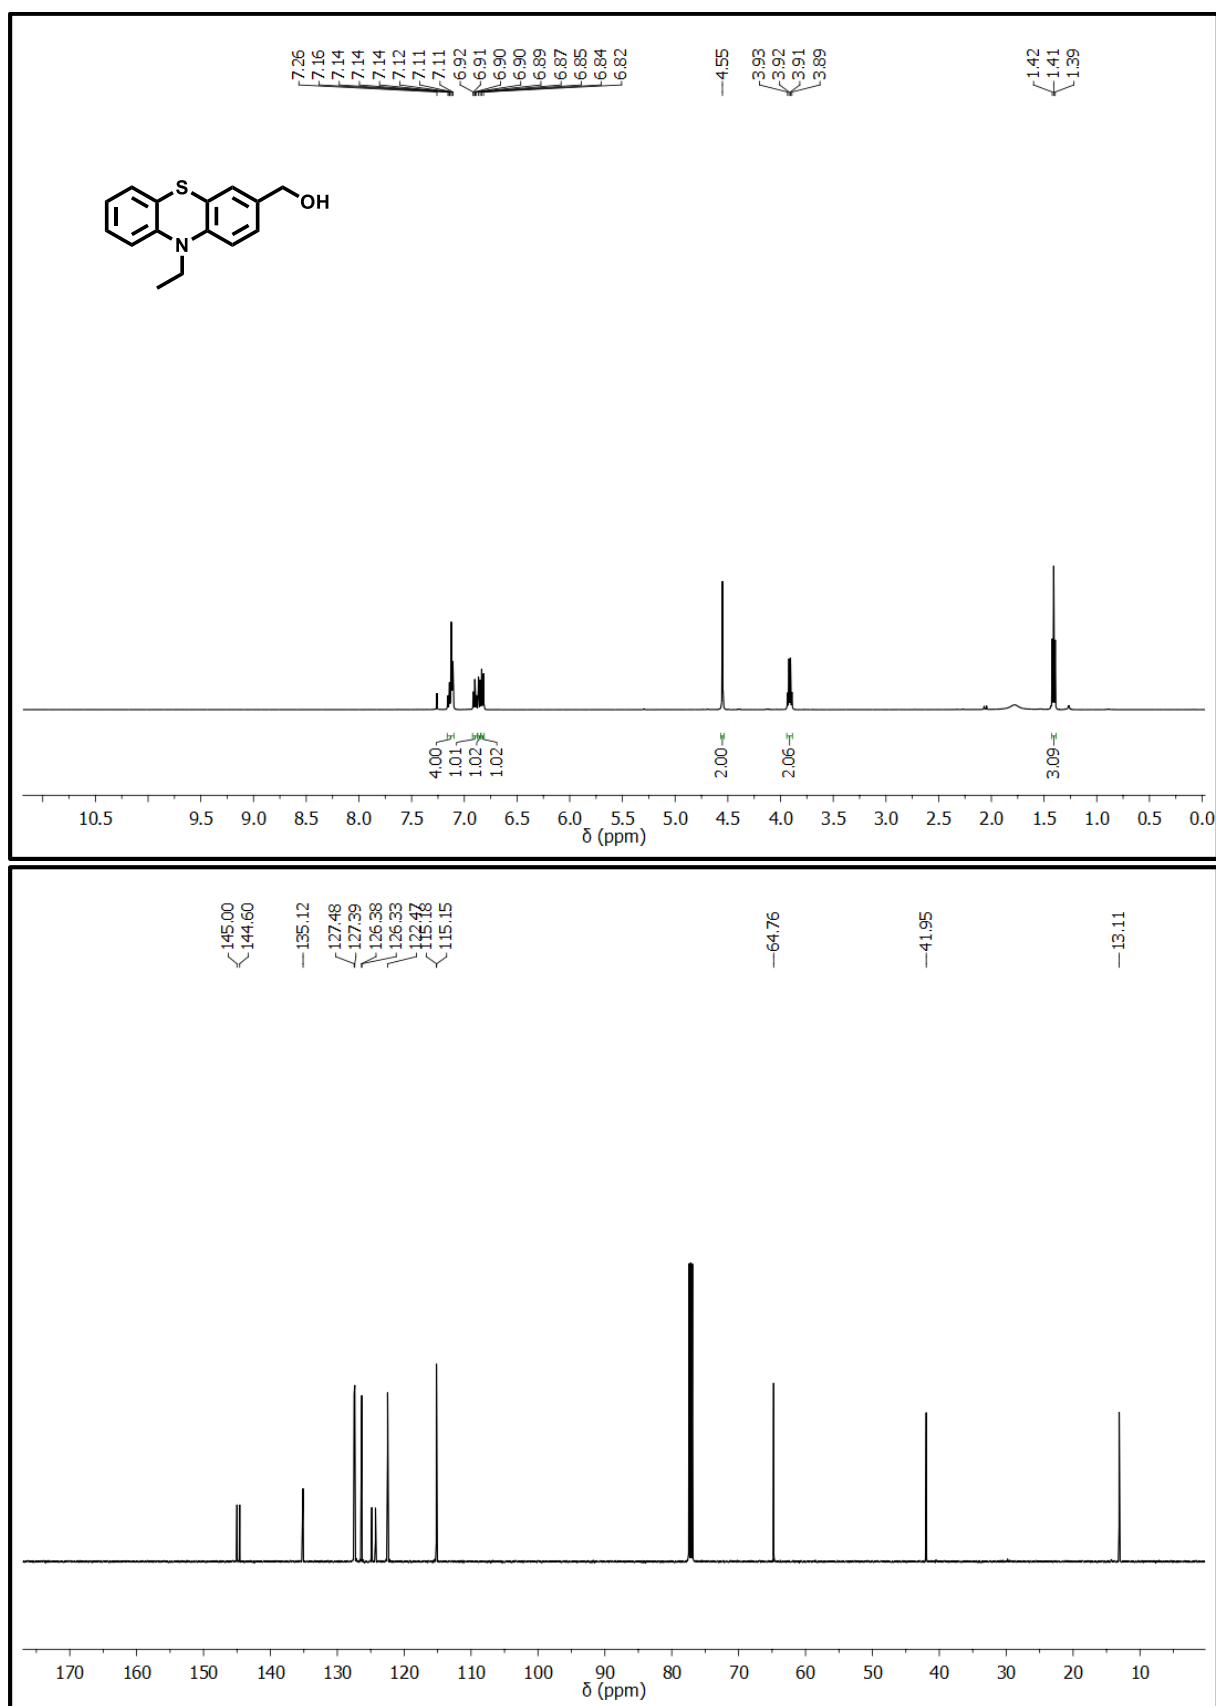

Fig. S1  $^1\text{H}$  (500 MHz,  $\text{CDCl}_3$ ) and  $^{13}\text{C}$  (126 MHz,  $\text{CDCl}_3$ ) NMR spectra of **3**.

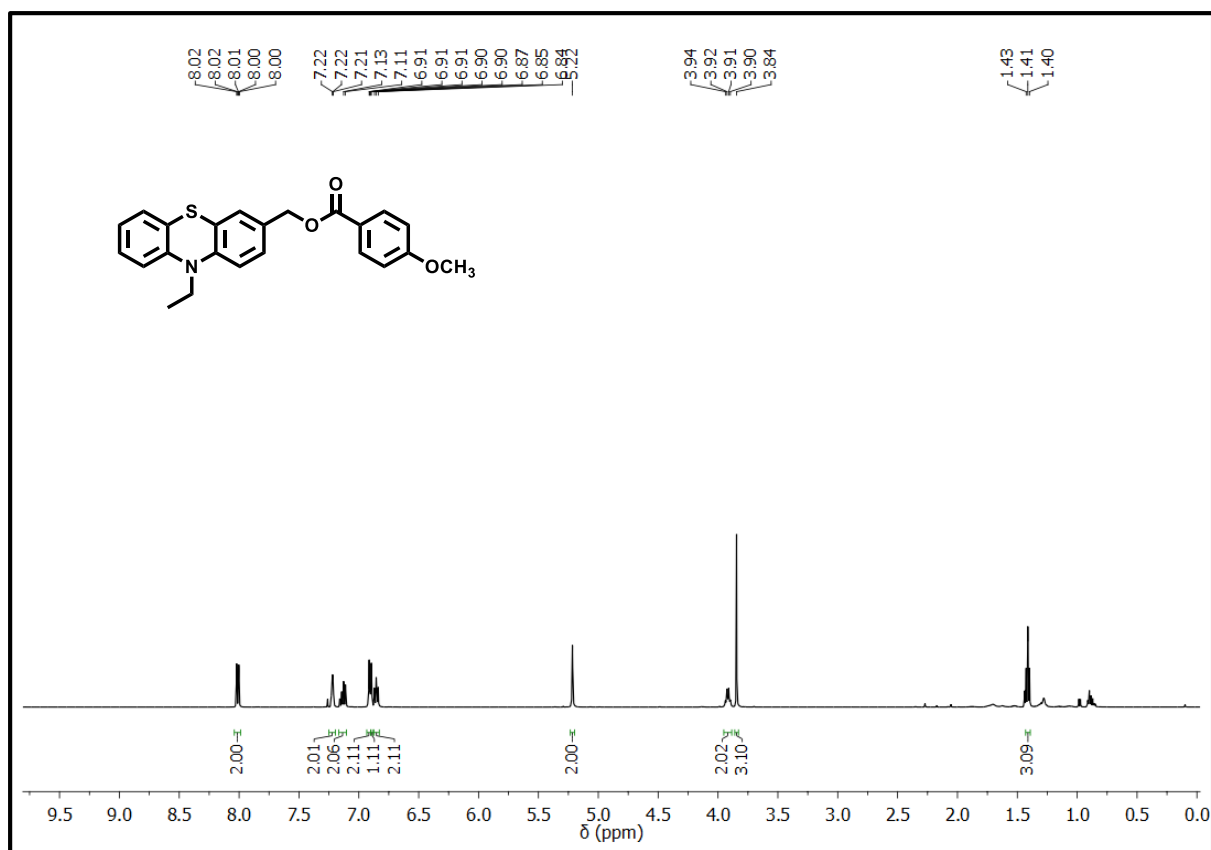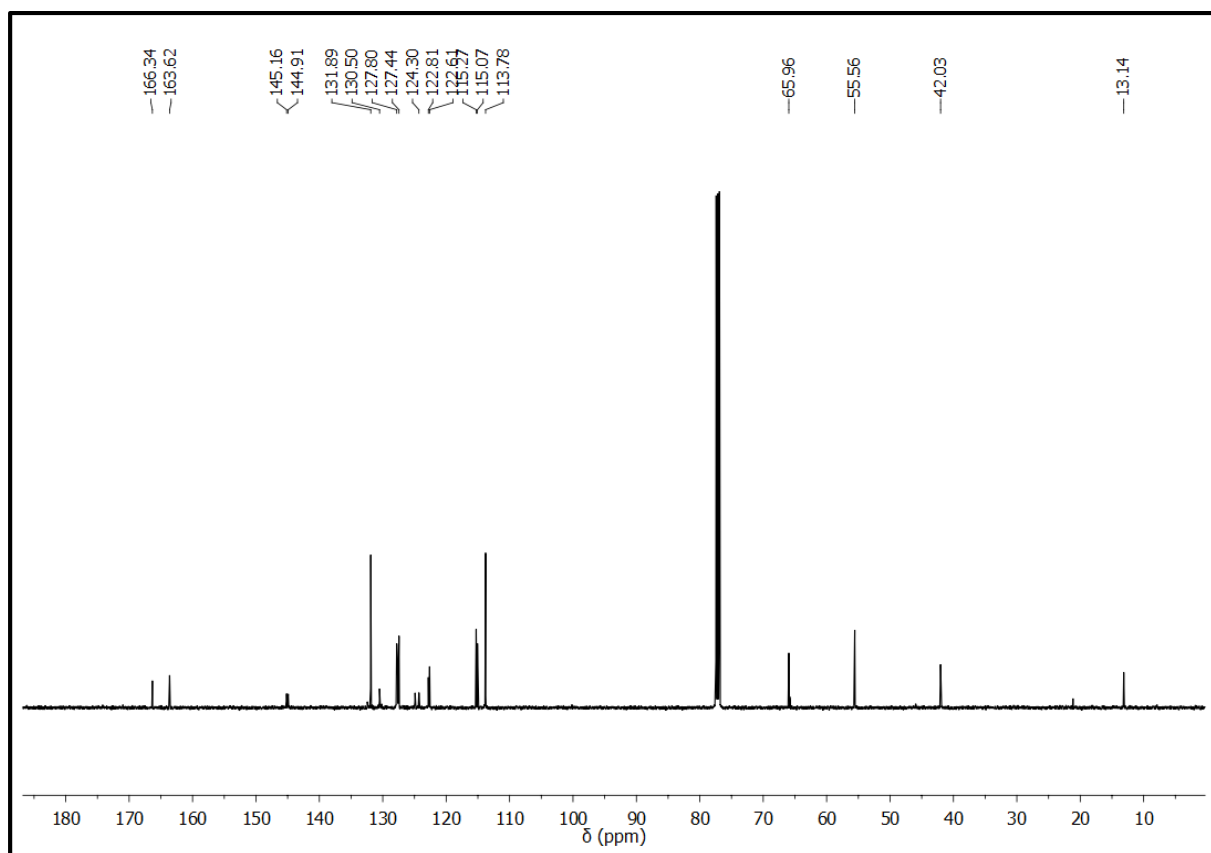

Fig. S2 <sup>1</sup>H (500 MHz, CDCl<sub>3</sub>) and <sup>13</sup>C (126 MHz, CDCl<sub>3</sub>) NMR spectra of **4a**.

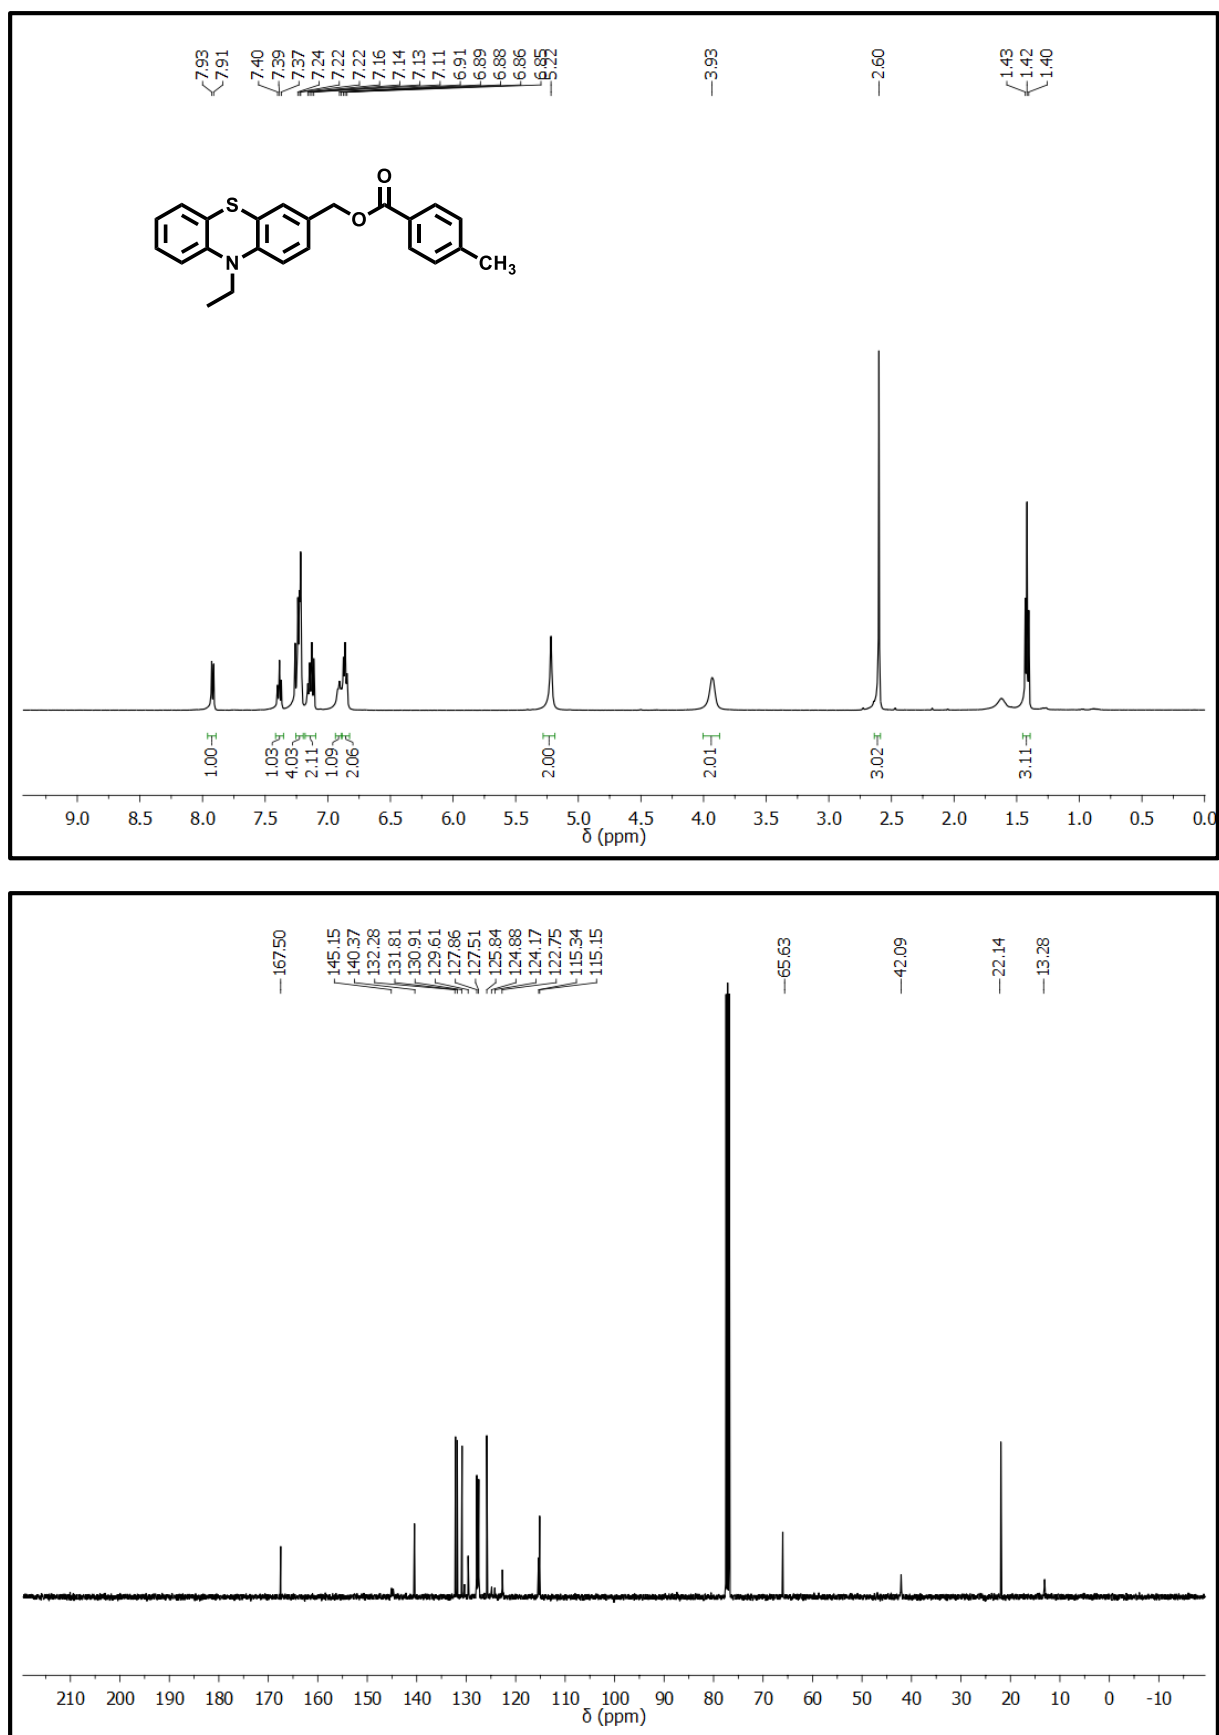

Fig. S3 <sup>1</sup>H (500 MHz, CDCl<sub>3</sub>) and <sup>13</sup>C (101 MHz, CDCl<sub>3</sub>) NMR spectra of **4b**.

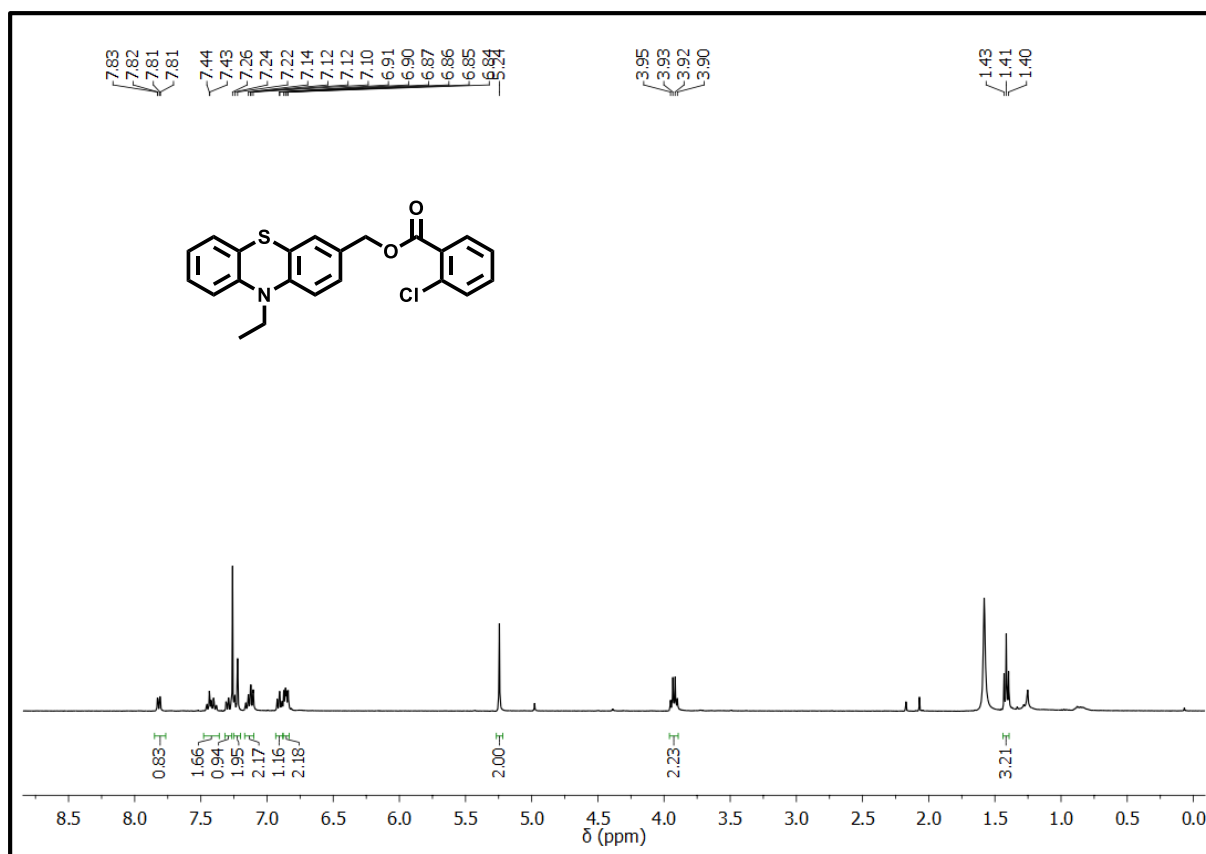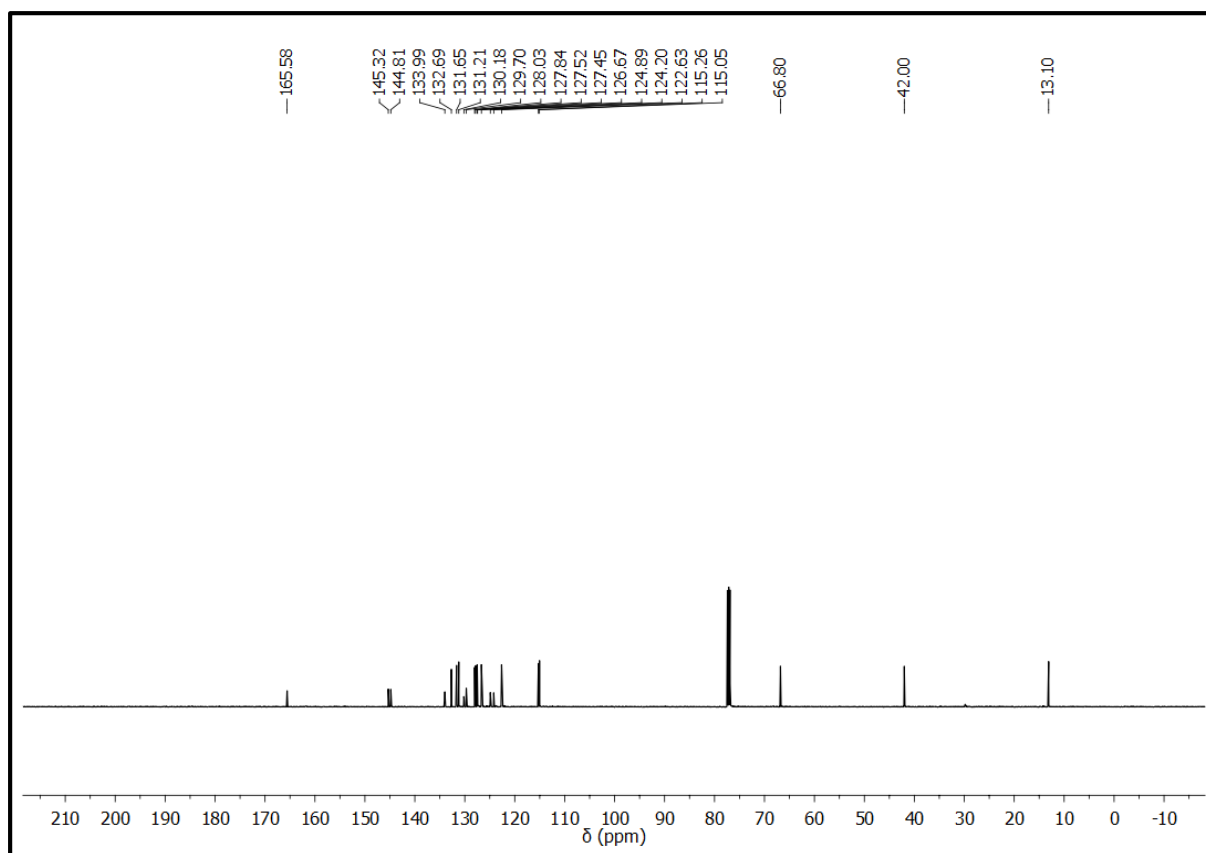

**Fig. S4** <sup>1</sup>H (400 MHz, CDCl<sub>3</sub>) and <sup>13</sup>C (126 MHz, CDCl<sub>3</sub>) NMR spectra of **4c**.

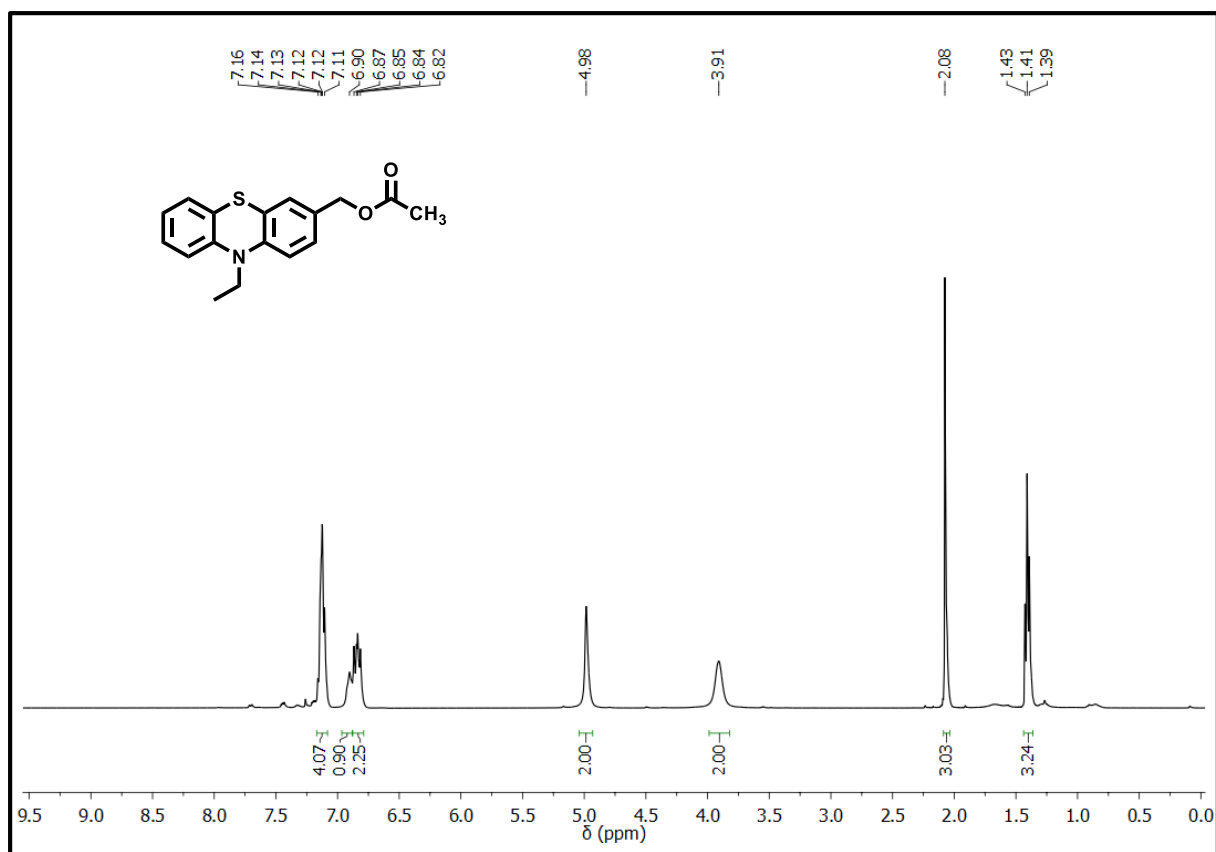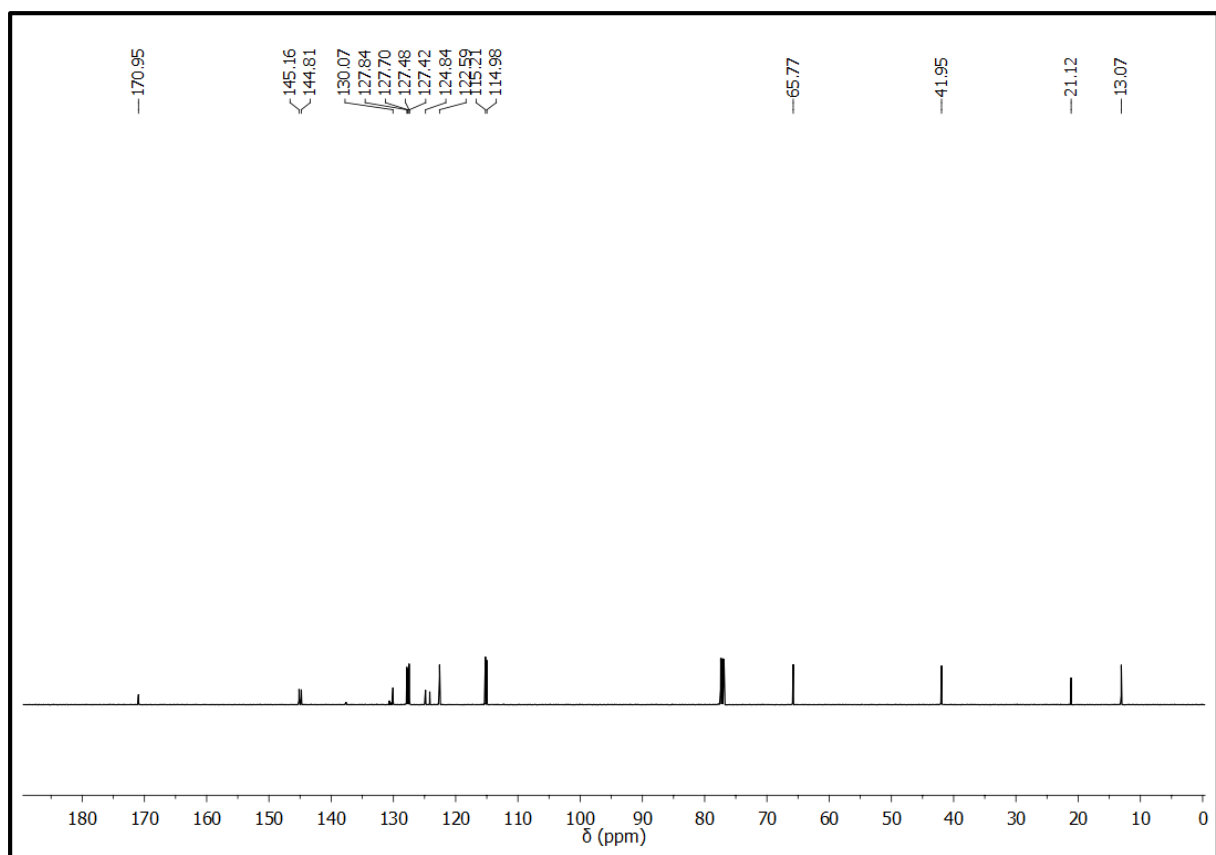

**Fig. S5** <sup>1</sup>H (400 MHz, CDCl<sub>3</sub>) and <sup>13</sup>C (126 MHz, CDCl<sub>3</sub>) NMR spectra of **4d**.



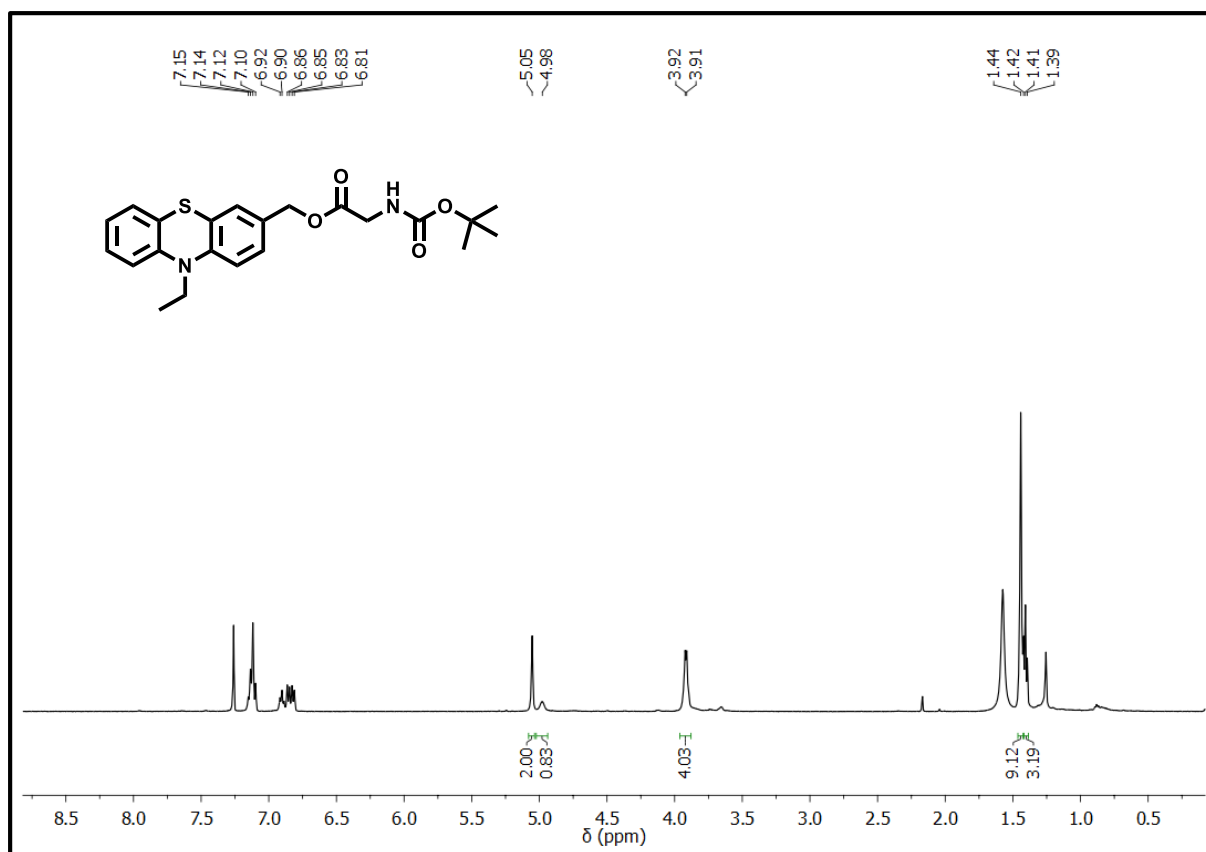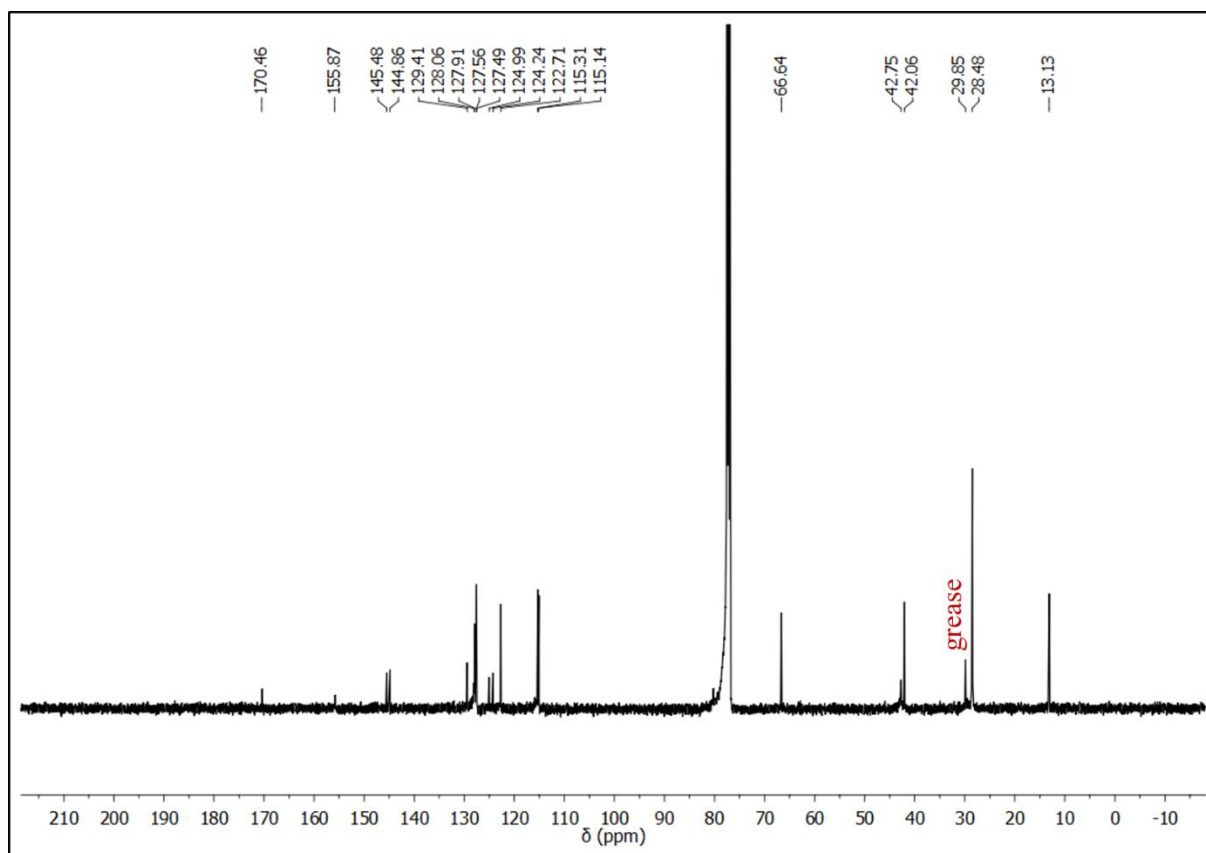

Fig. S6  $^1\text{H}$  (500 MHz,  $\text{CDCl}_3$ ) and  $^{13}\text{C}$  (126 MHz,  $\text{CDCl}_3$ ) NMR spectra of 4e.

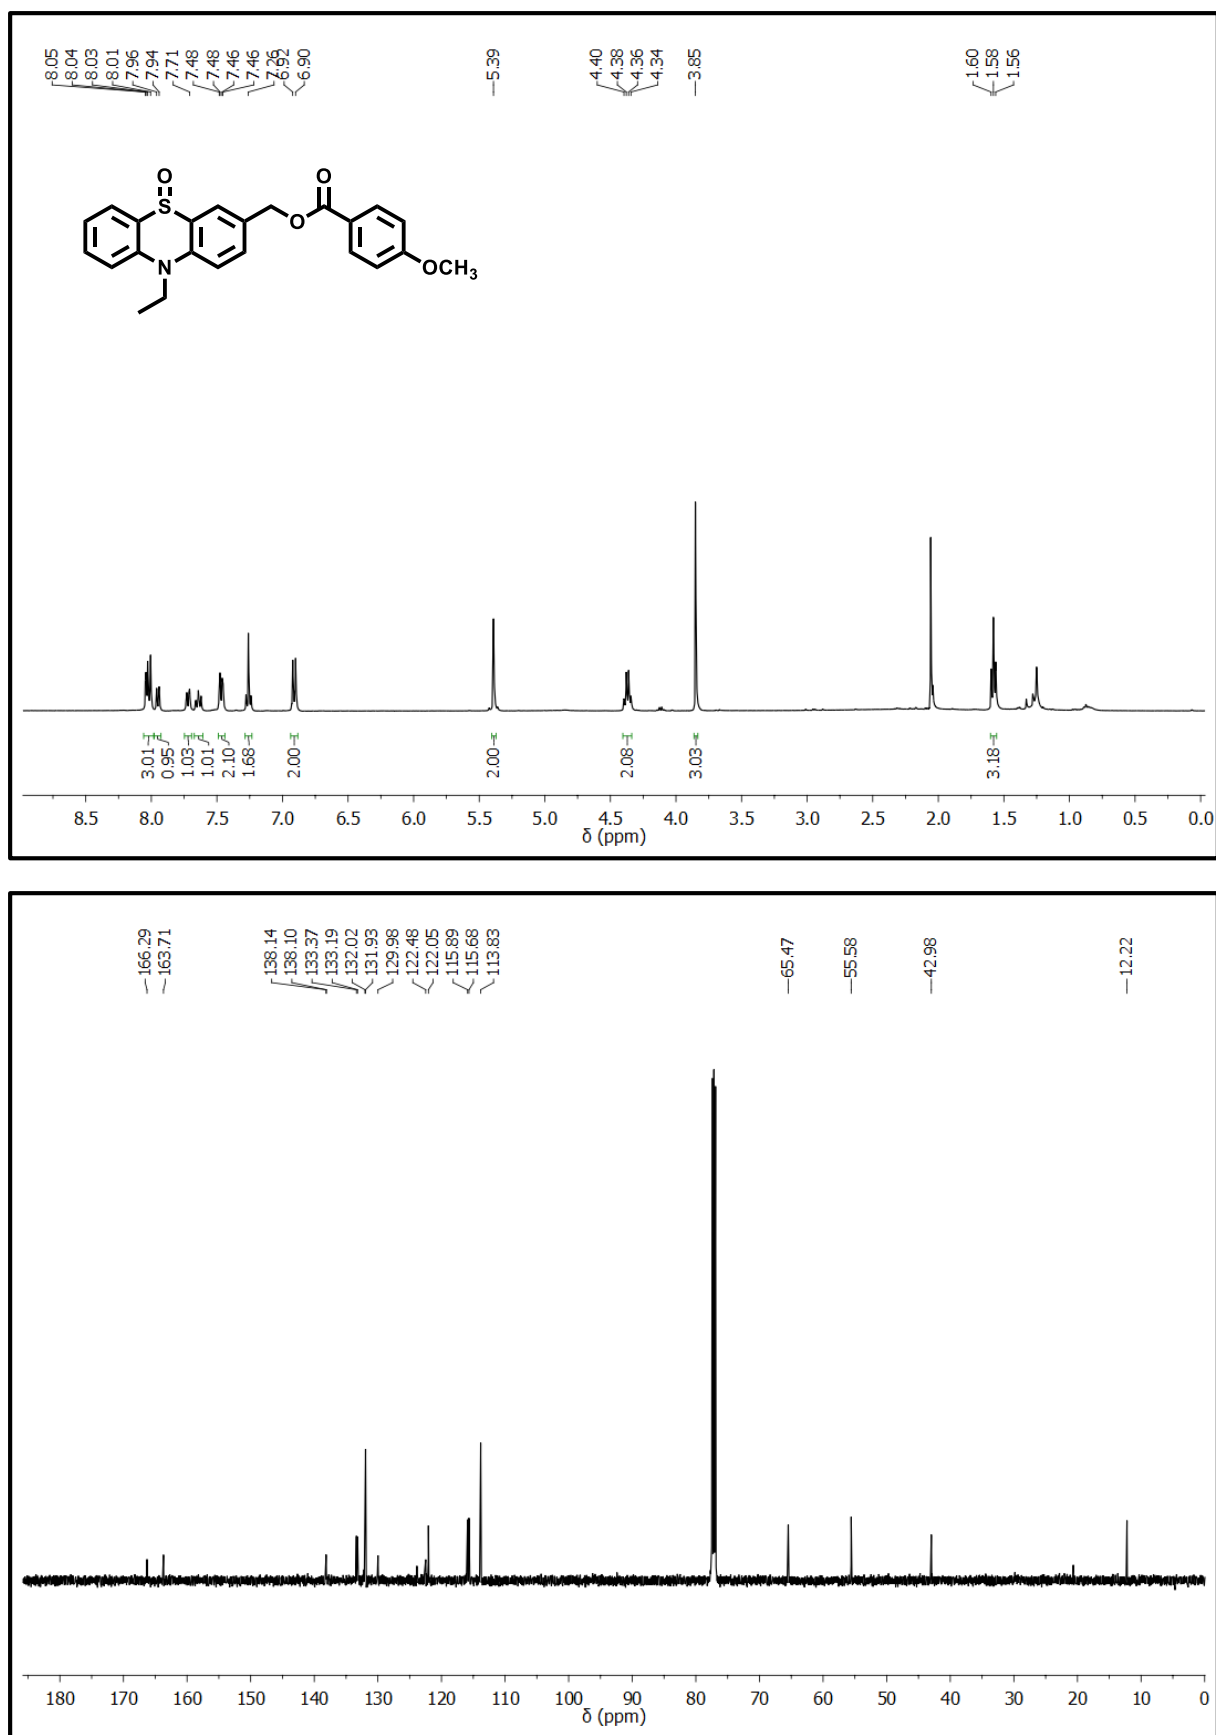

Fig. S7 <sup>1</sup>H (400 MHz, CDCl<sub>3</sub>) and <sup>13</sup>C (126 MHz, CDCl<sub>3</sub>) NMR spectra of **5a**.

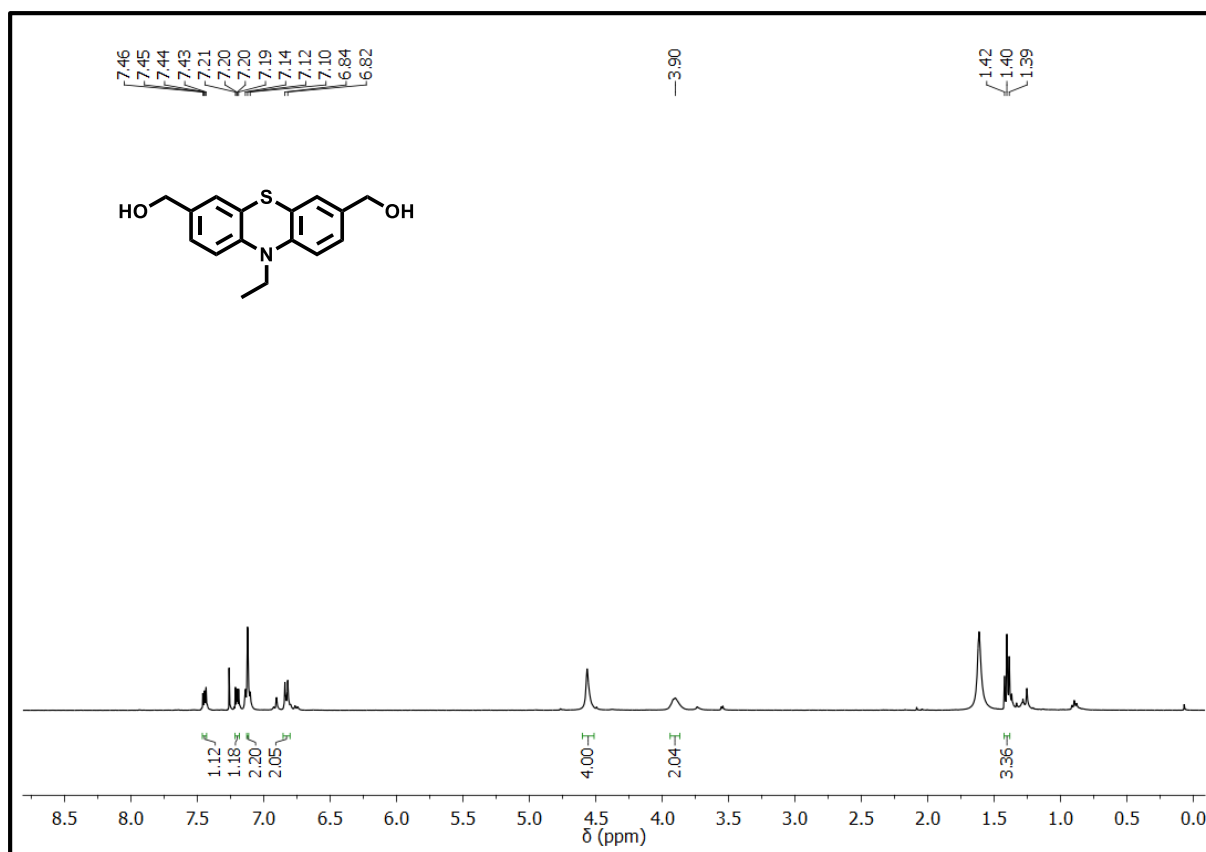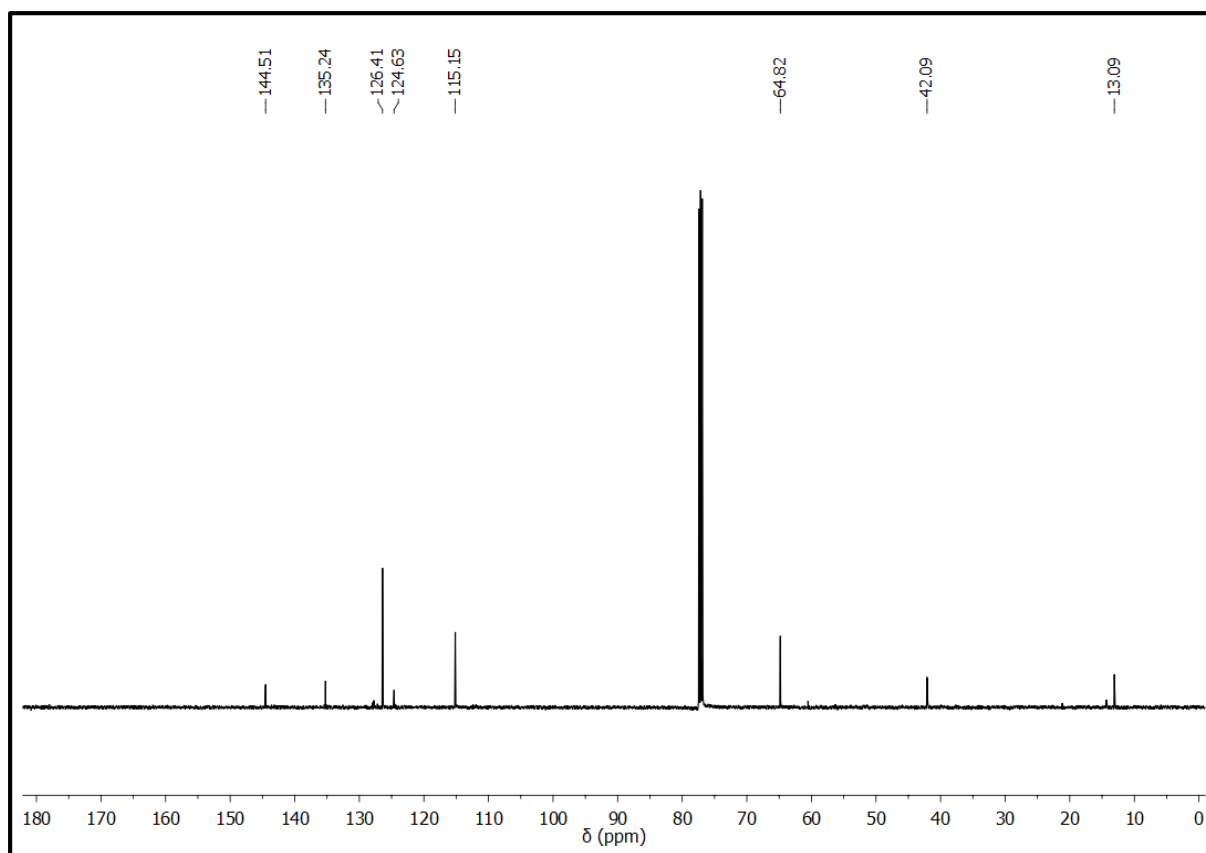

**Fig. S8**  $^1\text{H}$  (400 MHz,  $\text{CDCl}_3$ ) and  $^{13}\text{C}$  (126 MHz,  $\text{CDCl}_3$ ) NMR spectra of **7**.

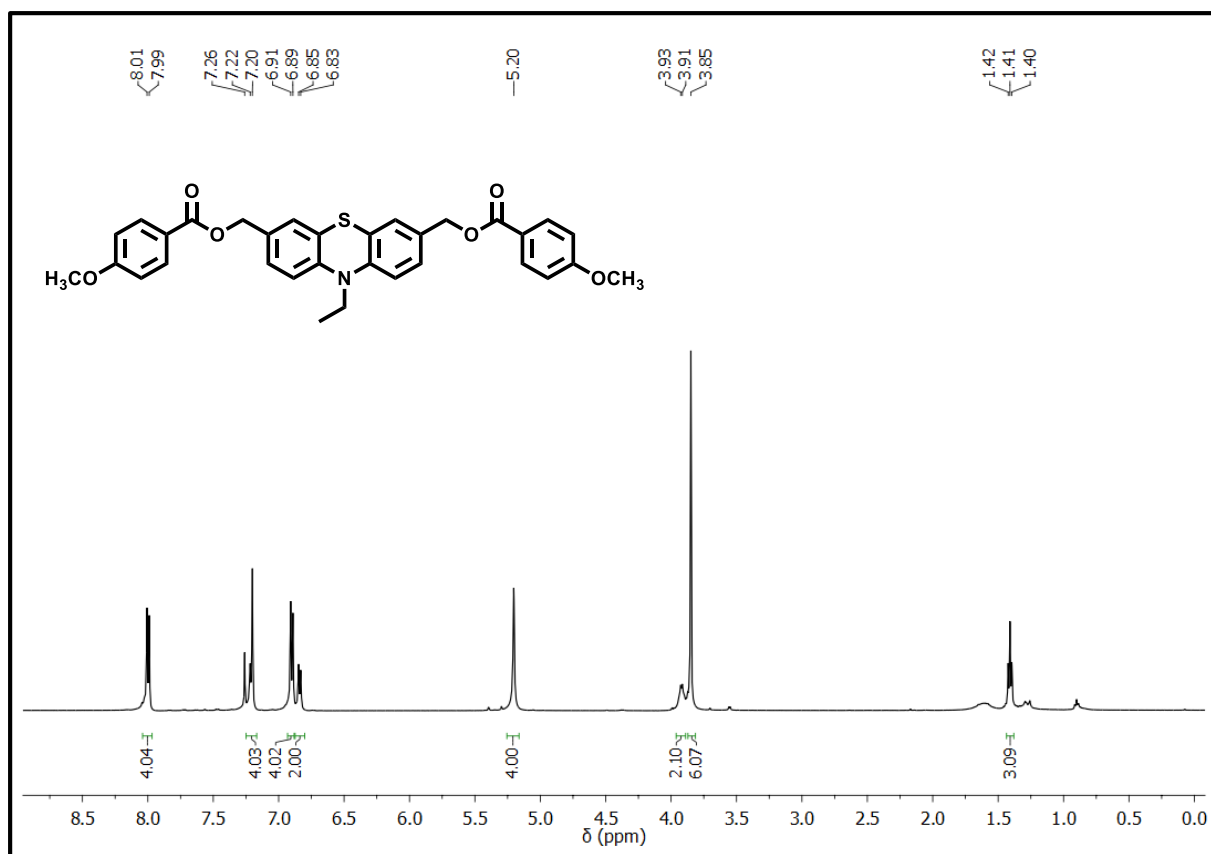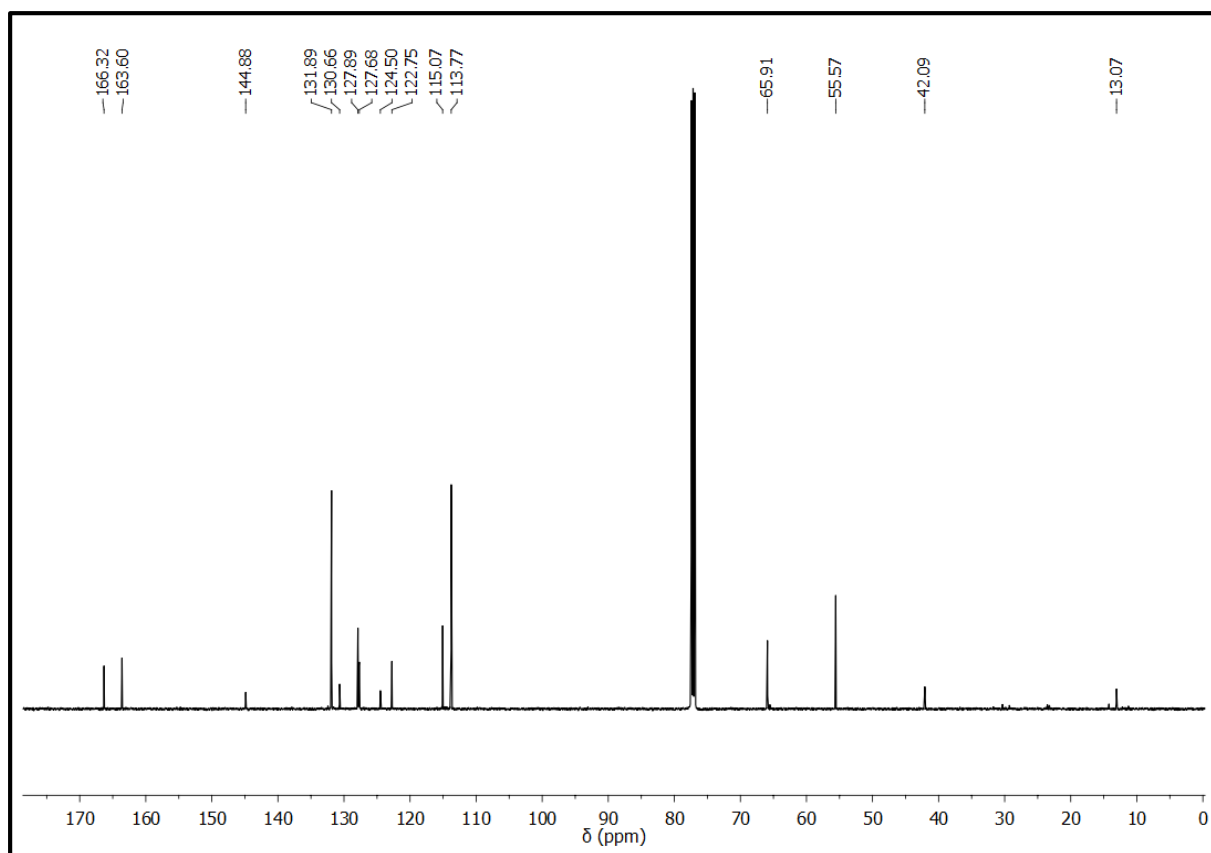

**Fig. S9** <sup>1</sup>H (500 MHz, CDCl<sub>3</sub>) and <sup>13</sup>C (126 MHz, CDCl<sub>3</sub>) NMR spectra of **8a**.

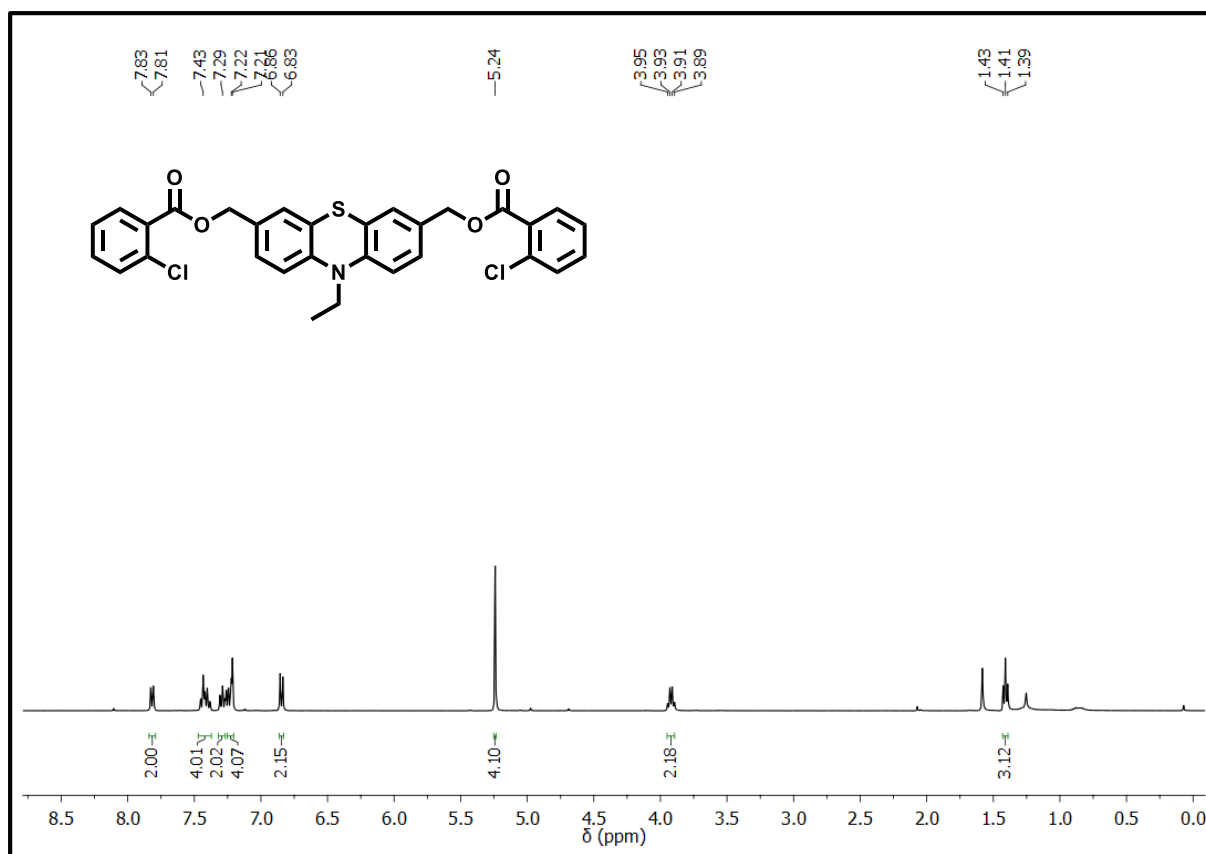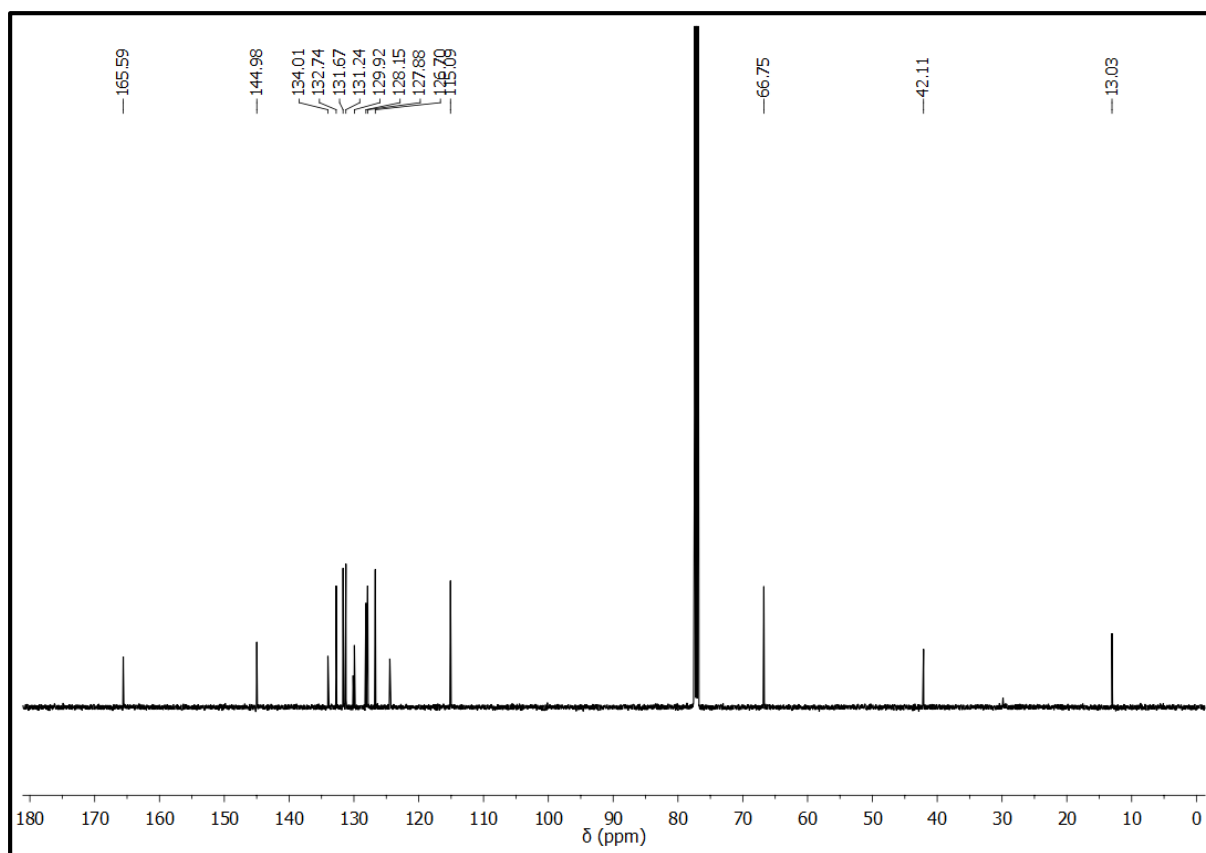

**Fig. S10**  $^1\text{H}$  (400 MHz,  $\text{CDCl}_3$ ) and  $^{13}\text{C}$  (126 MHz,  $\text{CDCl}_3$ ) NMR spectra of **8b**.

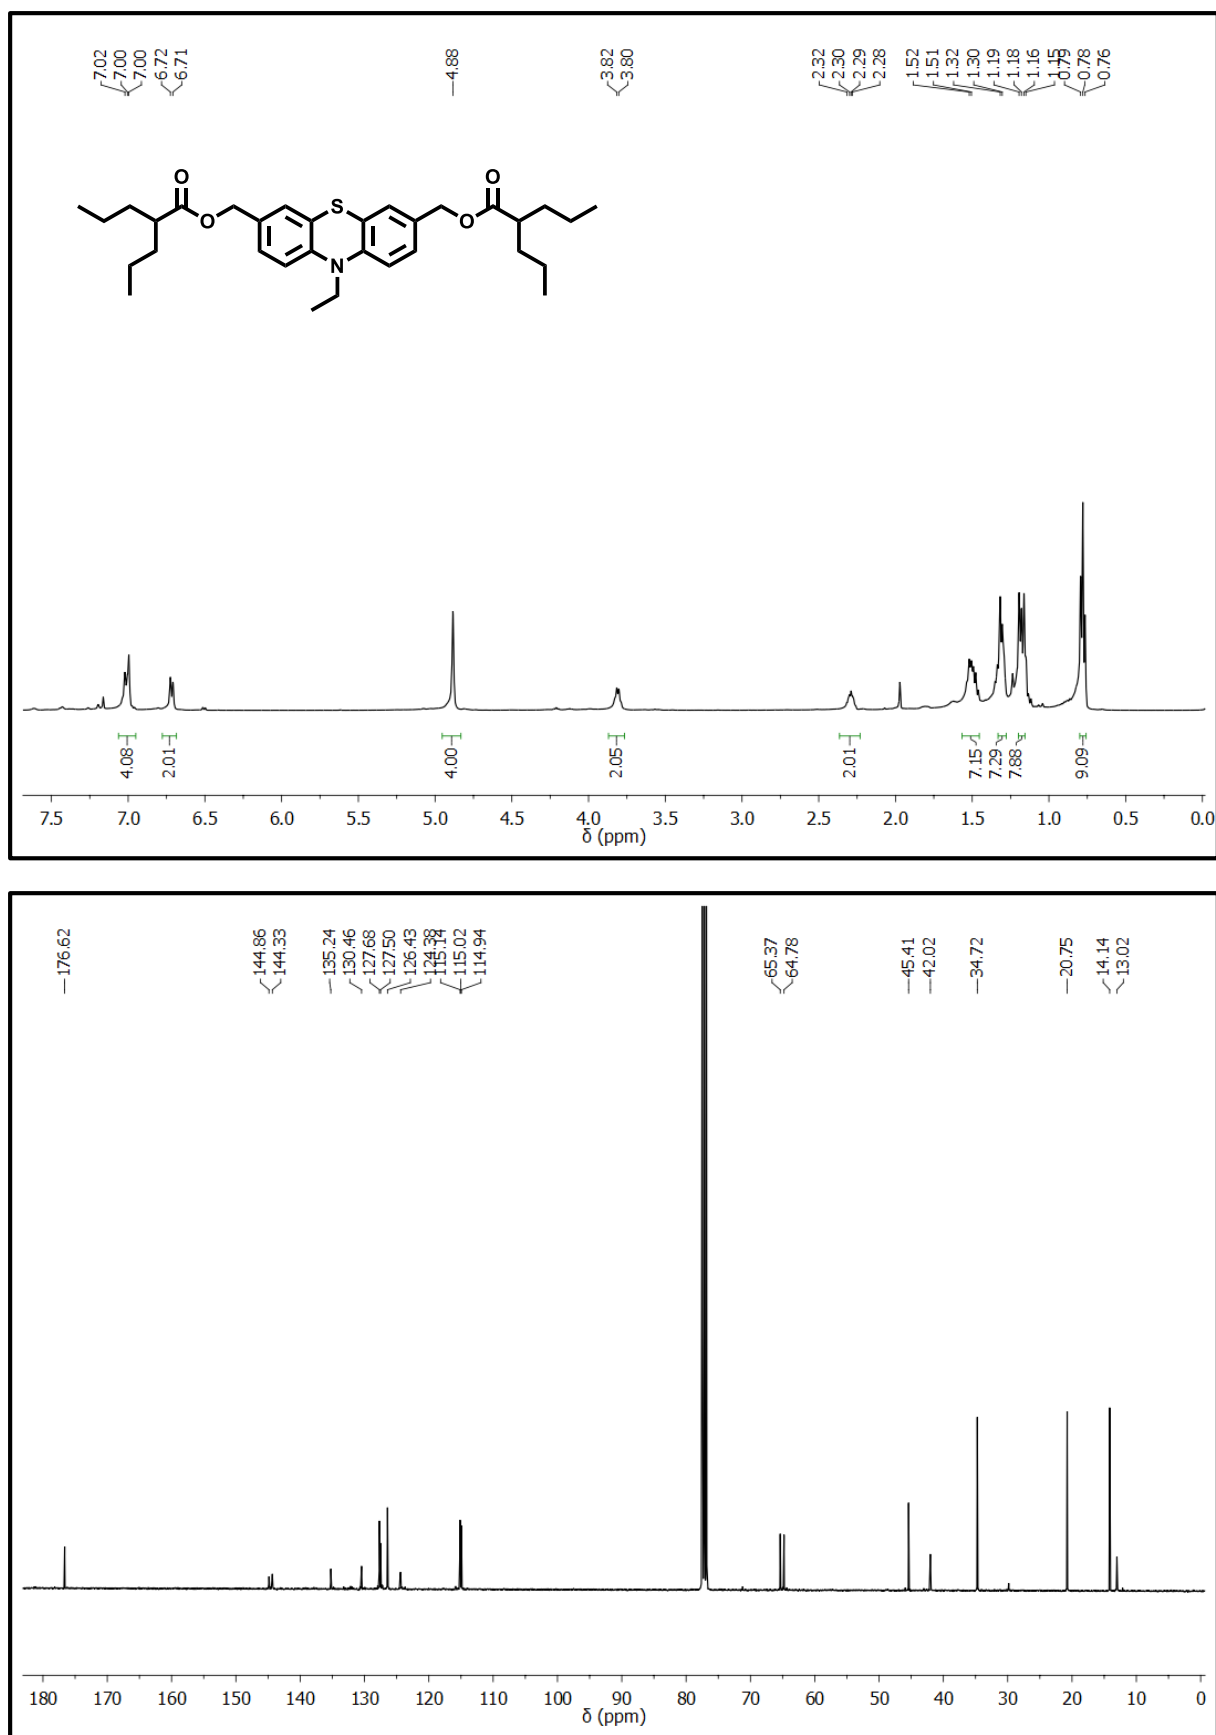

**Fig. S11**  $^1\text{H}$  (500 MHz,  $\text{CDCl}_3$ ) and  $^{13}\text{C}$  (101 MHz,  $\text{CDCl}_3$ ) NMR spectra of **8c**.

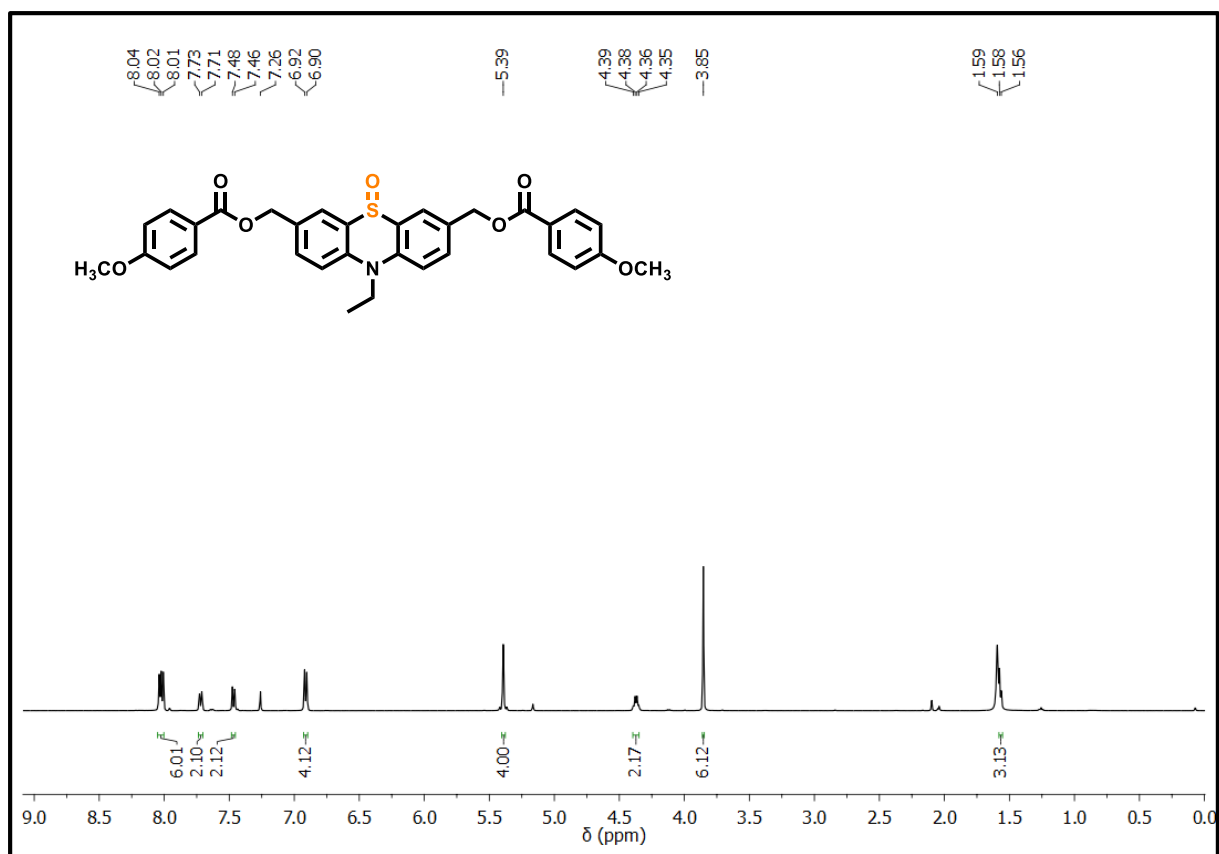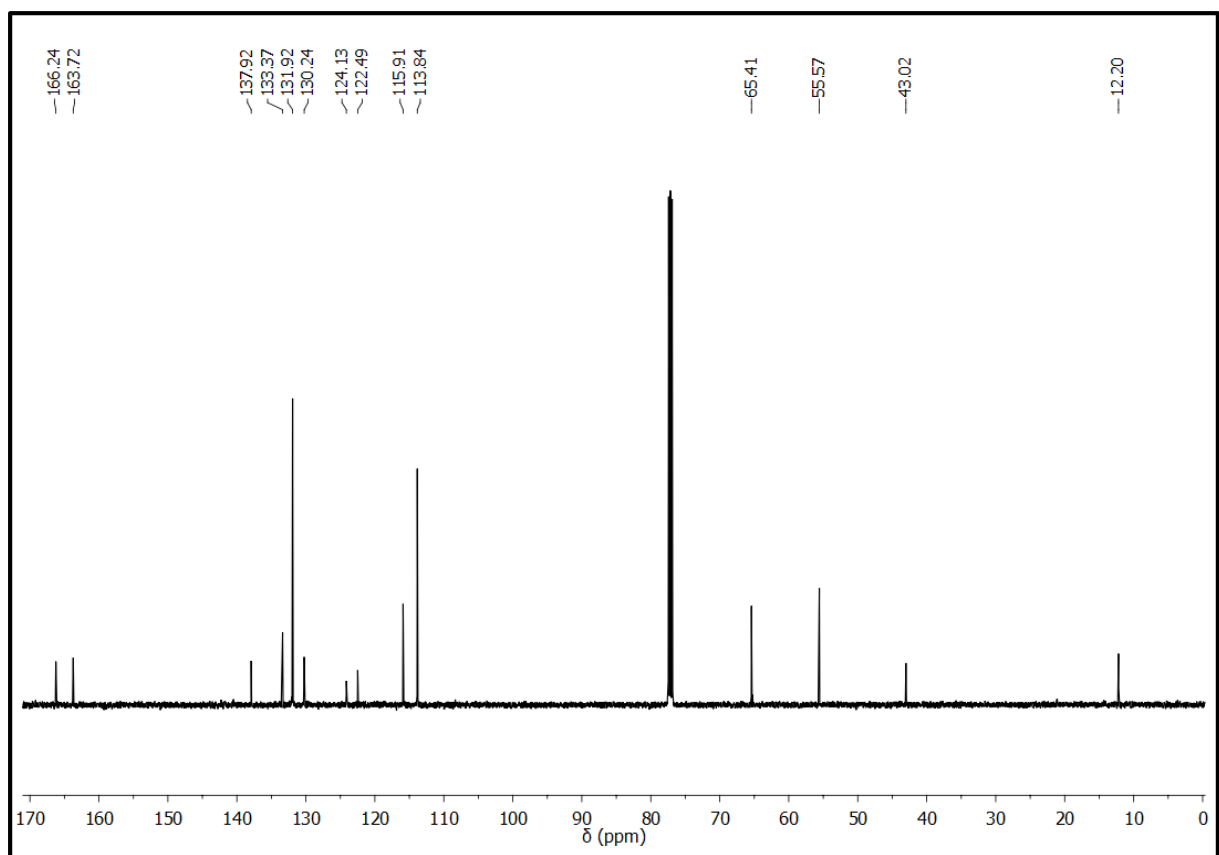

**Fig. S12**  $^1\text{H}$  (500 MHz,  $\text{CDCl}_3$ ) and  $^{13}\text{C}$  (126 MHz,  $\text{CDCl}_3$ ) NMR spectra of **9a**.

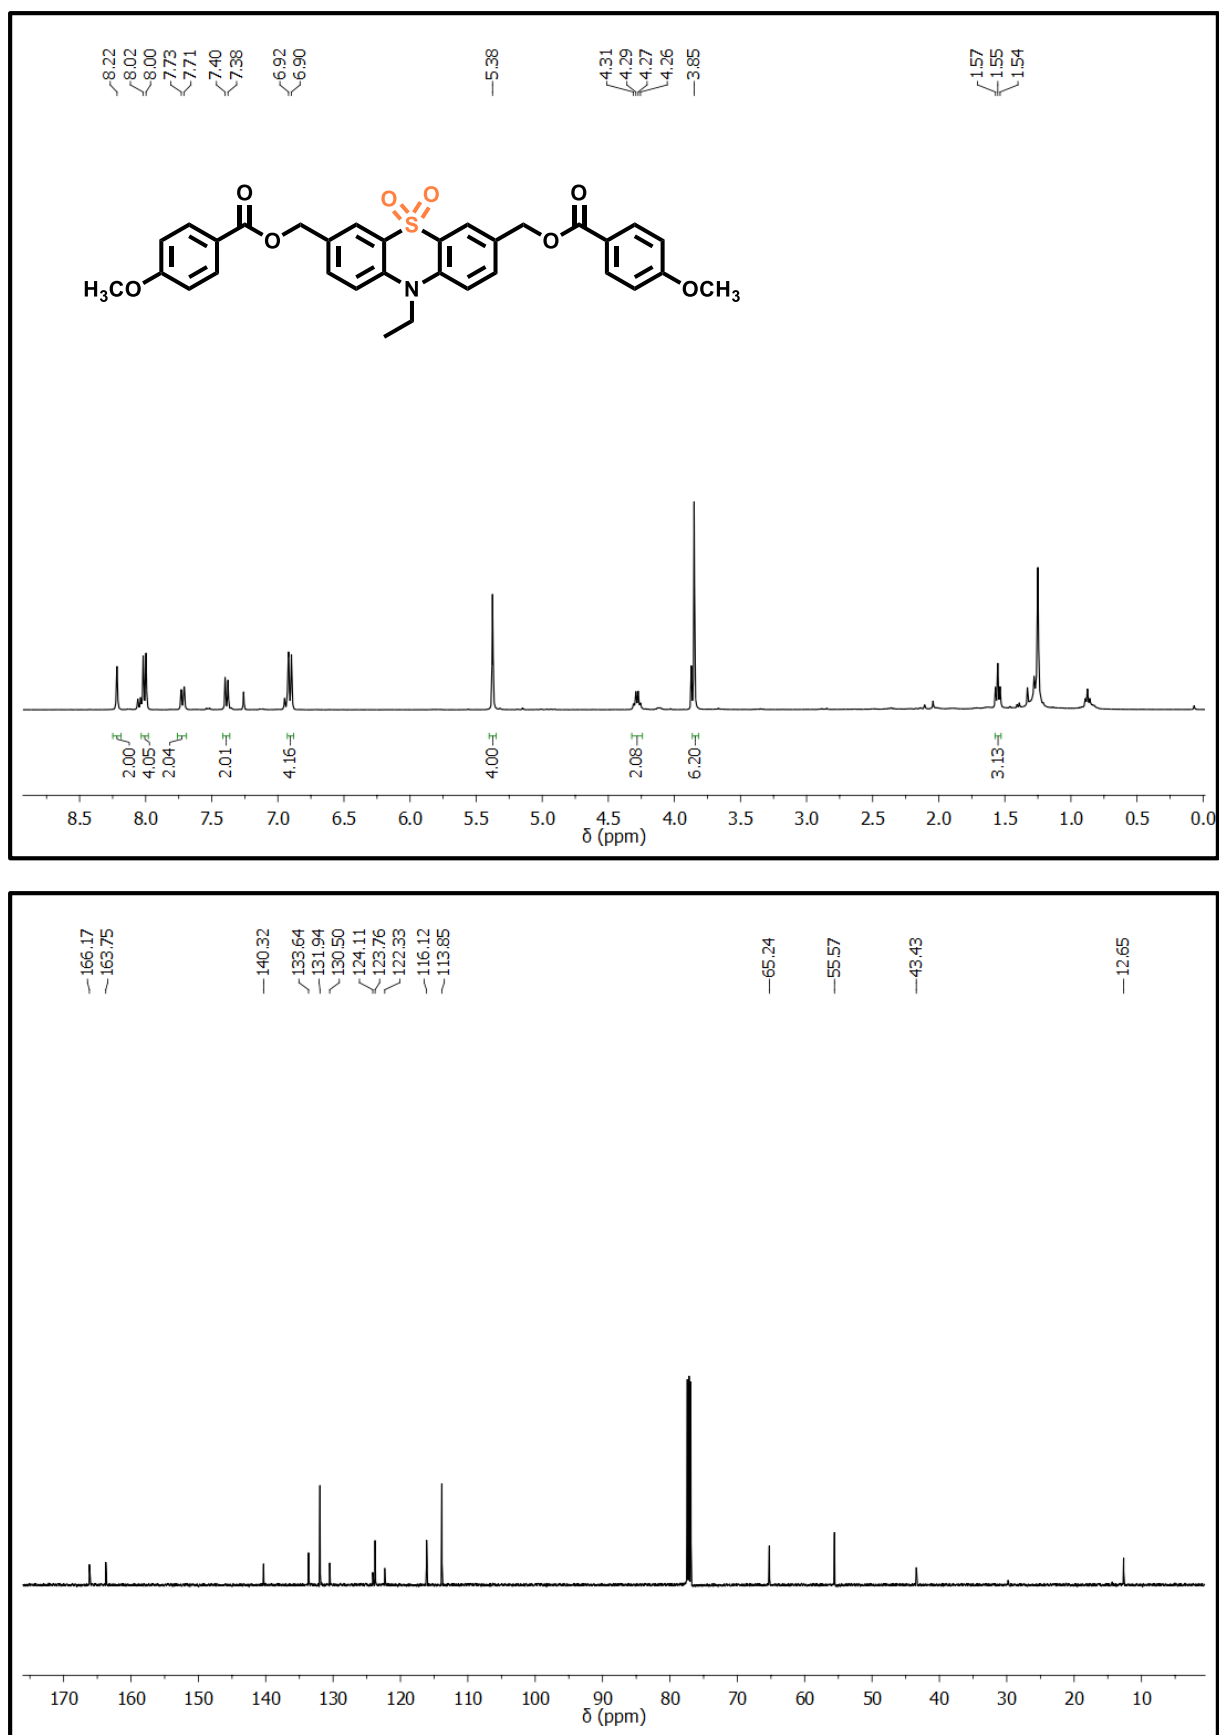

**Fig. S13**  $^1\text{H}$  (400 MHz,  $\text{CDCl}_3$ ) and  $^{13}\text{C}$  (101 MHz,  $\text{CDCl}_3$ ) NMR spectra of **10a**.



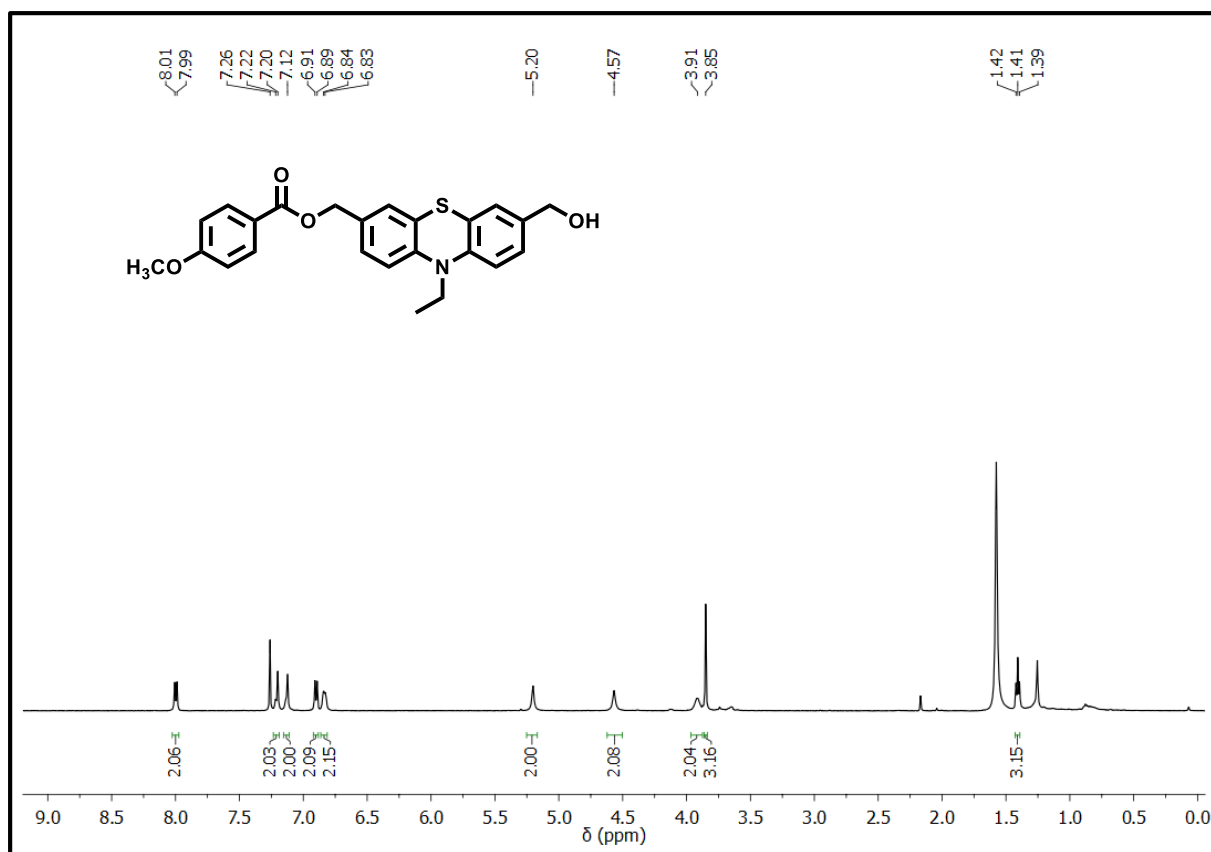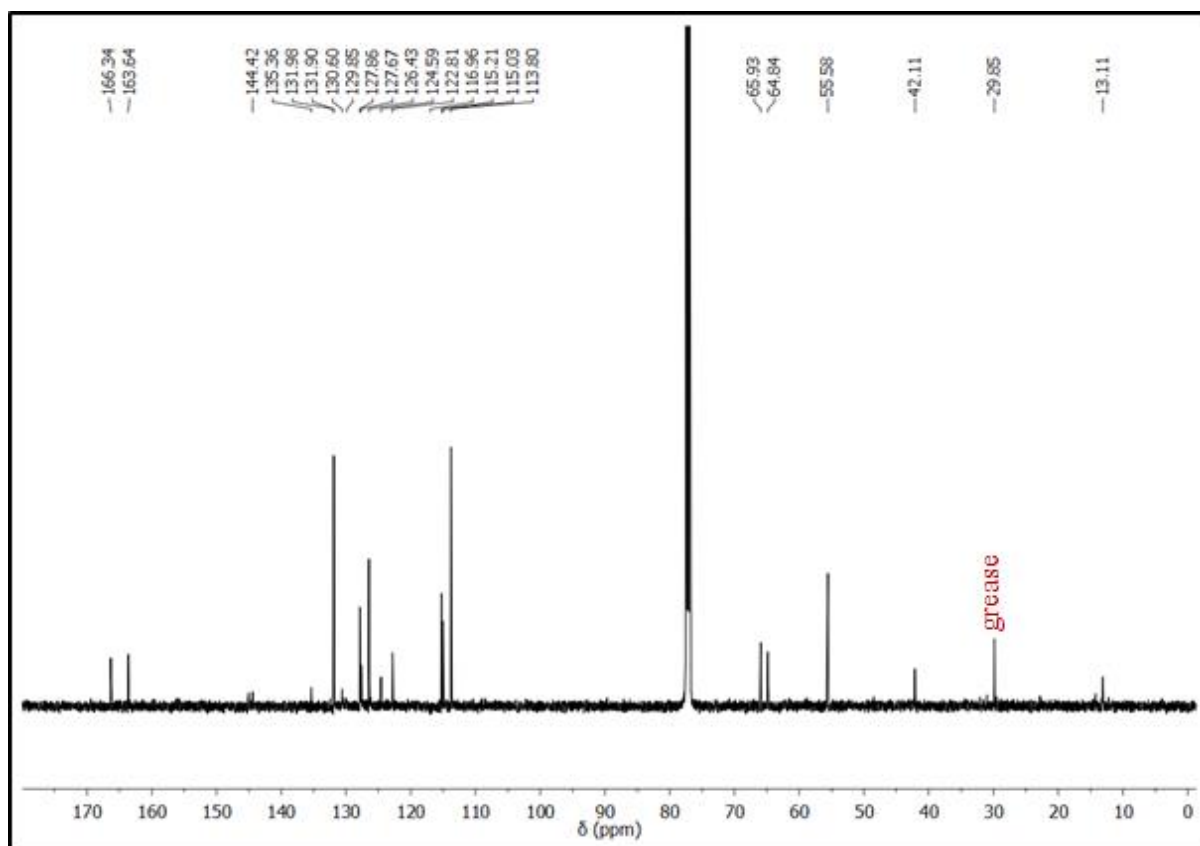

Fig. S14 <sup>1</sup>H (500 MHz, CDCl<sub>3</sub>) and <sup>13</sup>C (126 MHz, CDCl<sub>3</sub>) NMR spectra of 11.

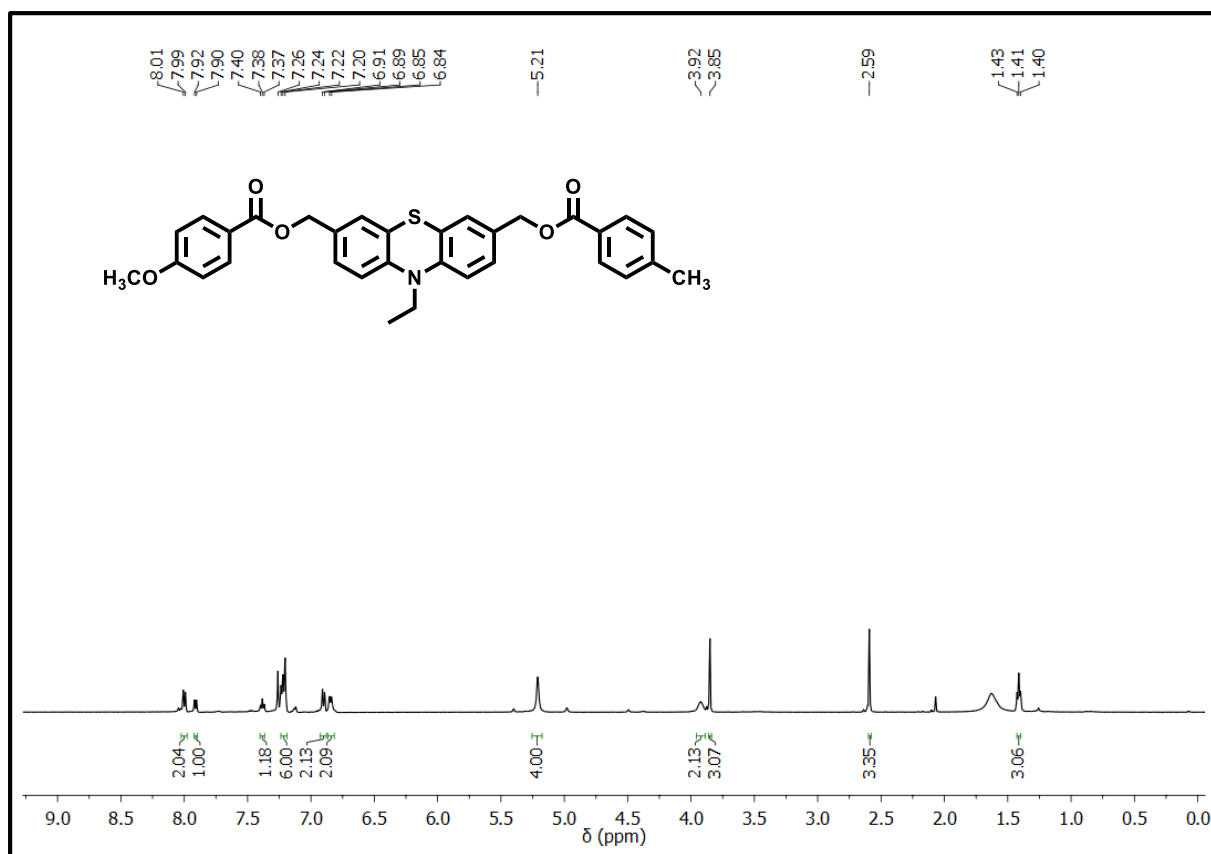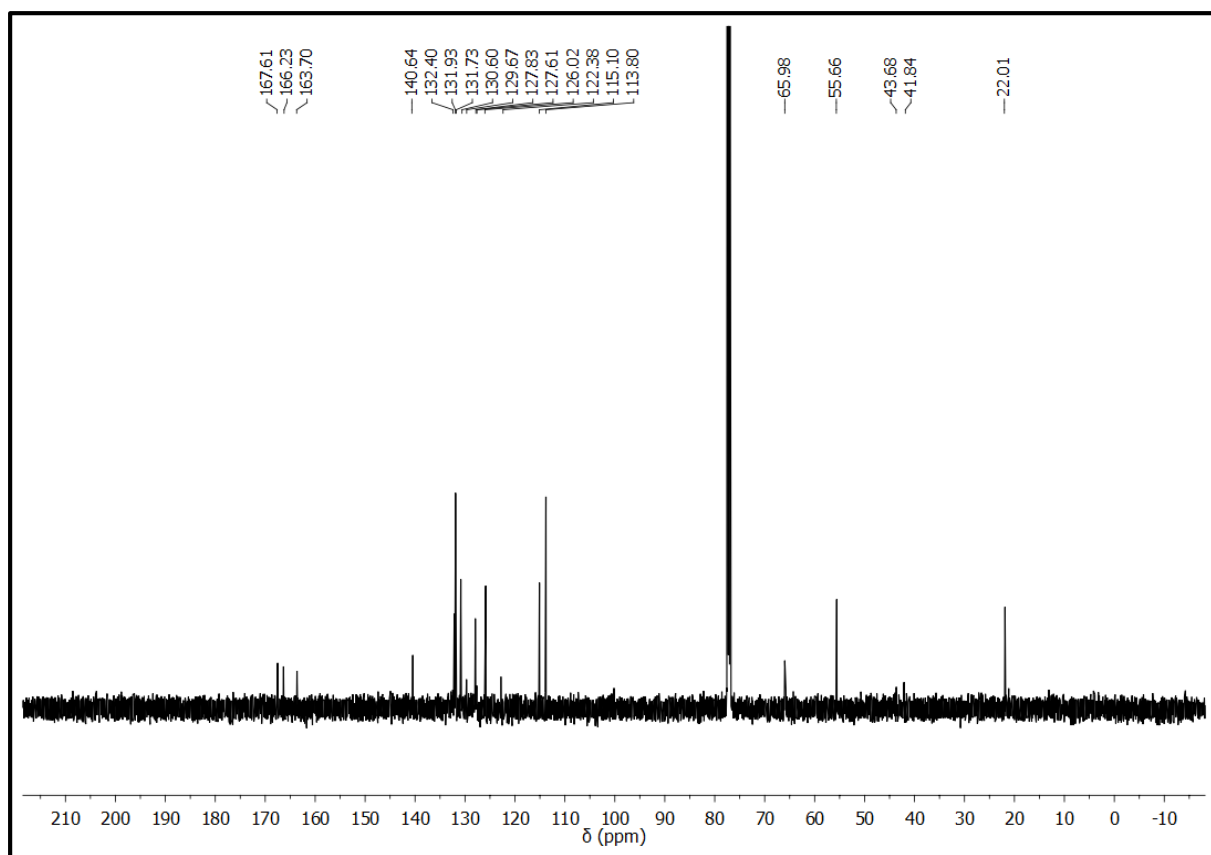

**Fig. S15** <sup>1</sup>H (500 MHz, CDCl<sub>3</sub>) and <sup>13</sup>C (126 MHz, CDCl<sub>3</sub>) NMR spectra of **12a**.

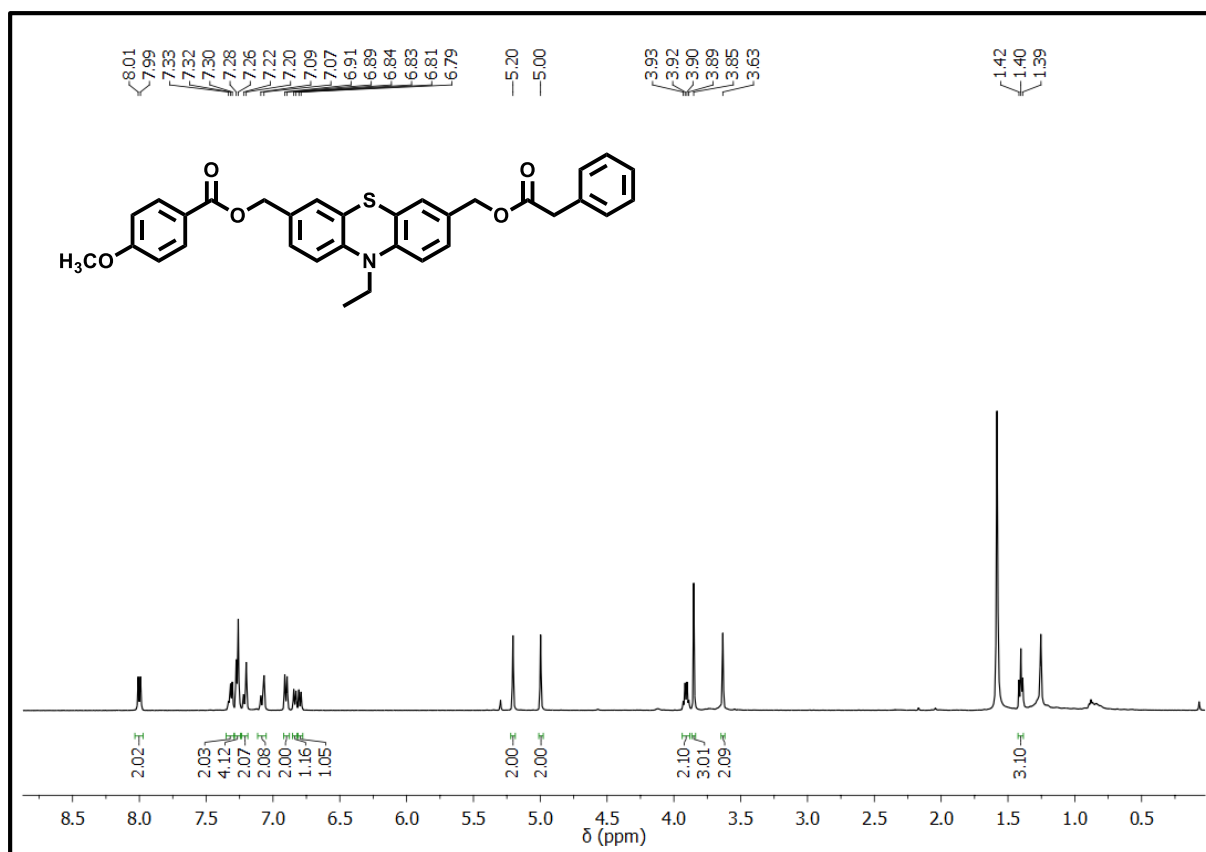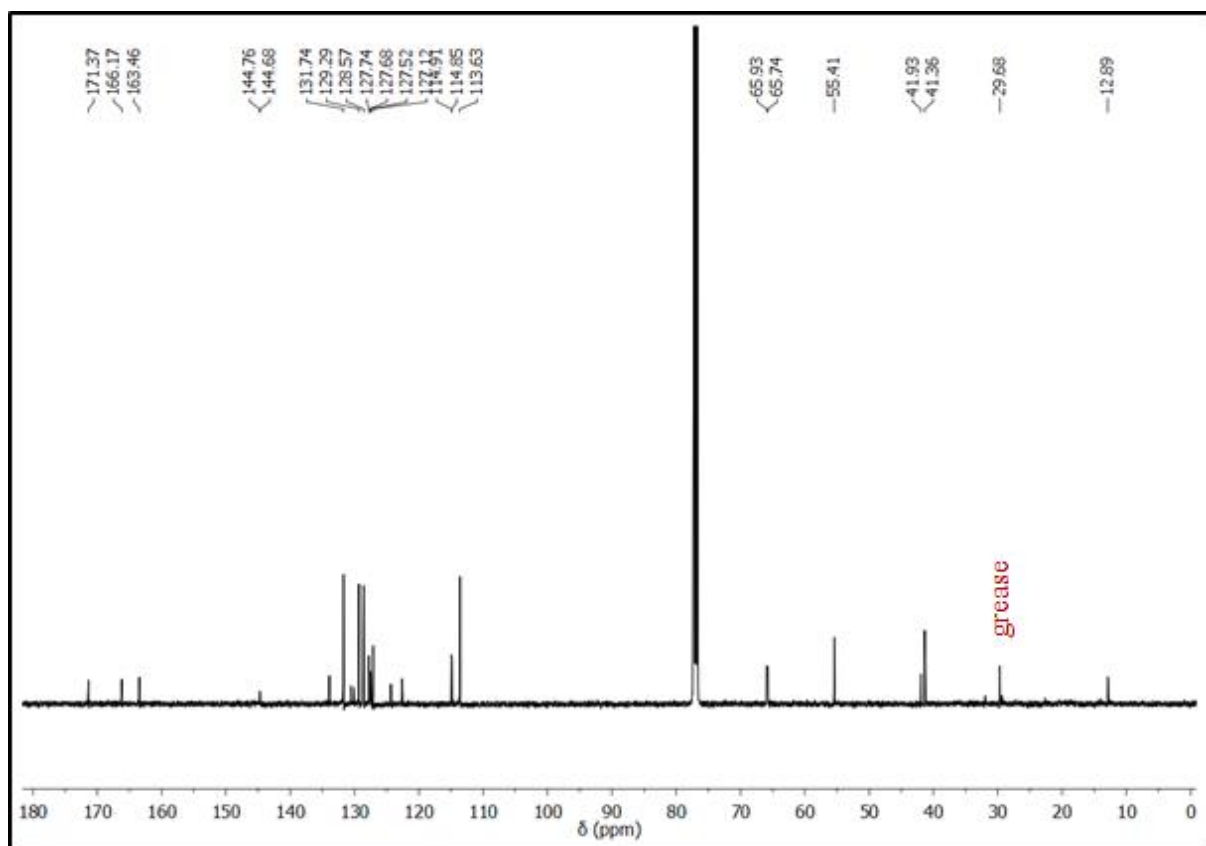

Fig. S16  $^1\text{H}$  (500 MHz,  $\text{CDCl}_3$ ) and  $^{13}\text{C}$  (126 MHz,  $\text{CDCl}_3$ ) NMR spectra of **12b**.

## 5. HRMS spectra of caged compounds:

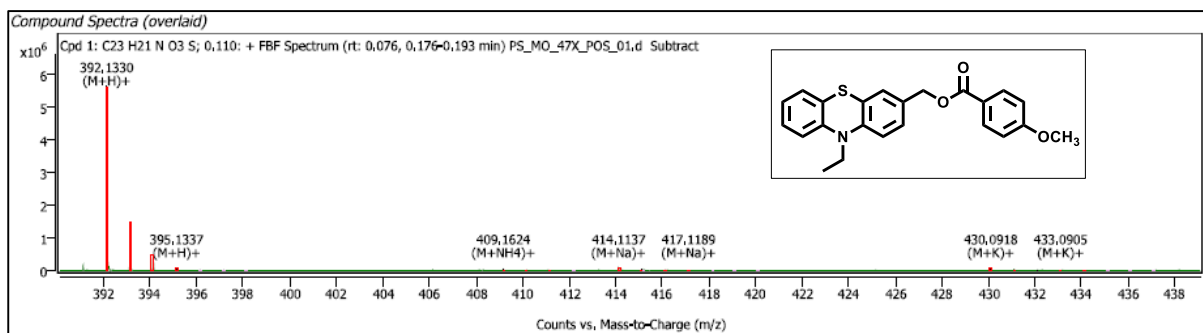

Fig. S17 HRMS spectrum of **4a**.

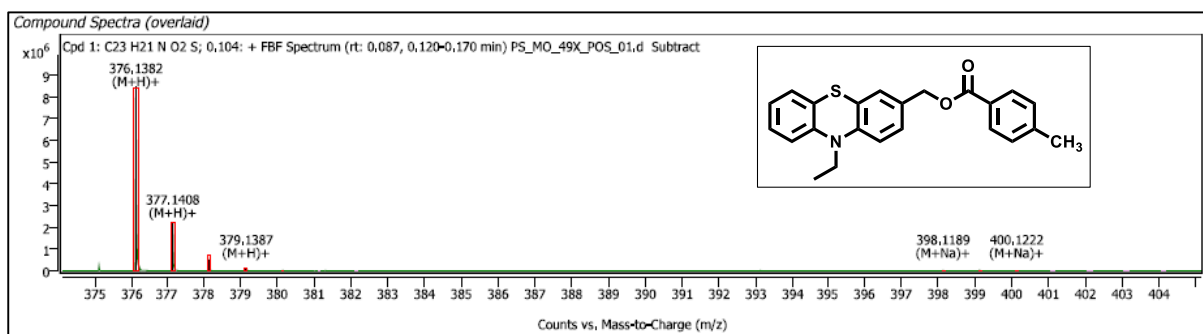

Fig. S18 HRMS spectrum of **4b**.

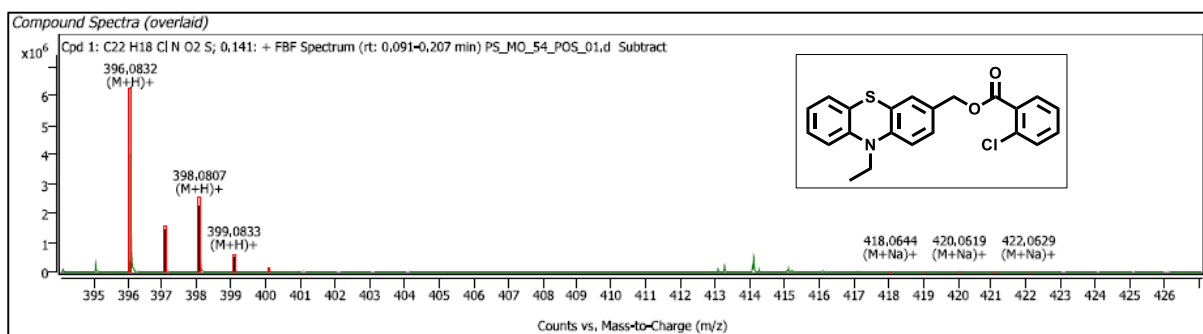

Fig. S19 HRMS spectrum of **4c**.

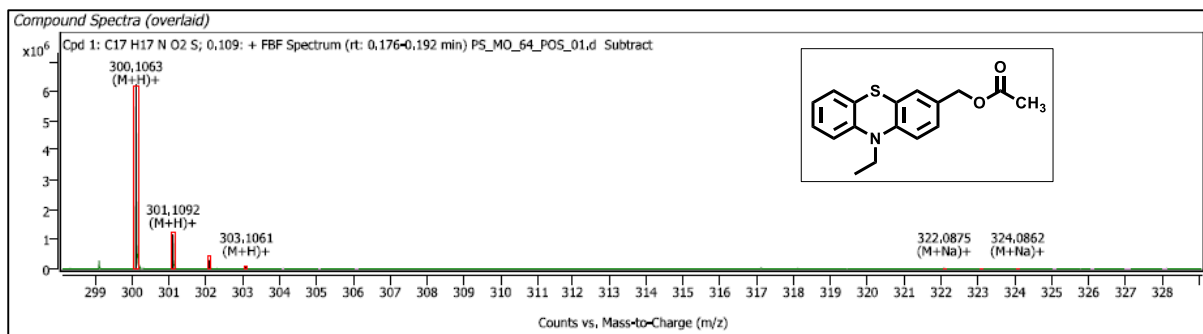

Fig. S20 HRMS spectrum of **4d**.

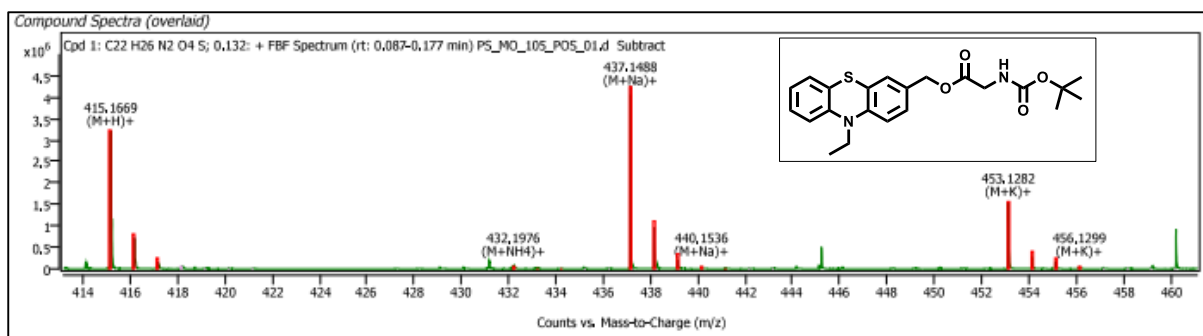

Fig. S21 HRMS spectrum of **4e**.

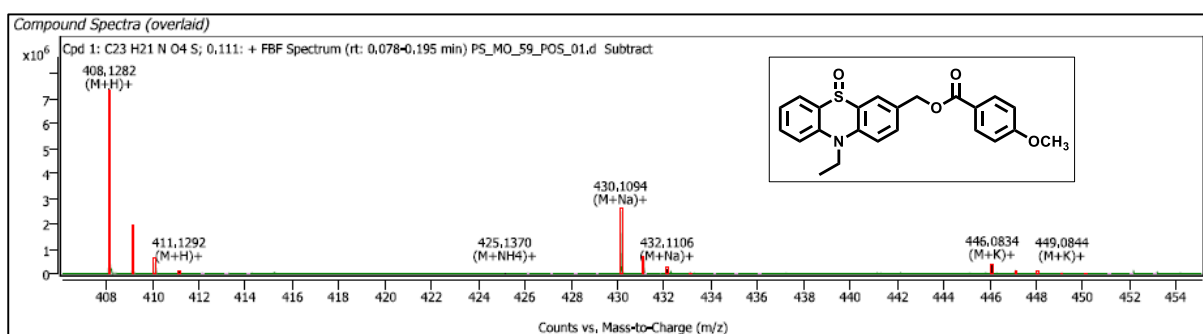

Fig. S22 HRMS spectrum of **5a**.

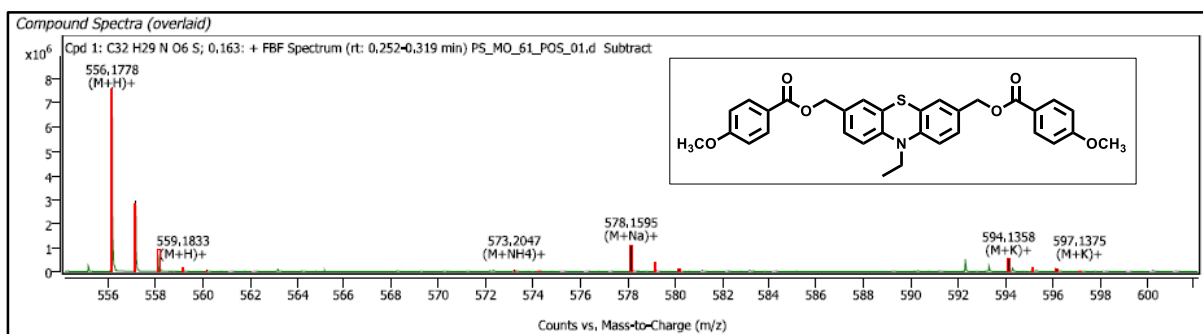

Fig. S23 HRMS spectrum of **8a**.

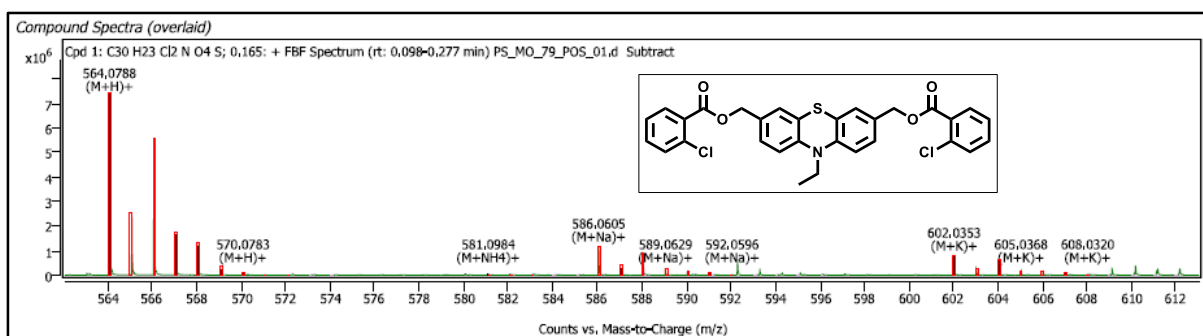

Fig. S24 HRMS spectrum of **8b**.

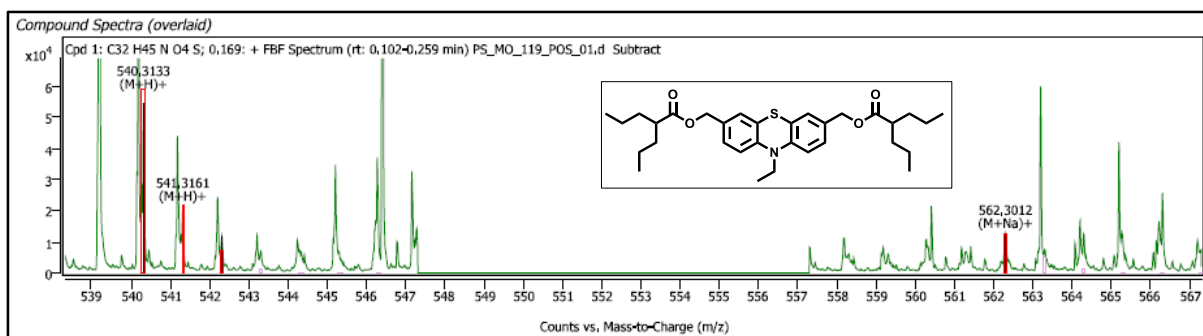

Fig. S25 HRMS spectrum of **8c**.

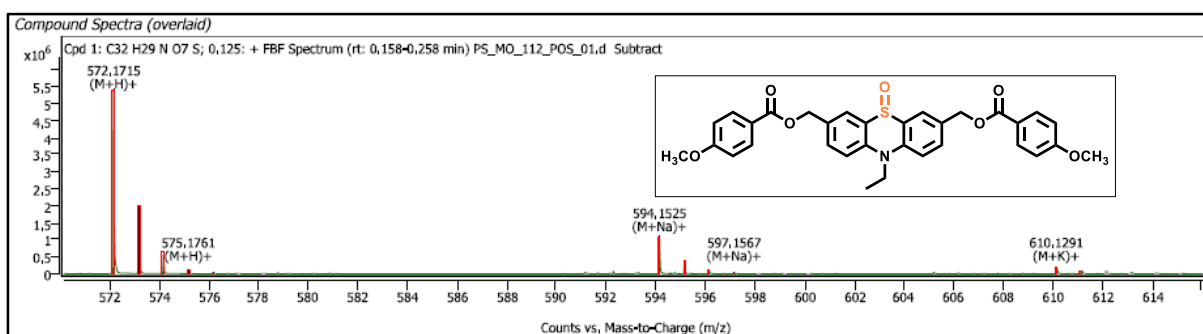

Fig. S26 HRMS spectrum of **9a**.

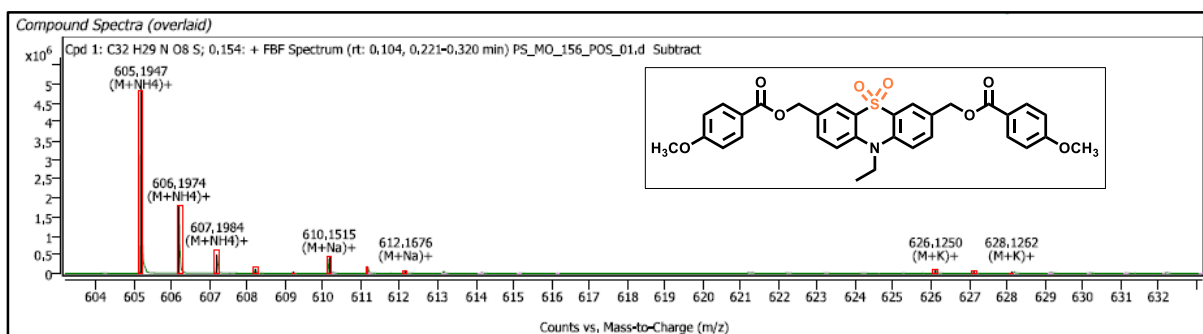

Fig. S27 HRMS spectrum of **10a**.

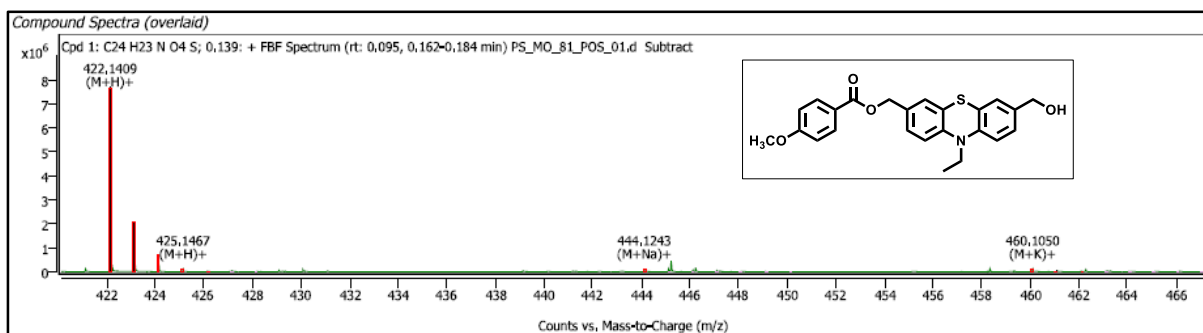

Fig. S28 HRMS spectrum of **11**.

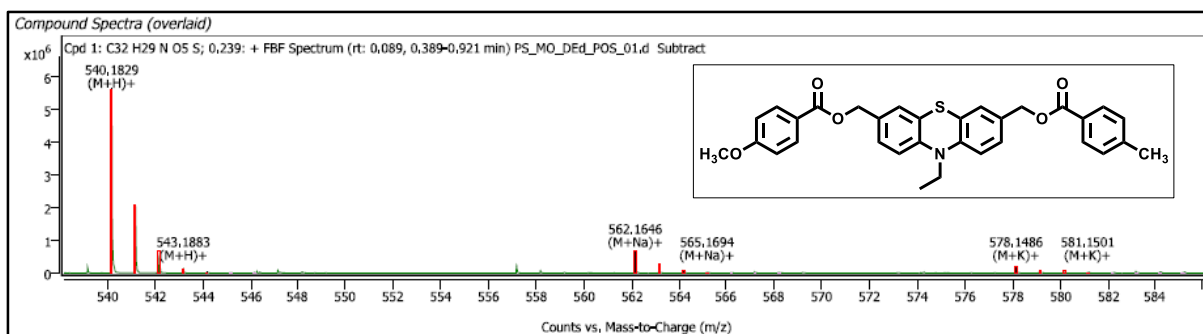

Fig. S29 HRMS spectrum of **12a**.

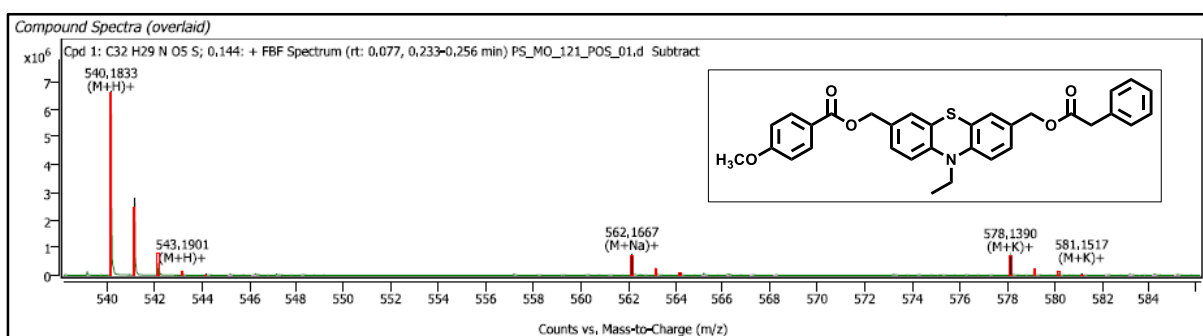

Fig. S30 HRMS spectrum of **12b**.

## 6. Photophysical properties of caged ester:

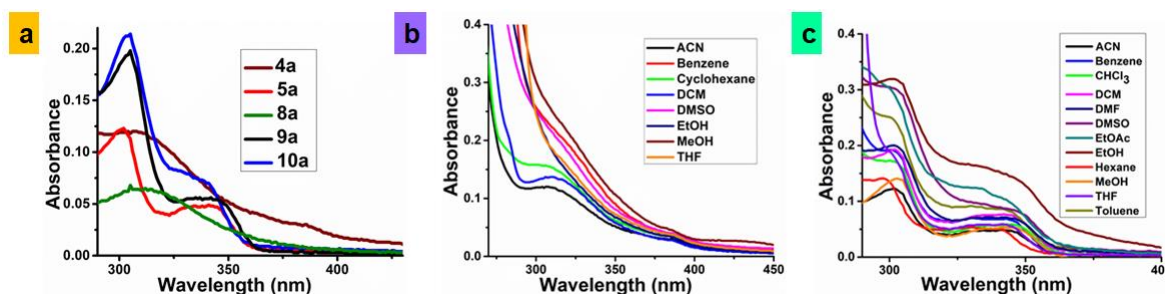

Fig. S31 Absorption spectra of (a) single (**4a**) and dual-arm (**8a**) caged ester, oxidized caged ester **5a** (single-arm mono-OPTZ), **9a** (dual-arm mono-OPTZ), **10a** (dual-arm di-OPTZ) in ACN ( $10^{-5}$  M) (b) single-arm caged ester **4a** in different solvents ( $10^{-5}$  M) and (c) **5a** (mono-OPTZ) in different solvents ( $10^{-5}$  M).

The absorption and emission spectra of a degassed solution of all the caged esters were recorded in acetonitrile ( $1 \times 10^{-5}$  M). The absorption, emission maxima, Stokes shift, and fluorescence quantum yield of all the single (**4a-e**) and dual-arm caged ester (**8a-c**, **12a-b**), mono-oxidized caged ester (**5a**, **9a**), and di-oxidized caged ester (**10a**) are summarized in Table S1.

**Table S1.** Photophysical data of all the single (**4a-e**) and dual-arm caged ester (**8a-c**, **12a-b**), mono-oxidized caged ester (**5a**, **9a**), and di-oxidized caged ester (**10a**).

| Caged ester | Synthetic yield <sup>a</sup> | Absorbance                         |                                                                                    | Fluorescence                       |                                |                                  |                       |
|-------------|------------------------------|------------------------------------|------------------------------------------------------------------------------------|------------------------------------|--------------------------------|----------------------------------|-----------------------|
|             |                              | $\lambda_{\max}$ (nm) <sup>b</sup> | $\epsilon_{\max} \times 10^3$ (L mol <sup>-1</sup> cm <sup>-1</sup> ) <sup>c</sup> | $\lambda_{\max}$ (nm) <sup>d</sup> | Stokes shift <sup>e</sup> (nm) | Stokes shift (cm <sup>-1</sup> ) | $\Phi_f$ <sup>h</sup> |
| <b>4a</b>   | 92                           | 308                                | 12.0                                                                               | 455                                | 147                            | 10489                            | 0.038                 |
| <b>4b</b>   | 90                           | 307                                | 11.8                                                                               | 456                                | 149                            | 10643                            | 0.035                 |
| <b>4c</b>   | 88                           | 309                                | 11.9                                                                               | 454                                | 145                            | 10336                            | 0.037                 |
| <b>4d</b>   | 85                           | 306                                | 11.5                                                                               | 446                                | 140                            | 10258                            | 0.032                 |
| <b>4e</b>   | 80                           | 307                                | 11.7                                                                               | 449                                | 142                            | 10301                            | 0.034                 |
| <b>8a</b>   | 69                           | 312                                | 6.5                                                                                | 462                                | 150                            | 10406                            | 0.038                 |
| <b>8b</b>   | 65                           | 310                                | 6.6                                                                                | 461                                | 151                            | 10566                            | 0.036                 |
| <b>8c</b>   | 70                           | 309                                | 6.4                                                                                | 459                                | 150                            | 10575                            | 0.035                 |
| <b>12a</b>  | 77                           | 311                                | 6.8                                                                                | 460                                | 149                            | 10415                            | 0.036                 |
| <b>12b</b>  | 70                           | 310                                | 6.7                                                                                | 461                                | 150                            | 10566                            | 0.037                 |
| <b>5a</b>   | 91                           | 344                                | 4.9                                                                                | 456                                | 112                            | 7139                             | 0.033                 |
| <b>9a</b>   | 90                           | 345                                | 5.6                                                                                | 425                                | 80                             | 5456                             | 0.030                 |
| <b>10a</b>  | 47                           | 340                                | 7.4                                                                                | 370                                | 30                             | 2384                             | 0.026                 |

<sup>a</sup>Based on isolated yield, <sup>b</sup>Maximum absorption wavelength, <sup>c</sup>Molar absorption coefficient at maximum absorption wavelength <sup>d</sup>Maximum emission wavelength, <sup>e</sup>Difference between maximum absorption wavelength and maximum emission wavelength in nm, <sup>h</sup>Fluorescence quantum yield (error limit within  $\pm 5\%$ ).

## 7. Measurement of fluorescence quantum yields:

The quantum yield (QY) of the single and dual-arm FPRPG was determined by the reference point method. 9, 10-diphenyl anthracene as standard ( $\Phi = 0.95$  in ethanol) was used as a standard sample to calculate the QY of phenothiazine caged esters (**4a-e**, **5a**, **8a-c**, **9a**, **10a**, and **12a-b**) which were dissolved in acetonitrile. The absorbance values of the solutions at the excitation wavelength were measured with a UV-vis spectrophotometer. Photoluminescence (PL) emission spectra of all the sample



solutions were recorded by Hitachi F-7000 fluorescence spectrophotometer at an excitation wavelength of 310 nm. Further, the fluorescence quantum yield of caged esters was calculated using equation (1)

$$\frac{\Phi_S}{\Phi_R} = \frac{A_S}{A_R} \frac{(\text{Abs})_R}{(\text{Abs})_S} \frac{\eta_S^2}{\eta_R^2} \quad (1)$$

Where  $\Phi$  represents quantum yield, **Abs** represents absorbance, **A** represents the area under the fluorescence curve, and  $\eta$  is the refractive index of the medium. The subscripts **S** and **R** denote the corresponding parameters for the sample and reference, respectively.

### 8. Characterisation of photoproduct for photolysis of single-arm caged ester 4a:

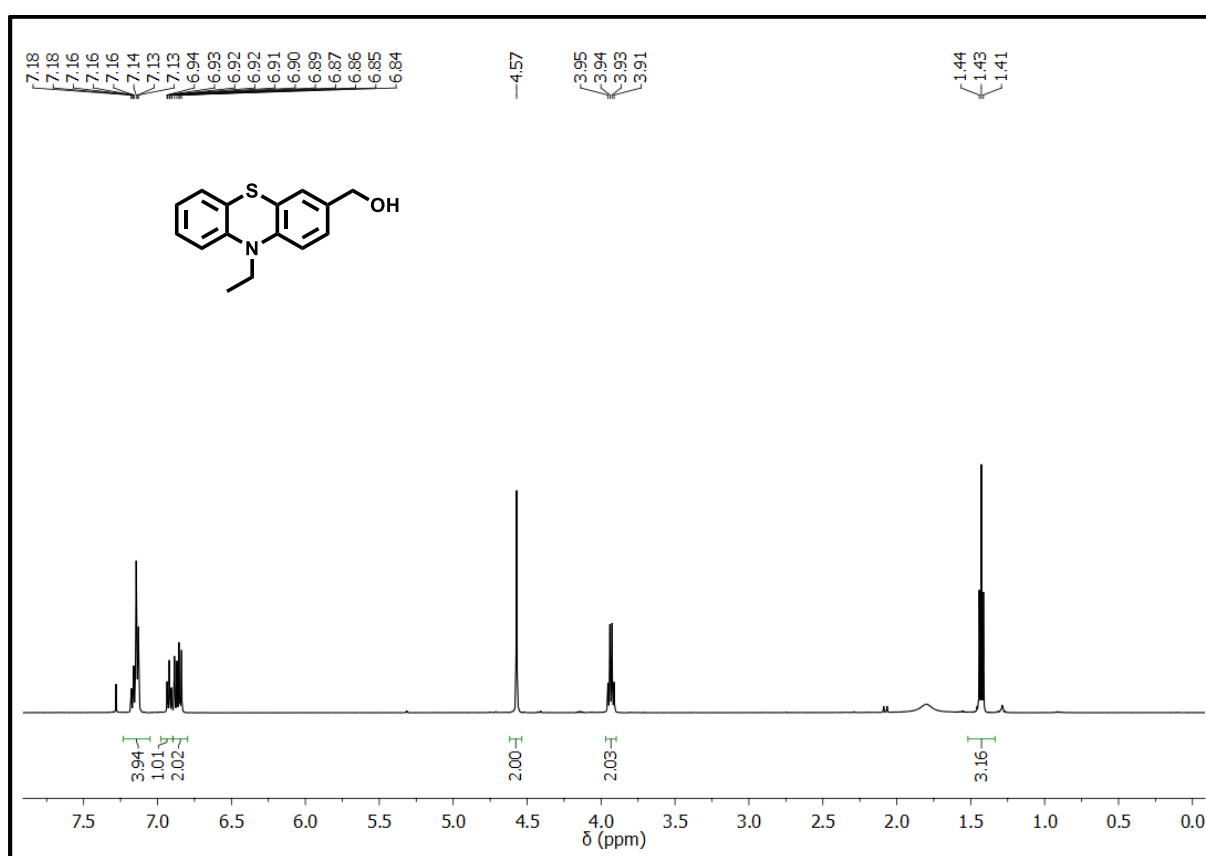

**Fig. S32** <sup>1</sup>H NMR (500 MHz) of photoproduct **3** in CDCl<sub>3</sub>.

### 9. Characterisation of photoproduct for photolysis of dual-arm (same) caged ester 8a:

#### a) <sup>1</sup>H NMR study of dual-arm caged ester 8a during photolysis:

Here, we have shown the photorelease of dual caged ester **8a** ( $1 \times 10^{-4}$  M) in ACN/H<sub>2</sub>O (1:1 v/v) at 365 nm wavelength by <sup>1</sup>H NMR at different irradiation time intervals. With an increase in irradiation time from 0 to 20 min, the intensity of the characteristic ester peaks at 5.20 ppm of **8a** decreases, and three new CH<sub>2</sub> peaks at 5.39 ppm, 4.78 ppm, and 4.57 ppm appeared. Peaks **c** and **d** correspond to the benzylic

alcohol protons of photoproducts **11** and **7**, respectively. Peak **b** corresponds to the benzylic protons of single-arm caged ester. Upon continuation of photolysis for 20 min, we noted a decrease in the intensity of the peak (**a**) at 5.20 ppm and an increase in the intensity of the peak (**d**) at 4.78, indicating the decomposition of dual-arm caged ester **8a** and formation of final photoproduct **7**.

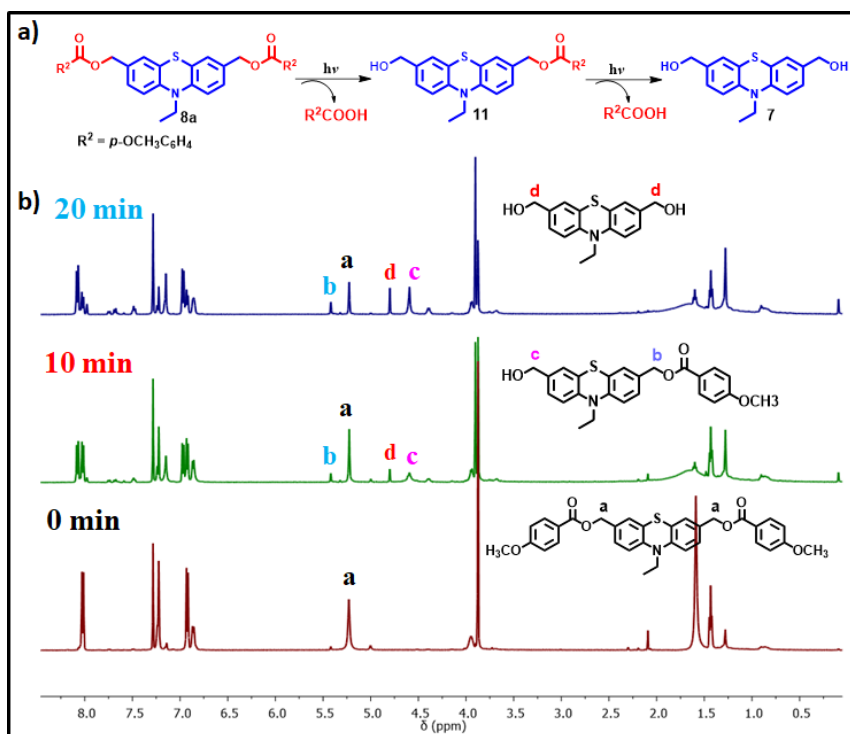

**Fig. S33** (a) Stepwise photorelease scheme for dual caged esters **8a** ( $1 \times 10^{-4}$  M). (b)  $^1\text{H}$  NMR study of dual-arm caged ester **8a** in  $\text{CDCl}_3$  at different time intervals during photolysis ( $\lambda \geq 365$  nm).

**b). HRMS spectra of dual-arm (same) caged ester **8a** and its photoproducts during photolysis:**

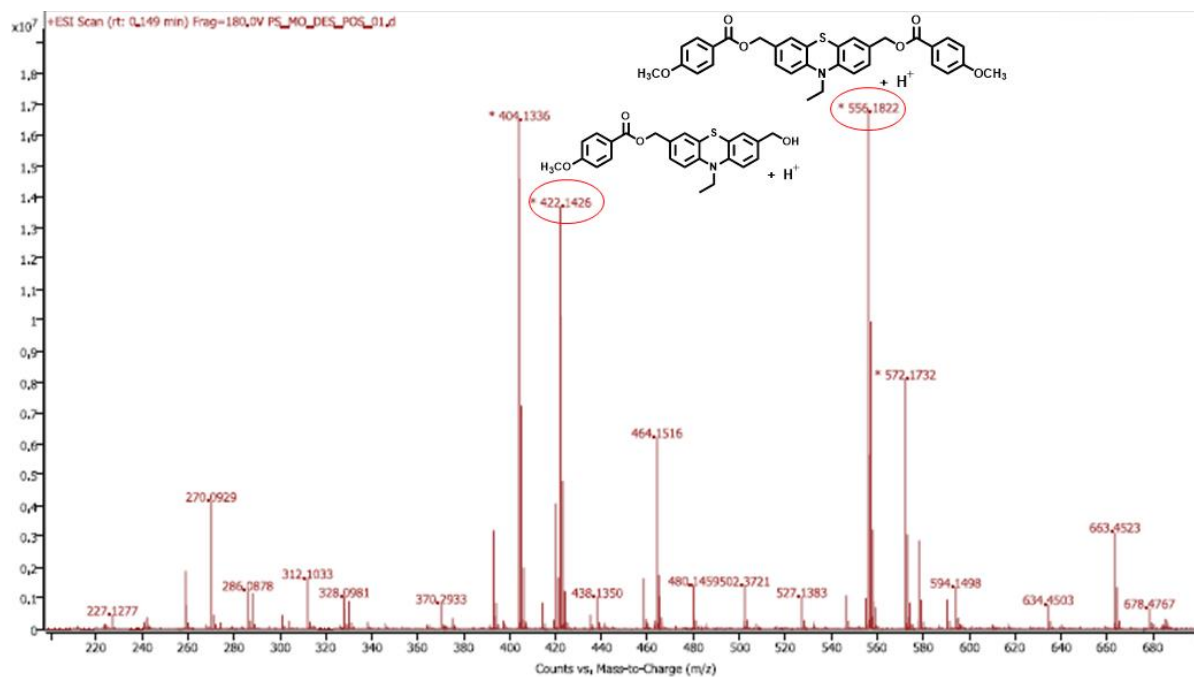

Compound Spectra (overlaid)

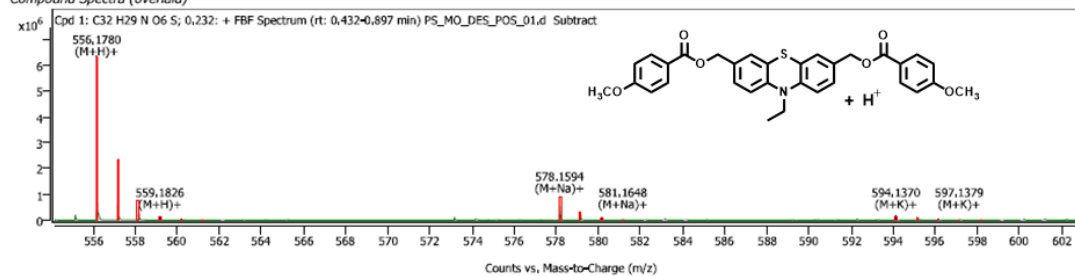

Compound Spectra (overlaid)

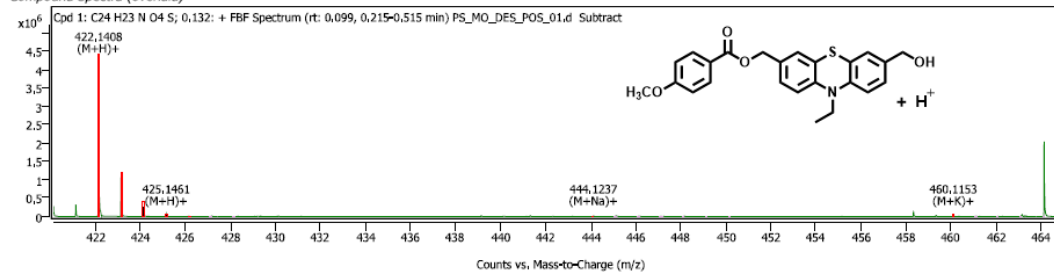

Compound Spectra (overlaid)

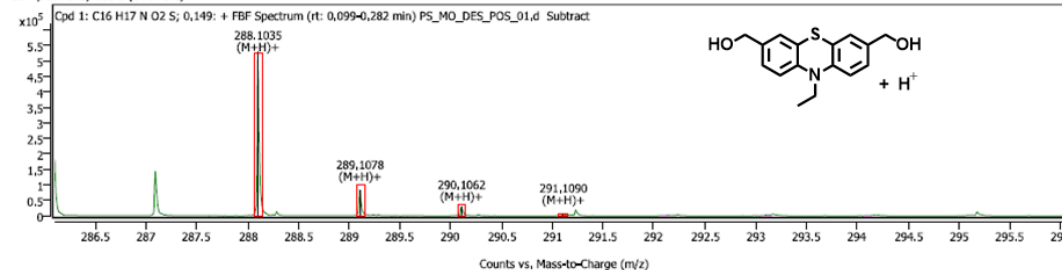

Fig. S34 HRMS spectra of dual-arm (same) caged ester **8a** and its photoproducts.

10. Characterisation of photoproduct for photolysis of dual-arm (different) caged ester **12a** by HRMS spectra:

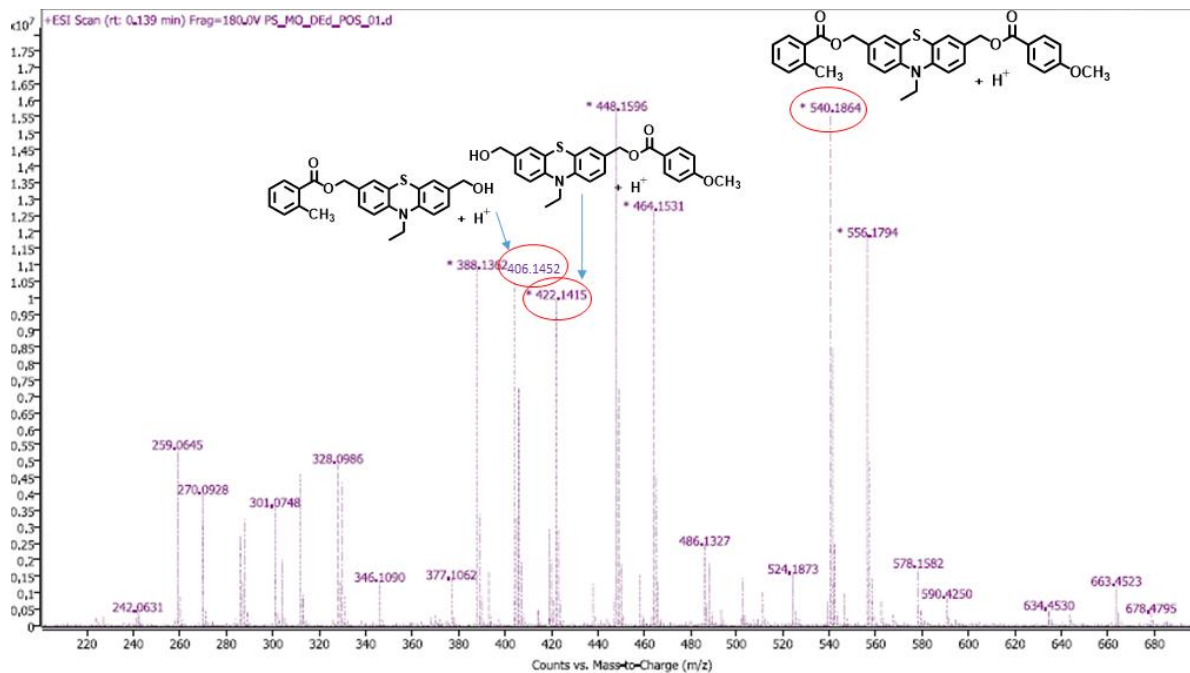

Compound Spectra (overlaid)

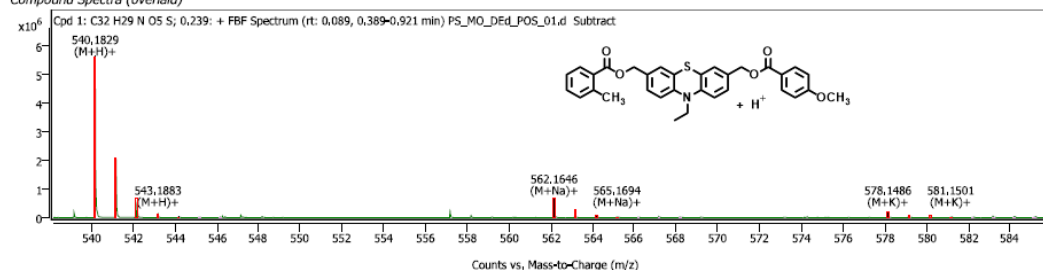

Compound Spectra (overlaid)

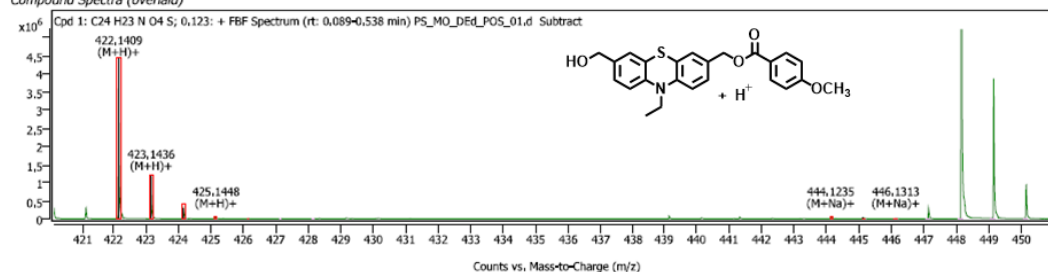

Compound Spectra (overlaid)

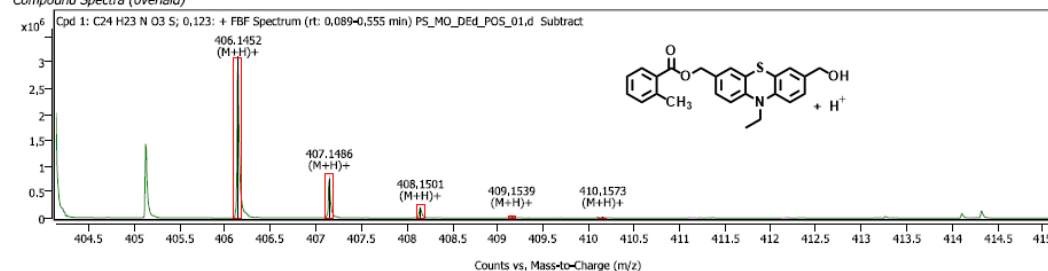

Compound Spectra (overlaid)

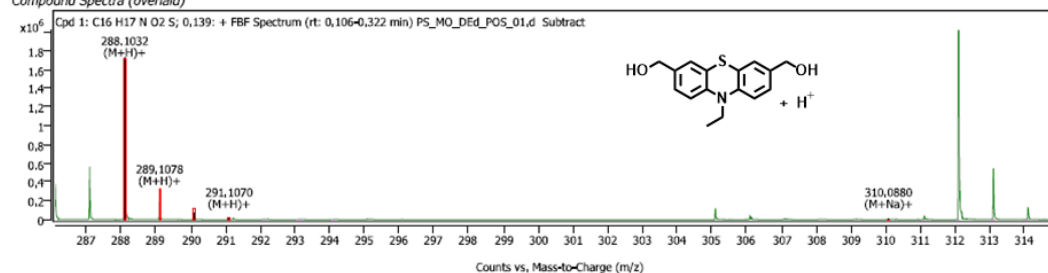

**Fig. S35** HRMS spectra of dual-arm (different) caged ester **12a** and its photoproducts.

### 11. Hydrolytic stability of the caged esters under dark:

| Caged Esters | % of depleted | Caged Esters | % of depleted |
|--------------|---------------|--------------|---------------|
| 4a           | 5             | 8a           | 6             |
| 4b           | 7             | 8b           | 5             |
| 4c           | 6             | 8c           | 8             |
| 4d           | 8             | 12a          | 6             |
| 4e           | 9             | 12b          | 7             |

**Table S2.** Hydrolytic stability of the single-arm (**4a-e**) and dual-arm (**8a-c** and **12a-b**) caged esters under dark.

### 12. Photorelease study of **4a** in the presence of singlet and triplet quencher:

Photorelease study of  $10^{-4}$  M compound **4a** was performed in the presence and absence of 1mM triplet and singlet quencher individually and was monitored the course of photolysis by RP-HPLC. Naphthalene and potassium sorbate was used as singlet and triplet quencher, respectively. We observed (fig. S35) that there is no change in photolysis in the presence of triplet quencher, whereas, in the presence of naphthalene, photolysis is quenched.

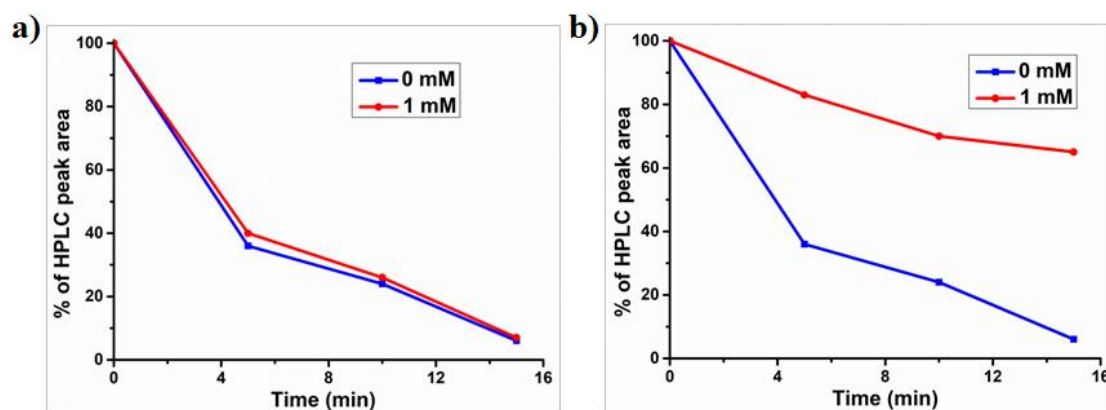

**Fig. S36** Photorelease study of single-arm caged ester **4a** ( $1 \times 10^{-4}$  M) in the presence of a) triplet quencher and b) singlet quencher.

### 13. Measurement of singlet oxygen quantum yield of oxidized caged ester **5a** (mono-OPTZ) and **10a** (di-OPTZ) in acetonitrile:

The  $\Phi_{\Delta}$  of each solution was calculated by the following equation,

$$\Phi_S = \frac{K_S}{K_R} \times \Phi_R \quad (2)$$

Where,  $K$  is the slope of the photodegradation plot of DPBF against time (s) and the subscripts S and R denote the sample and the reference respectively, and  $\Phi_R$  is the singlet oxygen quantum yield of the reference (Rose Bengal).<sup>6</sup>

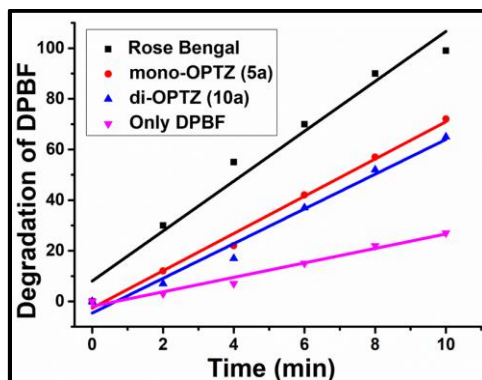

**Fig. S37** Photodegradation of DPBF ( $1 \times 10^{-4}$ ) at 415 nm in the presence of oxidized caged ester **5a** (mono-OPTZ) and **10a** (di-OPTZ) and Rose Bengal ( $1 \times 10^{-4}$ ) under visible-light irradiation.

#### 14. Determination of incident photon flux ( $I_0$ ) of the UV lamp by potassium ferrioxalate actinometry:

Potassium ferrioxalate actinometry was used for the determination of incident photon flux ( $I_0$ ) of the UV lamp used for irradiation. Solution of potassium ferrioxalate, 1, 10-phenanthroline, and the buffer solution was prepared following the literature procedure.<sup>7</sup>

Solution (0.006 M) of potassium ferrioxalate was irradiated using 125W medium pressure Hg lamp as UV light source ( $\geq 365$  nm) and 1M  $\text{CuSO}_4$  solution as UV cut-off filter. At a regular interval of time (3 min), 1ml of the aliquots was taken out, and to it, 3 ml of 1,10 phenanthroline solution and 2 ml of the buffer solution were added, and the whole solution was kept in the dark for 30 min. The absorbance of the red phenanthroline-ferrous complex formed was then measured spectrophotometrically at 510 nm. The amount of  $\text{Fe}^{2+}$  ion was determined from the calibration graph. The calibration graph was plotted by measuring the absorbance of the phenanthroline-ferrous complex at several known concentrations of  $\text{Fe}^{2+}$  ion in the dark. From the slope of the graph, the **molar absorptivity** of the phenanthroline-ferrous complex was calculated to be  $1.11 \times 10^4 \text{ M}^{-1} \text{ cm}^{-1}$  at 510 nm, which is found to be similar to the reported value.<sup>8</sup> Using the known **quantum yield** ( $1.283 \pm 0.023$ ) for potassium ferrioxalate actinometer at 363.8 nm, the number of  $\text{Fe}^{2+}$  ions formed during photolysis and the fraction of light absorbed by the actinometer, the incident photon flux ( $I_0$ ) at 365 nm of the 125W Hg lamp was determined as  $3.7 \times 10^{17}$  photons  $\text{s}^{-1} \text{ cm}^{-2}$ .

$$\Phi_{\text{act}} = k_{\text{act}} / [(I_0 / N_A) \times F] \quad (3)$$

Where,  $k$  is the rate of reaction;  $I_0$  is photon flux;  $F$  is fraction of light absorbed (molar absorptivity);  $N_A$  is Avogadro's no. From the above equation, we calculated the rate of reaction of actinometer ( $k_{act}$ ) and we calculated the photochemical quantum yield by putting the value of  $k_{act}$  in the **equation 4**.

Similarly, we were determined the incident photon flux ( $I_0$ ) at 410 nm of the 125W Hg lamp is  $2.886 \times 10^{16}$  photons  $s^{-1}cm^{-2}$ .<sup>9</sup>

### 15. Measurement of photochemical quantum yields and photochemical rate constant determination for the photodegradation of single-arm caged ester **4a** and dual-arm caged ester **8a**:

A solution of  $1 \times 10^{-4}$  M of the caged esters (**4a** and **8a**) was prepared in ACN/H<sub>2</sub>O (1:1 v/v). The solution is then irradiated using 125 W medium pressure Hg lamp 1M CuSO<sub>4</sub> solution as UV cut-off filter for 30 min and similarly using 125 W medium pressure. At a regular interval of time, 20  $\mu$ l of the aliquots was taken and analyzed by RP-HPLC using mobile phase acetonitrile-water (9:1 v/v), at a flow rate of 1 mL/min (detection: UV 254 nm). Peak areas were determined by RP-HPLC, which indicated a gradual decrease of the caged ester with time and the average of three runs. The reaction was followed until the consumption of the caged ester was less than 10% of the initial area. Based on HPLC data for caged compounds, the natural logarithm of the concentration of caged compound ( $\ln C$ ) (from HPLC peak area) versus irradiation time was plotted. We observed an exponential correlation for the disappearance of the caged compounds, which suggested a first-order reaction.

Further, the quantum yield for the photolysis of caged esters was calculated using equation (4).

$$(\Phi_p)_{CG} = (\Phi_p)_{act} \frac{(k_p)_{CG}}{(k_p)_{act}} \frac{(F_{act})}{(F_{CG})} \quad (4)$$

Where the subscript 'CG' and 'act' denotes caged ester and actinometer, respectively. Potassium ferrioxalate was used as an actinometer.  $\Phi_p$  is the photolysis quantum yield,  $k_p$  is the photolysis rate constant, and  $F$  is the fraction of light absorbed.

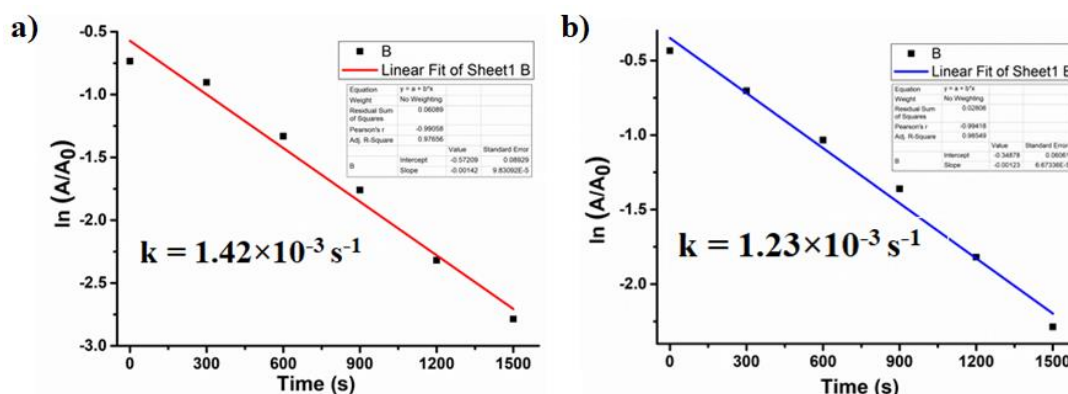

**Fig. S38** Rate of release from a) single-arm caged ester **4a** and b) dual-arm caged ester **8a**.

## 16. Computational Data:

Single-arm phenothiazine caged ester **4d** and momo-OPTZ of **4d** were optimized in the ground state using ORCA5<sup>10</sup> in B3LYP<sup>11-14</sup>/def2-TZVP<sup>15</sup> level of theory along with RIJCOSX<sup>16</sup> approximations and D3BJ<sup>17,18</sup> dispersion correction. We carried out a relaxed surface scan along the pathways for C-O breaking for the leaving groups using PBE/def2-SVP<sup>18,20</sup> level of theory along with RI<sup>21</sup> approximation in the ORCA Package. The singlet and triplet excitation energies were calculated at all these points using CAM-B3LYP/def2-TZVP and RIJCOSX approximation. The maxima from the PES was taken as the guess TS, optimized in CAM-B3LYP/def2-TZVP(D3BJ) level of theory. The TS was corroborated with a negative frequency and intrinsic reaction coordination search in the same level of view. The molecular orbital and the electron density maps were studied using Multiwfn<sup>22</sup> program.

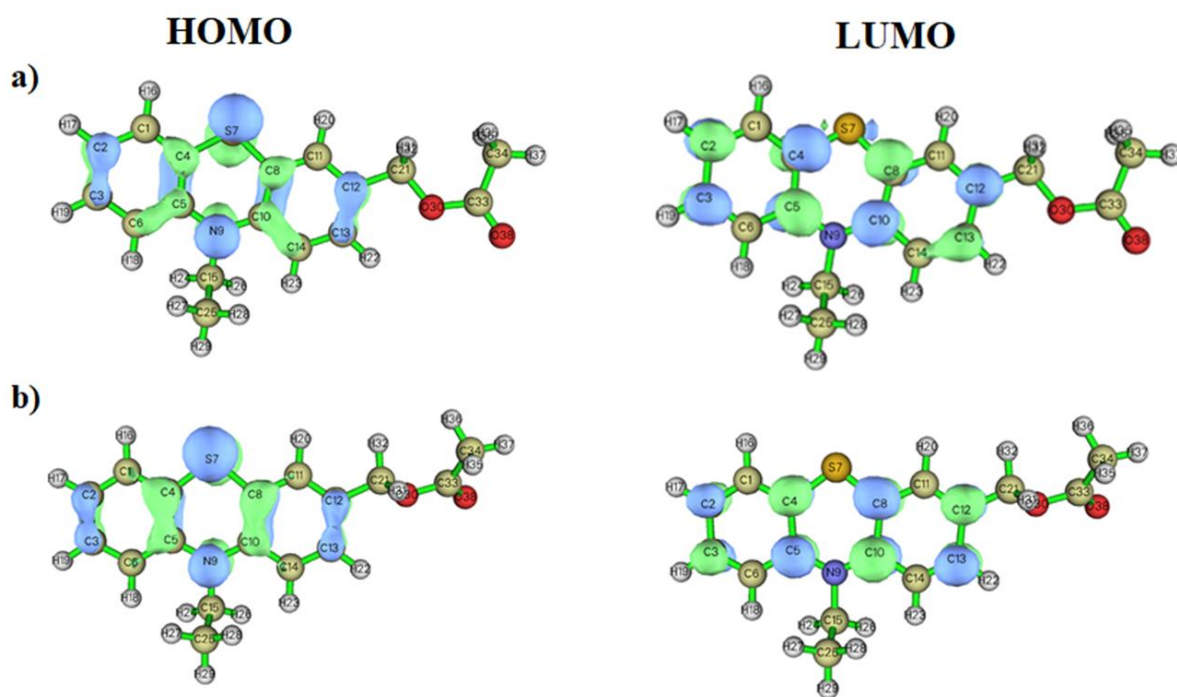

**Fig. S39** Orbital picture of HOMO and LUMO involved in the a)  $S_0$  state b)  $S_1$  state of single-arm caged ester **4d**.



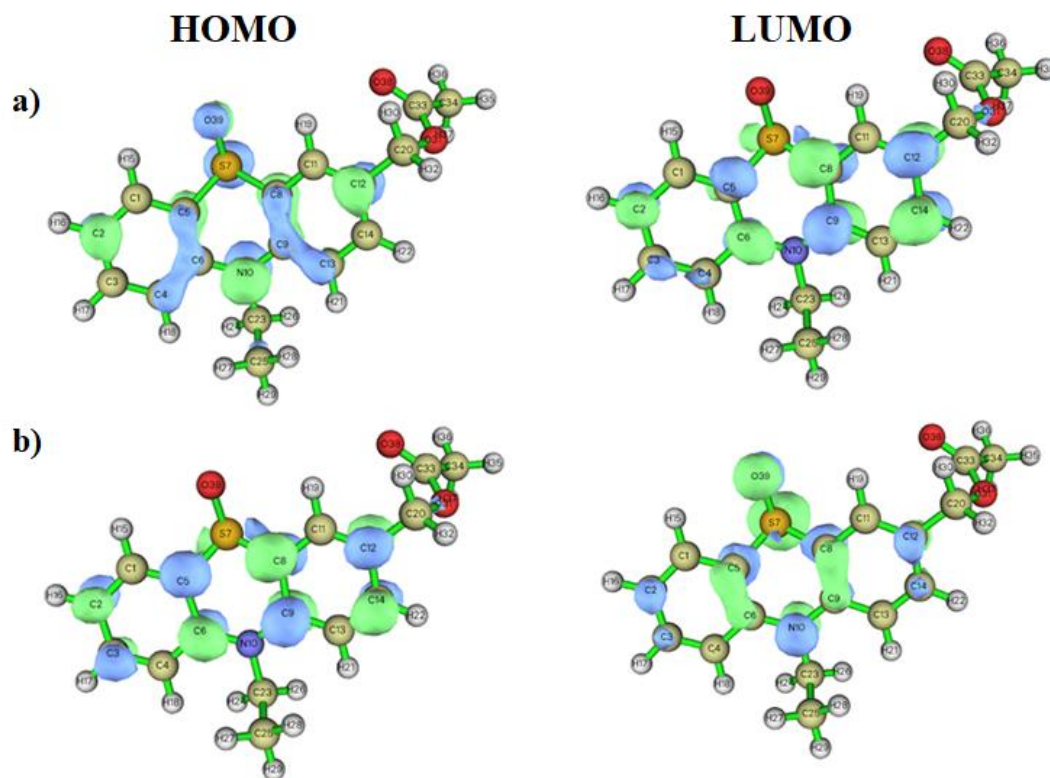

**Fig. S40** Orbital picture of HOMO and LUMO involved in the a) S<sub>0</sub> state b) S<sub>1</sub> state of mono-oxidized caged ester of **4d**.

**Table S3.** Vertical transition energy ( $\Delta E$ , eV) and wavelength ( $\lambda$ , nm), oscillator strength ( $f$ ) calculated at the TDDFT/CAM-B3LYP/def2tzvp level.

| State        | single-arm caged ester <b>4d</b> |                |             | mono-oxidized caged ester of <b>4d</b> |                |             |
|--------------|----------------------------------|----------------|-------------|----------------------------------------|----------------|-------------|
|              | $\Delta E$ (eV)                  | $\lambda$ (nm) | $f$         | $\Delta E$ (eV)                        | $\lambda$ (nm) | $f$         |
| <b>S0-S1</b> | 3.829                            | 323.8          | 0.007342253 | 4.318                                  | 287.1          | 0.063363601 |
| <b>S0-S2</b> | 4.414                            | 280.9          | 0.016539392 | 4.507                                  | 275.1          | 0.057373094 |
| <b>S0-S3</b> | 4.540                            | 273.1          | 0.011520512 | 4.955                                  | 250.2          | 0.034002717 |
| <b>S0-T1</b> | 3.160                            | 392.4          | 0           | 3.525                                  | 351.8          | 0           |
| <b>S0-T2</b> | 3.620                            | 342.5          | 0           | 3.790                                  | 327.2          | 0           |
| <b>S0-T3</b> | 3.863                            | 321.0          | 0           | 3.999                                  | 310.0          | 0           |

**S<sub>0</sub>(red), T<sub>1</sub>(magenta), S<sub>1</sub>(black) state PES scan of the C–O fission of positions of a) single-arm caged ester **4d** and b) mono-oxidized caged ester of **4d** (mono-OPTZ).**

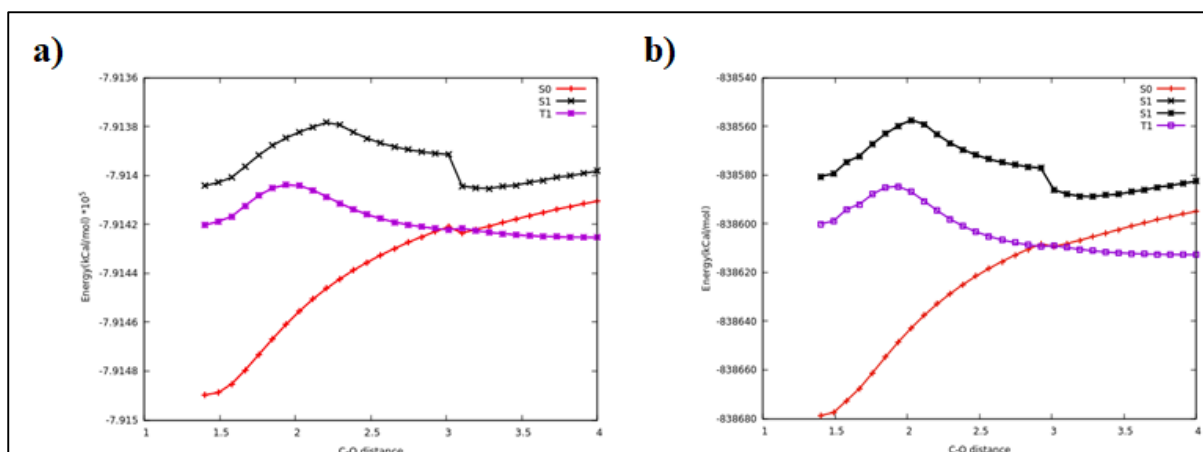

**Energy barrier in the photo-release in single-arm caged ester **4d** (C-1,magenta) and mono-oxidized caged ester of **4d** (mono-OPTZ) (C-2,blue) in the  $S_1$  state**

Lower activation energies ( $\Delta G$ ) suggest that the photorelease step is faster in the case of phenothiazine caged ester.

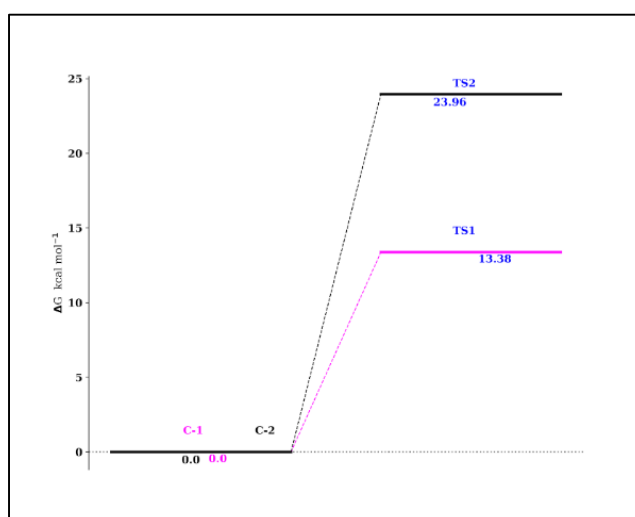

**17. Electron density map at the critical point around the C-O cleaved site for **4d** (left) and mono-OPTZ of **4d**:**

Electron density around the C-O site is more for single-arm caged ester **4d** than its oxidized caged ester at the critical point.

( $0.2523442822E+00$  for **4d** and  $0.2451720792E+00$  for mono-OPTZ of **4d**. This could be attributed due to the donation of electrons towards the ester group by electron-rich PTZ moiety in **4d**.

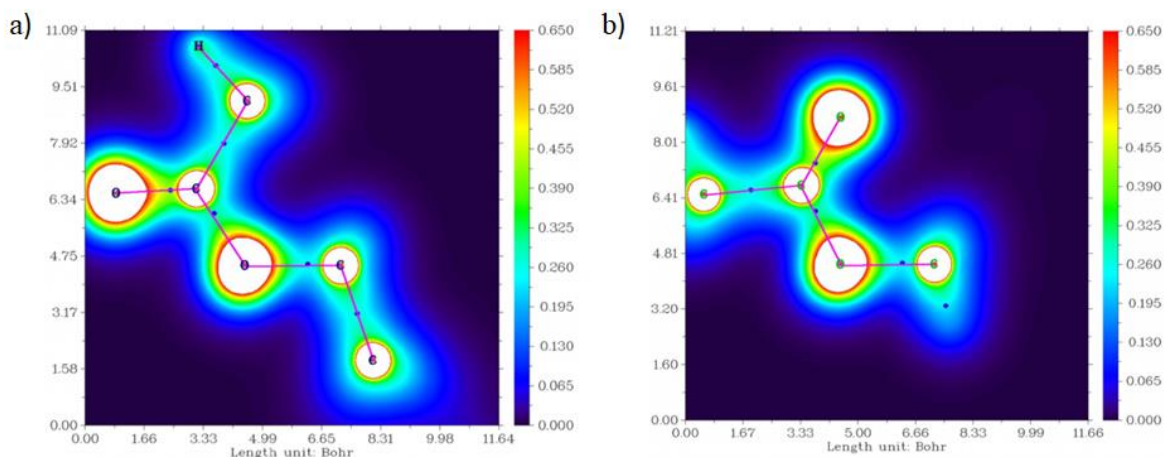

## 18. Cartesian coordinates used in DFT and TDFT Computations:

All coordinates optimised at cam-b3lyp/def2tzvp

a) Single-arm caged ester 4d at  $S_0$

FINAL SINGLE POINT ENERGY -1261.383790479081 Eh

Zero point energy 0.30834825 Eh

Nimag 0

38

|   |           |           |           |
|---|-----------|-----------|-----------|
| C | 3.841233  | -1.848378 | 0.137056  |
| C | 5.087944  | -1.318846 | 0.419716  |
| C | 5.243488  | 0.052151  | 0.415255  |
| C | 2.771909  | -1.024976 | -0.165442 |
| C | 2.904881  | 0.367282  | -0.135525 |
| C | 4.166141  | 0.883044  | 0.157061  |
| S | 1.281422  | -1.765801 | -0.727338 |
| C | 0.135964  | -0.549170 | -0.188742 |
| N | 1.813271  | 1.205138  | -0.415642 |
| C | 0.496090  | 0.800360  | -0.159318 |
| C | -1.162431 | -0.943685 | 0.080991  |
| C | -2.159011 | -0.018762 | 0.337521  |
| C | -1.819335 | 1.322292  | 0.332543  |
| C | -0.518107 | 1.723200  | 0.101184  |
| C | 2.066612  | 2.615410  | -0.671435 |
| H | 3.693043  | -2.920224 | 0.122474  |
| H | 5.921322  | -1.972213 | 0.635706  |
| H | 4.326655  | 1.947601  | 0.181876  |
| H | 6.207634  | 0.494036  | 0.627008  |
| H | -1.397734 | -2.000761 | 0.053607  |
| C | -3.558193 | -0.462620 | 0.626981  |
| H | -2.580343 | 2.071091  | 0.504587  |
| H | -0.303799 | 2.778290  | 0.118061  |
| H | 2.968582  | 2.677770  | -1.278945 |

|   |           |           |           |
|---|-----------|-----------|-----------|
| C | 2.206594  | 3.508146  | 0.558220  |
| H | 1.256487  | 2.979605  | -1.302032 |
| H | 3.041378  | 3.209450  | 1.188574  |
| H | 1.314345  | 3.489313  | 1.180240  |
| H | 2.375257  | 4.538469  | 0.242380  |
| O | -4.453217 | 0.306554  | -0.179579 |
| H | -3.799471 | -0.304708 | 1.681100  |
| H | -3.665005 | -1.525627 | 0.406493  |
| C | -5.788230 | 0.124915  | -0.125862 |
| C | -6.313399 | -0.956371 | 0.779398  |
| H | -6.016131 | -0.785889 | 1.813849  |
| H | -5.928991 | -1.932302 | 0.482687  |
| H | -7.395761 | -0.959102 | 0.709458  |
| O | -6.491031 | 0.819966  | -0.797886 |

b) Single-arm caged ester 4d at S<sub>1</sub>

FINAL SINGLE POINT ENERGY -1261.260836437680 Eh

Zero point energy ... 0.30598266 Eh

Nimag=0

38

|   |           |           |           |
|---|-----------|-----------|-----------|
| C | 3.902596  | -1.857720 | 0.059369  |
| C | 5.155029  | -1.335422 | -0.027629 |
| C | 5.307827  | 0.069833  | -0.129921 |
| C | 2.757021  | -1.037810 | 0.047290  |
| C | 2.895770  | 0.393380  | -0.087323 |
| C | 4.220826  | 0.891279  | -0.158310 |
| S | 1.261769  | -1.813370 | 0.137157  |
| C | 0.136419  | -0.557226 | 0.229407  |
| N | 1.802753  | 1.227070  | -0.129383 |
| C | 0.497909  | 0.834439  | 0.088165  |
| C | -1.211661 | -0.917909 | 0.398303  |
| C | -2.207859 | 0.008368  | 0.463832  |
| C | -1.856328 | 1.384554  | 0.357799  |
| C | -0.561657 | 1.767612  | 0.182389  |
| C | 2.042477  | 2.644570  | -0.413590 |
| H | 3.762203  | -2.928113 | 0.147763  |
| H | 6.020401  | -1.981535 | -0.006924 |
| H | 4.399455  | 1.952258  | -0.210431 |
| H | 6.296774  | 0.503342  | -0.177261 |
| H | -1.450338 | -1.972491 | 0.479209  |
| C | -3.624727 | -0.390496 | 0.668264  |
| H | -2.629862 | 2.137860  | 0.413967  |
| H | -0.359772 | 2.824816  | 0.133944  |
| H | 2.884460  | 2.707158  | -1.094241 |
| C | 2.287754  | 3.466943  | 0.839468  |
| H | 1.187860  | 3.018960  | -0.966171 |
| H | 3.158482  | 3.104644  | 1.383590  |
| H | 1.431578  | 3.425024  | 1.510849  |

|   |           |           |           |
|---|-----------|-----------|-----------|
| H | 2.460831  | 4.508856  | 0.569687  |
| O | -4.374560 | -0.059221 | -0.514644 |
| H | -4.056020 | 0.145416  | 1.518046  |
| H | -3.691385 | -1.462129 | 0.860157  |
| C | -5.703357 | -0.260120 | -0.585802 |
| C | -6.391842 | -0.854214 | 0.614400  |
| H | -6.293064 | -0.202598 | 1.482580  |
| H | -5.962993 | -1.820586 | 0.878366  |
| H | -7.442515 | -0.976772 | 0.374114  |
| O | -6.282189 | 0.035999  | -1.590206 |

c) Single-arm caged ester 4d TS at S<sub>1</sub>

FINAL SINGLE POINT ENERGY -1261.234634066753 Eh

Zero point energy ... 0.30173106 Eh 189.34 kcal/mol

Nimag=1

38

|   |           |           |           |
|---|-----------|-----------|-----------|
| C | -3.643039 | -1.869223 | -0.015443 |
| C | -4.867254 | -1.342747 | 0.310998  |
| C | -4.956801 | 0.021972  | 0.573893  |
| C | -2.504100 | -1.067128 | -0.081904 |
| C | -2.576912 | 0.320474  | 0.180065  |
| C | -3.849117 | 0.830383  | 0.507089  |
| S | -1.020421 | -1.887411 | -0.406289 |
| C | 0.078584  | -0.593647 | -0.689173 |
| N | -1.471032 | 1.134710  | 0.138213  |
| C | -0.239216 | 0.757065  | -0.422763 |
| C | 1.319394  | -0.966918 | -1.174579 |
| C | 2.320793  | -0.028256 | -1.429451 |
| C | 1.989554  | 1.335037  | -1.185528 |
| C | 0.758476  | 1.699134  | -0.714292 |
| C | -1.580870 | 2.491843  | 0.663858  |
| H | -3.541796 | -2.926865 | -0.223615 |
| H | -5.741848 | -1.975029 | 0.356780  |
| H | -3.976571 | 1.883181  | 0.692053  |
| H | -5.911902 | 0.463297  | 0.824024  |
| H | 1.522250  | -2.018055 | -1.338738 |
| C | 3.605383  | -0.436459 | -1.800967 |
| H | 2.727288  | 2.095268  | -1.388552 |
| H | 0.572503  | 2.749730  | -0.565157 |
| H | -2.258687 | 2.467022  | 1.514074  |
| C | -2.040186 | 3.519602  | -0.359412 |
| H | -0.607459 | 2.761699  | 1.065806  |
| H | -3.032559 | 3.286471  | -0.742417 |
| H | -1.361728 | 3.562305  | -1.209371 |
| H | -2.075277 | 4.508331  | 0.098960  |
| O | 4.650647  | -0.905655 | 0.020796  |
| H | 4.352846  | 0.295389  | -2.058243 |
| H | 3.790872  | -1.457134 | -2.090128 |

|   |          |           |          |
|---|----------|-----------|----------|
| C | 4.571303 | 0.059435  | 0.814589 |
| C | 5.264403 | -0.119537 | 2.164804 |
| H | 6.253907 | -0.542806 | 2.005904 |
| H | 4.680766 | -0.830075 | 2.750201 |
| H | 5.329167 | 0.824297  | 2.698674 |
| O | 3.978018 | 1.138563  | 0.632632 |

d) Mono-oxidized caged ester of 4d (mono-OPTZ) at S<sub>0</sub>

FINAL SINGLE POINT ENERGY -1336.600509851650 Eh

Zero point energy ... 0.31317673 Eh 196.52 kcal/mol

Nimag 0

39

|   |           |           |           |
|---|-----------|-----------|-----------|
| C | -3.402807 | -1.992428 | -0.394395 |
| C | -4.700983 | -1.566248 | -0.598532 |
| C | -5.021109 | -0.250280 | -0.317135 |
| C | -4.056776 | 0.643888  | 0.110681  |
| C | -2.445681 | -1.107402 | 0.062179  |
| C | -2.732344 | 0.240522  | 0.287225  |
| S | -0.878673 | -1.790279 | 0.551460  |
| C | 0.068600  | -0.380752 | 0.024830  |
| C | -0.403717 | 0.912999  | 0.255203  |
| N | -1.724371 | 1.141529  | 0.656808  |
| C | 1.342190  | -0.622158 | -0.450401 |
| C | 2.215494  | 0.424271  | -0.687101 |
| C | 0.500589  | 1.958337  | 0.050900  |
| C | 1.779011  | 1.710974  | -0.406858 |
| H | -3.108591 | -3.018006 | -0.574045 |
| H | -5.454565 | -2.255088 | -0.952623 |
| H | -6.036030 | 0.100660  | -0.447730 |
| H | -4.345877 | 1.667164  | 0.283164  |
| H | 1.653030  | -1.647031 | -0.605285 |
| C | 3.609276  | 0.178201  | -1.175123 |
| H | 0.207265  | 2.980220  | 0.223405  |
| H | 2.449446  | 2.547471  | -0.560640 |
| C | -2.100455 | 2.470051  | 1.118945  |
| H | -2.964737 | 2.352197  | 1.771055  |
| C | -2.402545 | 3.498136  | 0.032728  |
| H | -1.292566 | 2.829536  | 1.755073  |
| H | -3.234457 | 3.194382  | -0.598832 |
| H | -1.548726 | 3.662564  | -0.620473 |
| H | -2.661319 | 4.450749  | 0.496514  |
| H | 3.713429  | -0.834405 | -1.557361 |
| O | 4.581159  | 0.392587  | -0.133117 |
| H | 3.888208  | 0.890367  | -1.948530 |
| C | 4.762801  | -0.620175 | 0.730654  |
| C | 5.727507  | -0.241279 | 1.811568  |
| H | 6.632313  | 0.183482  | 1.380342  |
| H | 5.964086  | -1.115933 | 2.408893  |

|   |           |           |           |
|---|-----------|-----------|-----------|
| H | 5.272966  | 0.522213  | 2.443193  |
| O | 4.208273  | -1.679056 | 0.634565  |
| O | -0.563171 | -2.941558 | -0.318224 |

e) Mono-oxidized caged ester of 4d (mono-OPTZ) at S<sub>1</sub>

FINAL SINGLE POINT ENERGY -1336.461082182450 Eh

Zero point energy ... 0.31055873 Eh 194.88 kcal/mol

Nimag 0

39

|   |           |           |           |
|---|-----------|-----------|-----------|
| C | -3.479615 | -2.030103 | -0.352822 |
| C | -4.782609 | -1.641219 | -0.308738 |
| C | -5.093539 | -0.311096 | 0.072107  |
| C | -4.112695 | 0.594084  | 0.349260  |
| C | -2.451581 | -1.114069 | -0.079682 |
| C | -2.739276 | 0.254498  | 0.262477  |
| S | -0.867702 | -1.706602 | 0.128702  |
| C | 0.085689  | -0.335597 | -0.222811 |
| C | -0.406070 | 0.963841  | 0.161007  |
| N | -1.741853 | 1.188096  | 0.422863  |
| C | 1.420295  | -0.530480 | -0.600004 |
| C | 2.295877  | 0.512971  | -0.647248 |
| C | 0.552791  | 2.006568  | 0.164210  |
| C | 1.840995  | 1.795652  | -0.223849 |
| H | -3.201667 | -3.041156 | -0.618866 |
| H | -5.571026 | -2.334665 | -0.562794 |
| H | -6.126640 | 0.000596  | 0.135959  |
| H | -4.412439 | 1.597372  | 0.603522  |
| H | 1.743577  | -1.531868 | -0.852785 |
| C | 3.705709  | 0.326511  | -1.093124 |
| H | 0.272378  | 3.008610  | 0.444733  |
| H | 2.535568  | 2.625069  | -0.213477 |
| C | -2.128509 | 2.526473  | 0.878848  |
| H | -2.976116 | 2.416397  | 1.546454  |
| C | -2.449571 | 3.472832  | -0.264362 |
| H | -1.320636 | 2.912163  | 1.491451  |
| H | -3.278615 | 3.098809  | -0.862916 |
| H | -1.590997 | 3.599986  | -0.921627 |
| H | -2.725831 | 4.449933  | 0.132167  |
| H | 3.837878  | -0.636542 | -1.579795 |
| O | 4.633737  | 0.425062  | 0.012388  |
| H | 4.021414  | 1.122565  | -1.765643 |
| C | 4.795802  | -0.681077 | 0.753873  |
| C | 5.712898  | -0.426368 | 1.911520  |
| H | 6.626357  | 0.058714  | 1.571982  |
| H | 5.941427  | -1.365261 | 2.405883  |
| H | 5.222955  | 0.247831  | 2.614246  |
| O | 4.264474  | -1.729249 | 0.510879  |
| O | -0.556696 | -2.898859 | -0.661011 |

f) Mono-oxidized caged ester of 4d (mono-OPTZ) TS at S<sub>1</sub>  
FINAL SINGLE POINT ENERGY -1336.419614130762 Eh  
Zero point energy ... 0.30618190 Eh 192.13 kcal/mol  
Nimag=1

39

|   |           |           |           |
|---|-----------|-----------|-----------|
| C | -3.149343 | -2.308737 | -0.406991 |
| C | -4.461907 | -2.032386 | -0.140195 |
| C | -4.788954 | -0.770939 | 0.368983  |
| C | -3.837347 | 0.190540  | 0.579091  |
| C | -2.168627 | -1.337592 | -0.201480 |
| C | -2.472923 | -0.045151 | 0.293633  |
| S | -0.530011 | -1.840806 | -0.395588 |
| C | 0.281027  | -0.348560 | -0.650057 |
| C | -0.223843 | 0.840270  | -0.064676 |
| N | -1.525577 | 0.921872  | 0.464202  |
| C | 1.544284  | -0.452519 | -1.186156 |
| C | 2.398420  | 0.661556  | -1.229285 |
| C | 0.640680  | 1.944811  | -0.113660 |
| C | 1.891941  | 1.861678  | -0.664218 |
| H | -2.844957 | -3.271568 | -0.794054 |
| H | -5.228365 | -2.771745 | -0.318809 |
| H | -5.820784 | -0.536018 | 0.592810  |
| H | -4.155210 | 1.152944  | 0.941995  |
| H | 1.887657  | -1.411311 | -1.540188 |
| C | 3.731364  | 0.466866  | -1.568297 |
| H | 0.325710  | 2.900633  | 0.271838  |
| H | 2.528642  | 2.735945  | -0.646035 |
| C | -1.892321 | 2.151323  | 1.163604  |
| H | -2.610391 | 1.893582  | 1.937712  |
| C | -2.443102 | 3.235985  | 0.251616  |
| H | -1.006974 | 2.500342  | 1.688010  |
| H | -3.352784 | 2.909539  | -0.250284 |
| H | -1.722448 | 3.510440  | -0.516570 |
| H | -2.676440 | 4.127049  | 0.834739  |
| H | 4.039888  | -0.444157 | -2.051562 |
| O | 4.686767  | -0.140816 | 0.237655  |
| H | 4.424042  | 1.291950  | -1.587234 |
| C | 4.022082  | -0.899171 | 0.999757  |
| C | 4.549562  | -1.033757 | 2.416940  |
| H | 5.632266  | -1.146448 | 2.402088  |
| H | 4.085364  | -1.877921 | 2.921415  |
| H | 4.317984  | -0.118252 | 2.963176  |
| O | 2.983162  | -1.510412 | 0.693327  |
| O | -0.359095 | -2.855731 | -1.431428 |



## 19. References:

1. S. E. Ergun, M. D. Casselman, A. P. Kaur, N. H. Attanayake, S. R. Parkin and S. A. Odom, *New. J. Chem.*, 2020, **44**, 11349.
2. J. Yua, Z. Liua, B. Wanga, Y. Caoa, D. Liua, F. Lia and X. Yana, *Dyes and Pigments*, 2019, **170**, 107578.
3. L. Kong, J.-X. Yang, Z.-M. Xue, H.-P. Zhou, L.-J. Cheng, Q. Zhang, J.-Y. Wu, B.-K Jin, S.-Y. Zhanga and Y.-P. Tian, *J. Mater. Chem. C*, 2013, **1**, 5047.
4. J. Lee, J. Kwak, K. C. Ko, J. H. Park, J. H. Ko, N. Park, E. Kim, D. H. Ryu, T. K. Ahn, J. Y. Lee and S. U. Son, *Chem. Commun.*, 2012, **48**, 11431.
5. R. Kanagalatha, P. Rajakumar, C. S. S. Selvi and N. Mohan, *Asian Journal of Chemistry*, 2015, **27**, 4373.
6. N. E. Elezcano, V. M. Martínez, E. P. Cabrerab, C. F. A. G. Duránb, I. L. Arbeloaa and S. Lacombe, *RSC Adv.*, 2016, **6**, 41991.
7. E. T. Ryan, T. Xiang, K. P. Johnston and M. A. Fox, *J. Phys. Chem. A*, 1997, **101**, 1827.
8. C. J. Borman, B. P. Sullivan, C. M. Eggleston and P. J. S. Colberg, *Sensors*, 2009, **9**, 4390.
9. S. Barman, S. K. Mukhopadhyay, S. Biswas, S. Nandi, M. Gangopadhyay, S. Dey, A. Anoop and N. D. P. Singh, *Angew. Chemie - Int. Ed.*, 2016, **55**, 4194.
10. F. Neese, F. Wennmohs, U. Becker and C. Riplinger, *J. Chem. Phys.*, 2020, **152**, 224108.
11. A. D. Becke, *J. Chem. Phys.*, 1993, **98**, 5648.
12. C. Lee, W. Yang and R. G. Parr, *Phys. Rev. B: Condens. Matter Mater. Phys.*, 1988, **37**, 785.
13. S. H. Vosko, L. Wilk and M. Nusair, *Can. J. Phys.*, 1980, **58**, 1200.
14. P. J. Stephens, F. J. Devlin, C. F. Chabalowski and M. J. Frisch, *J. Phys. Chem.*, 1994, **98**, 11623.
15. F. Weigend and R. Ahlrichs, *Phys. Chem. Chem. Phys.*, 2005, **7**, 3297.
16. R. Izsák and F. Neese, *Mol. Phys.*, 2013, **111**, 1190.
17. S. Grimme, J. Antony, S. Ehrlich and H. Krieg, *J. Chem. Phys.*, 2010, **132**, 154104.
18. S. Grimme, S. Ehrlich and L. Goerigk, *J. Comput. Chem.*, 2011, **32**, 1456.
19. J. P. Perdew, K. Burke and M. Ernzerhof, *Phys. Rev. Lett.*, 1996, **77**, 3865.
20. A. Schäfer, H. Horn and R. Ahlrichs, *J. Chem. Phys.*, 1992, **97**, 2571.
21. K. Eichkorn, F. Weigend, O. Treutler and R. Ahlrichs, *Theor. Chem. Acc.*, 1997, **97**, 119.
22. T. Lu and F. Chen, *J. Comput. Chem.*, 2012, **33**, 580.
